# Supplementary material for: Oxidative NHC catalysis: direct activation of β sp3 carbons of saturated acid chlorides
Source: Royal Society of Chemistry journal article supplement (doi:10.1039/c8cc08578a), 2018-11-26
Supplement: c8cc08578a1.pdf [file c8cc08578a1.pdf]

*Supporting Information*

**Oxidative NHCs catalysis: direct activation of  $\beta$   $sp^3$  carbons of saturated  
acid chlorides**

Shi-Ya Zhu, Hua Zhang, Qing-Wei Ma, Dou Liu, Xin-Ping Hui\*

*State Key Laboratory of Applied Organic Chemistry, College of Chemistry and Chemical Engineering,*

*Lanzhou University, Lanzhou 730000, P. R. China*

e-mail: huixp@lzu.edu.cn

**Contents**

|                                                                                                |     |
|------------------------------------------------------------------------------------------------|-----|
| 1. General information.....                                                                    | S2  |
| 2. General procedures.....                                                                     | S2  |
| 2.1 Synthesis of N-heterocyclic carbene catalyst <b>D</b> .....                                | S2  |
| 2.2 General procedure for the synthesis of compounds <b>3a–3f</b> and <b>3h–3p</b> .....       | S3  |
| 2.3 General procedure for the synthesis of compounds <b>5a–5i</b> .....                        | S3  |
| 2.4 General procedure for the synthesis of compound <b>7a–7b</b> .....                         | S4  |
| 3. Characterization of compounds <b>3a–3f</b> and <b>3h–3p</b> .....                           | S4  |
| 4. Characterization of compounds <b>5a–5i</b> and <b>7a–7b</b> .....                           | S10 |
| 5. X-Ray crystal structure of compound <b>3b</b> .....                                         | S14 |
| 6. NMR spectra of compounds <b>3a–3f</b> , <b>3h–3p</b> , <b>5a–5i</b> and <b>7a–7b</b> .....  | S15 |
| 7. HPLC spectra of compounds <b>3a–3f</b> , <b>3h–3p</b> , <b>5a–5i</b> and <b>7a–7b</b> ..... | S41 |

## 1. General information

$^1\text{H}$  NMR and  $^{13}\text{C}$  NMR spectra were recorded on a Bruker AVANCE III 400 spectrometer using tetramethylsilane as internal reference, and chemical shifts ( $\delta$ ) and coupling constants ( $J$ ) were expressed in ppm and Hz, respectively. The HRMS analysis was obtained on a Bruker Apex II FT-ICR mass spectrometer with ESI ionization method. The *ee* value determination was carried out using HPLC with chiral Chirapak column on Agilent 1260 with a UV-detector. Optical rotation was measured by the Perkin Elmer 341 polarimeter. Melting points were taken on an X-4 melting point apparatus and were uncorrected. Dichloromethane was freshly distilled from phosphorous pentoxide. Toluene was freshly distilled from a deep-blue solution of sodium-benzophenone under nitrogen. DBU, TBD,  $\text{K}_2\text{CO}_3$ ,  $\text{Cs}_2\text{CO}_3$ , DIPEA and DABCO were purchased from commercial suppliers and used directly. All syntheses and manipulations were carried out under dry nitrogen atmosphere. Flash column chromatography was carried out utilizing 200–300 mesh silica gel.

## 2. General procedures

### 2.1 Synthesis of *N*-heterocyclic carbene catalyst **D**

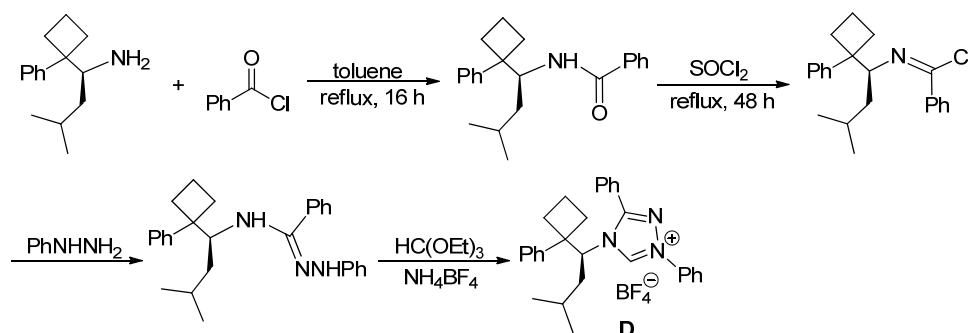

A flame-dried 100 mL round-bottom flask was charged with (*S*)-3-methyl-1-(1-phenylcyclobutyl)butan-1-amine (10 mmol) and reprocessed toluene (40 mL). Then benzoyl chloride (10 mmol) was added slowly. After that, the reaction mixture was refluxed and stirred for 16 h. Upon cooling, thionyl chloride (30 mmol) was added to the reaction, the reaction mixture was stirred at 85 °C for 48 h. After the reaction completed, the solvent was removed *in vacuo* and the remains was dissolved in THF. Keeping the solution stirred at 0 °C for 15 min before  $\text{NEt}_3$  (30 mmol) and phenylhydrazine (10 mmol) was added in one portion. The reaction mixture was stirred for 16 h at room temperature and then reflux for 5 h. The solvent was removed *in vacuo* and a solution of acetic acid (2%, 20 mL) was added. The mixture was heated to 75 °C and stirred for 1 h. After the reaction completed, the product was precipitated at an ice-water bath.

To a 50 mL round bottom flask equipped with a magnetic stir bar was added (*S*)-*N*-(3-methyl-1-(1-phenylcyclobutyl)butyl)-*N'*-phenylbenzohydrazonamide (5 mmol),  $\text{NH}_4^+\text{BF}_4^-$  (10 mmol) and of triethoxymethane (30 mmol). The reaction was carried out at 125 °C for 18 h. After the reaction was completed, the

clear dark solution was concentrated. The residue was purified by column chromatography using MeOH/DCM = 1/20 as eluent to yield the desired product **D** in 32% yield as light yellow solid.

$^1\text{H}$  NMR (300 MHz, DMSO- $d_6$ )  $\delta$  10.33 (s, 1H), 7.96 – 7.47 (m, 10H), 7.38 – 7.28 (m, 3H), 7.09 – 6.96 (m, 2H), 4.74 (d,  $J$  = 10.1 Hz, 1H), 2.33 (d,  $J$  = 6.5 Hz, 2H), 2.13 (d,  $J$  = 5.5 Hz, 1H), 1.99 (t,  $J$  = 11.9 Hz, 1H), 1.92 – 1.65 (m, 3H), 1.59 – 1.42 (m, 2H), 0.92 (dd,  $J$  = 9.3, 6.1 Hz, 6H).  $^{13}\text{C}$  NMR (75 MHz, DMSO- $d_6$ )  $\delta$  155.11, 142.17, 140.04, 134.86, 132.48, 130.86, 130.05, 129.84, 129.57, 128.46, 127.52, 127.38, 122.68, 121.05, 65.14, 51.13, 31.29, 30.97, 23.35, 23.22, 21.31, 15.52.

## 2.2 Procedure for the synthesis of compounds 3a–3f and 3h–3p

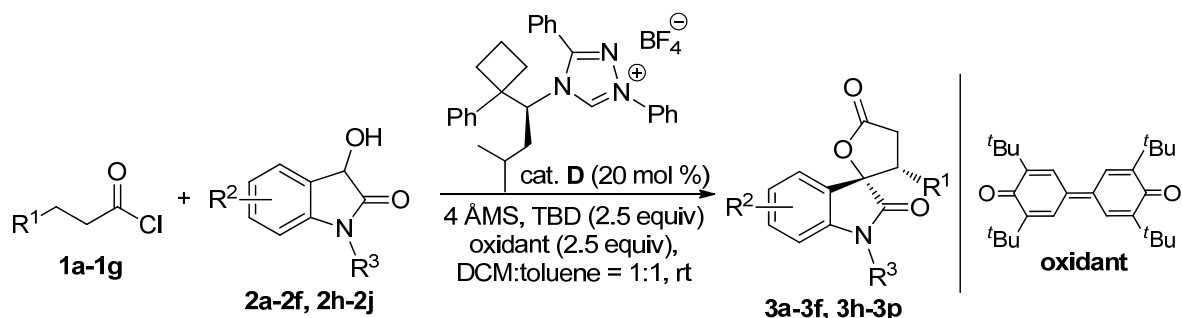

A stirred mixture of 3-substituted propanoyl chloride (**1**) (0.25 mmol), oxidant (0.25 mmol, 102.2 mg), 4 Å MS (100 mg), *N*-heterocyclic carbene catalyst **D** (0.02 mmol, 10.2 mg), TBD (0.25 mmol, 34.8 mg), and anhydrous DCM:toluene (1:1) (1 mL) was stirred for 0.5 h under nitrogen atmosphere. Then, a solution of substrate **2** (0.1 mmol) in DCM:toluene (1:1) (0.5 mL) was added and stirred at room temperature. The reaction was monitored by TLC. When the substrate **2** was disappeared, the reaction was quenched by water (2 mL) and the aqueous layer was extracted with ethyl acetate (5 mL×3). The combined organic layer was dried over anhydrous MgSO<sub>4</sub>. After removal of the solvent under reduced pressure, the crude residue was purified by flash column chromatography on silica gel using PE/EA (5:1) to afford the desired products **3**.

## 2.3 Procedure for the synthesis of compounds 5a–5i

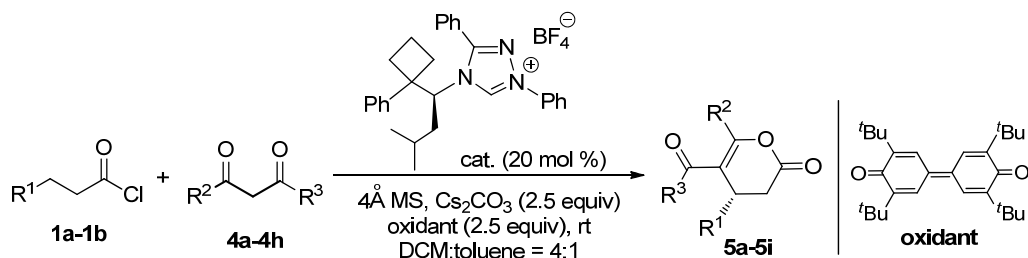

A stirred mixture of 3-substituted propanoyl chloride (**1a**) (0.25 mmol, 42.2 mg), oxidant (0.25 mmol, 102.2 mg), 4 Å MS (100 mg), *N*-heterocyclic carbene catalyst **D** (0.02 mmol, 10.2 mg), Cs<sub>2</sub>CO<sub>3</sub> (0.25 mmol, 81.5 mg), and anhydrous DCM:toluene (4:1) (1 mL) was stirred for 0.5 h under nitrogen atmosphere. Then,

a solution of substrate **4** (0.1 mmol) in DCM:toluene (4:1) (0.5 mL) was added, and the reaction was stirred for 48 h at room temperature. The reaction was quenched by water (2 mL), and the aqueous layer was extracted with ethyl acetate (5 mL×3). The combined organic layer was dried over anhydrous MgSO<sub>4</sub>. After removal of the solvent under reduced pressure, the crude residue was purified by flash column chromatography on silica gel using PE/EA (5:1) to afford the desired products **5**.

## 2.4 Procedure for the synthesis of compound 7a–7b

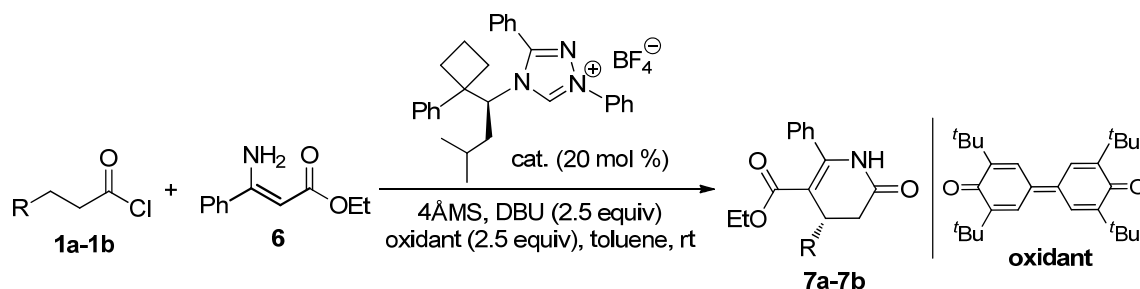

A stirred mixture of 3-phenylpropanoyl chloride (**1a**) (0.25 mmol, 42.2 mg), oxidant (0.25 mmol, 102.2 mg), 4Å MS (100 mg), *N*-heterocyclic carbene catalyst **D** (0.02 mmol, 10.2 mg), DBU (0.25 mmol, 37.4 μL), and anhydrous toluene (1 mL) was stirred for 0.5 h under nitrogen atmosphere. Then, a solution of enamine **6** (0.1 mmol, 19.1 mg) in toluene (0.5 mL) was added, and the reaction was stirred for 36 h at room temperature. The reaction was quenched by water (2 mL), and the aqueous layer was extracted with ethyl acetate (5 mL×3). The combined organic layer was dried over anhydrous MgSO<sub>4</sub>. After removal of the solvent under reduced pressure, the crude residue was purified by flash column chromatography on silica gel using PE/EA (5:1) to afford the desired product **7a**.

## 3. Characterization of compounds 3a–3f and 3h–3p

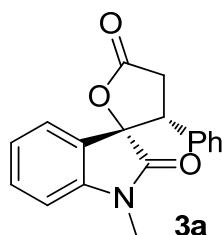

### (2*S*, 3*R*)-1'-methyl-3-phenyl-3,4-dihydro-5*H*-spiro[furan-2,3'-indoline]-2',5-dione (**3a**)

white solid, mp 148–151 °C,  $[\alpha]_D^{20}$  –99 (c 1.0, CH<sub>2</sub>Cl<sub>2</sub>). <sup>1</sup>H NMR (400 MHz, CDCl<sub>3</sub>) δ 7.54 (d, *J* = 7.2 Hz, 1H), 7.41–7.37 (m, 1H), 7.22–7.14 (m, 4H), 6.93 (d, *J* = 7.2 Hz, 2H), 6.67 (d, *J* = 7.6 Hz, 1H), 4.07 (dd, *J* = 14.0, 8.0 Hz, 1H), 3.82 (dd, *J* = 16.8, 13.6 Hz, 1H), 2.91 (dd, *J* = 16.8, 8.0 Hz, 1H), 2.82 (s, 3H). <sup>13</sup>C NMR (100 MHz, CDCl<sub>3</sub>) δ 174.79, 172.57, 144.32, 132.07, 131.27, 128.42, 128.26, 127.54, 124.73, 124.12, 123.47, 108.58, 86.43, 50.99, 32.18, 25.78. HRMS (ESI): Exact Mass Calcd. for C<sub>18</sub>H<sub>16</sub>NO<sub>3</sub>

(M+H)<sup>+</sup>: 294.1125, Found: 294.1128. HPLC (Chiralpak AD–H column, *n*-hexane/*i*-PrOH = 70/30, flow rate = 1.0 mL/min, retention time:  $t_{\text{major}} = 18.122$  min,  $t_{\text{minor}} = 36.708$  min, 96% ee).

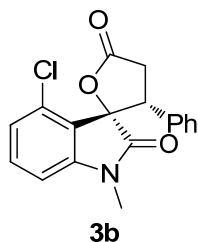

**(2S, 3R)-4'-chloro-1'-methyl-3-phenyl-3,4-dihydro-5H-spiro[furan-2,3'-indoline]-2',5-dione (3b)**

White solid, mp 127 – 130 °C,  $[\alpha]_{\text{D}}^{20} -95$  (c 1.0, CH<sub>2</sub>Cl<sub>2</sub>). <sup>1</sup>H NMR (400 MHz, CDCl<sub>3</sub>)  $\delta$  7.32 (t,  $J = 8.4$  Hz, 1H), 7.22 – 7.16 (m, 3H), 7.13 (d,  $J = 8.0$  Hz, 1H), 6.96 (d,  $J = 8.0$  Hz, 2H), 6.57 (d,  $J = 7.6$  Hz, 1H), 4.70 (dd,  $J = 13.6, 8.4$  Hz, 1H), 3.80 (dd,  $J = 16.8, 13.6$  Hz, 1H), 2.92 (dd,  $J = 16.8, 8.0$  Hz, 1H), 2.78 (s, 3H). <sup>13</sup>C NMR (100 MHz, CDCl<sub>3</sub>)  $\delta$  174.35, 171.95, 146.00, 132.36, 132.20, 131.96, 128.46, 128.31, 127.59, 124.50, 120.70, 107.06, 86.73, 46.06, 31.33, 25.92. HRMS (ESI): Exact Mass Calcd. for C<sub>18</sub>H<sub>15</sub>ClNO<sub>3</sub> (M+H)<sup>+</sup>: 328.0735, Found: 328.0731. HPLC (Chiralpak AD–H column, *n*-hexane/*i*-PrOH = 80/20, flow rate = 1.0 mL/min, retention time:  $t_{\text{major}} = 27.951$  min,  $t_{\text{minor}} = 46.048$  min, 95% ee).

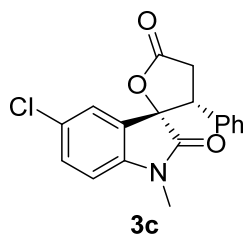

**(2S, 3R)-5'-chloro-1'-methyl-3-phenyl-3,4-dihydro-5H-spiro[furan-2,3'-indoline]-2',5-dione (3c)**

white solid, mp 133 – 135 °C,  $[\alpha]_{\text{D}}^{20} -110$  (c 1.0, CH<sub>2</sub>Cl<sub>2</sub>). <sup>1</sup>H NMR (400 MHz, CDCl<sub>3</sub>)  $\delta$  7.53 (d,  $J = 2.0$  Hz, 1H), 7.37 – 7.35 (d,  $J = 8.4, 2.0$  Hz, 1H), 7.24 – 7.16 (m, 3H), 6.95 (d,  $J = 7.2$  Hz, 2H), 6.60 (d,  $J = 8.4$  Hz, 1H), 4.04 (dd,  $J = 13.6, 8.0$  Hz, 1H), 3.79 (dd,  $J = 16.8, 14.0$  Hz, 1H), 2.92 (dd,  $J = 16.8, 8.0$  Hz, 1H), 2.80 (s, 3H). <sup>13</sup>C NMR (100 MHz, CDCl<sub>3</sub>)  $\delta$  174.24, 172.22, 142.84, 131.67, 131.19, 128.93, 128.54, 128.48, 127.54, 126.47, 124.64, 109.61, 86.07, 51.13, 32.01, 25.91. HRMS (ESI): Exact Mass Calcd. for C<sub>18</sub>H<sub>15</sub>ClNO<sub>3</sub> (M+H)<sup>+</sup>: 328.0735, Found: 328.0740. HPLC (Chiralpak AD–H column, *n*-hexane/*i*-PrOH = 70/30, flow rate = 1.0 mL/min, retention time:  $t_{\text{major}} = 8.943$  min,  $t_{\text{minor}} = 14.912$  min, 92% ee).

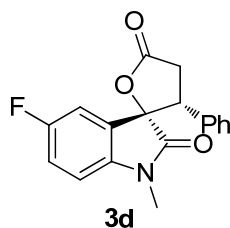

**(2S, 3R)-5'-fluoro-1'-methyl-3-phenyl-3,4-dihydro-5H-spiro[furan-2,3'-indoline]-2',5-dione (3d)**

white solid, mp 99 – 102 °C,  $[\alpha]_D^{20}$  -119 (c 1.0, CH<sub>2</sub>Cl<sub>2</sub>). <sup>1</sup>H NMR (400 MHz, CDCl<sub>3</sub>) δ 7.30 (dd,  $J$  = 7.2, 2.4 Hz, 1H), 7.24 – 7.16 (m, 3H), 7.12 – 7.07 (m, 1H), 6.95 (d,  $J$  = 7.2 Hz, 2H), 6.60 (dd,  $J$  = 8.8, 4.0 Hz, 1H), 4.03 (dd,  $J$  = 13.6, 8.0 Hz, 1H), 3.81 (dd,  $J$  = 16.8, 13.6 Hz, 1H), 2.92 (dd,  $J$  = 16.8, 7.6 Hz, 1H), 2.80 (s, 3H). <sup>13</sup>C NMR (100 MHz, CDCl<sub>3</sub>) δ 174.34, 172.38, 160.70, 158.29, 140.25, 131.70, 128.52, 128.46, 127.54, 126.35, 126.27, 117.74, 117.51, 112.44, 112.19, 109.40, 109.32, 86.27, 51.23, 32.05, 25.93. HRMS (ESI): Exact Mass Calcd. for C<sub>18</sub>H<sub>15</sub>FNO<sub>3</sub> (M+H)<sup>+</sup>: 312.1035, Found: 312.1037. HPLC (Chiralpak AD–H column, *n*-hexane/*i*-PrOH = 80/20, flow rate = 1.0 mL/min, retention time:  $t_{\text{major}}$  = 18.068 min,  $t_{\text{minor}}$  = 24.745 min, 93% ee).

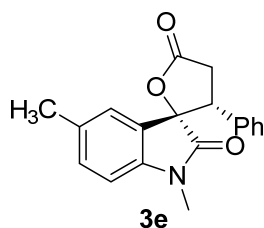

**(2*S*, 3*R*)-1',5'-dimethyl-3-phenyl-3,4-dihydro-5*H*-spiro[furan-2,3'-indoline]-2',5-dione (3e)**

white solid, mp 127 – 130 °C,  $[\alpha]_D^{20}$  -132 (c 1.0, CH<sub>2</sub>Cl<sub>2</sub>). <sup>1</sup>H NMR (400 MHz, CDCl<sub>3</sub>) δ 7.36 (s, 1H), 7.22 – 7.14 (m, 4H), 6.93 (d,  $J$  = 7.2 Hz, 2H), 6.55 (d,  $J$  = 8.0 Hz 1H), 4.06 (dd,  $J$  = 13.6, 8.0 Hz, 1H), 3.81 (dd,  $J$  = 16.8, 13.6 Hz, 1H), 2.90 (dd,  $J$  = 16.8, 8.0 Hz, 1H), 2.79 (s, 3H), 2.41 (s, 3H). <sup>13</sup>C NMR (100 MHz, CDCl<sub>3</sub>) δ 174.80, 172.51, 141.94, 133.17, 132.24, 131.50, 128.38, 128.19, 127.52, 124.81, 124.74, 108.33, 86.55, 50.87, 32.21, 25.78, 21.10. HRMS (ESI): Exact Mass Calcd. for C<sub>19</sub>H<sub>18</sub>NO<sub>3</sub> (M+H)<sup>+</sup>: 308.1281, Found: 308.1277. HPLC (Chiralpak AD–H column, *n*-hexane/*i*-PrOH = 80/20, flow rate = 1.0 mL/min, retention time:  $t_{\text{major}}$  = 18.146 min,  $t_{\text{minor}}$  = 36.620 min, 97% ee).

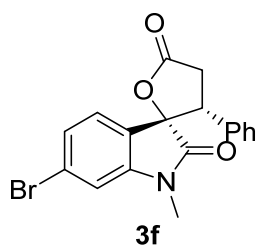

**(2*S*, 3*R*)-6'-bromo-1'-methyl-3-phenyl-3,4-dihydro-5*H*-spiro[furan-2,3'-indoline]-2',5-dione (3f)**

white solid, mp 189 – 192 °C,  $[\alpha]_D^{20}$  -131 (c 1.0, CH<sub>2</sub>Cl<sub>2</sub>). <sup>1</sup>H NMR (400 MHz, CDCl<sub>3</sub>) δ 7.40 (d,  $J$  = 8.0 Hz, 1H), 7.35 (dd,  $J$  = 8.0, 1.6 Hz, 1H), 7.23 – 7.17 (m, 3H), 6.94 (d,  $J$  = 8.0 Hz, 2H), 6.83 (d,  $J$  = 1.6 Hz, 1H), 4.04 (dd,  $J$  = 13.6, 8.0 Hz, 1H), 3.80 (dd,  $J$  = 16.8, 13.6 Hz, 1H), 2.92 (dd,  $J$  = 16.8, 8.0 Hz, 1H), 2.80 (s, 3H). <sup>13</sup>C NMR (100 MHz, CDCl<sub>3</sub>) δ 174.44, 172.44, 145.51, 131.65, 128.58, 128.47, 127.50, 126.35, 125.38, 125.11, 123.63, 112.24, 85.95, 50.90, 32.04, 25.92. HRMS (ESI): Exact Mass Calcd. for C<sub>18</sub>H<sub>15</sub>BrNO<sub>3</sub> (M+H)<sup>+</sup>: 372.0230, Found: 372.0238. HPLC (Chiralpak AD–H column, *n*-hexane/*i*-PrOH = 70/30, flow rate = 1.0 mL/min, retention time:  $t_{\text{major}}$  = 8.964 min,  $t_{\text{minor}}$  = 12.685 min, 97% ee).

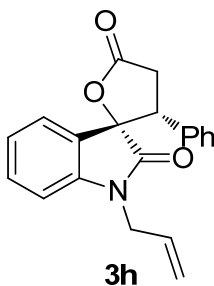

**(2S, 3R)-1'-allyl-3-phenyl-3,4-dihydro-5H-spiro[furan-2,3'-indoline]-2',5-dione (3h)**

white solid, mp 163 – 165 °C,  $[\alpha]_D^{20}$  –113 (c 1.0, CH<sub>2</sub>Cl<sub>2</sub>). <sup>1</sup>H NMR (400 MHz, CDCl<sub>3</sub>) δ 7.56 (d, *J* = 7.2 Hz, 1H), 7.35 (t, *J* = 7.6 Hz, 1H), 7.23 – 7.15 (m, 4H), 6.95 (d, *J* = 7.2 Hz, 2H), 6.63 (d, *J* = 8.0 Hz, 1H), 5.26 – 5.16 (m, 1H), 4.82 (d, *J* = 10.4 Hz, 1H), 4.35 (d, *J* = 17.2 Hz, 1H), 4.28 (dd, *J* = 4.0, 2.0 Hz, 1H), 4.24 (dd, *J* = 4.0, 2.0 Hz, 1H), 4.11 (dd, *J* = 14.0, 8.0 Hz, 1H), 3.85 (dd, *J* = 16.8, 14.0 Hz, 1H), 3.71 (dd, *J* = 16.8, 5.6 Hz, 1H), 2.92 (dd, *J* = 16.8, 8.0 Hz, 1H). <sup>13</sup>C NMR (100 MHz, CDCl<sub>3</sub>): δ 174.78, 172.33, 143.57, 131.94, 131.16, 129.96, 128.54, 128.30, 127.76, 124.61, 124.17, 123.41, 116.98, 109.52, 86.41, 51.10, 41.95, 32.06. HRMS (ESI): Exact Mass Calcd. for C<sub>20</sub>H<sub>18</sub>NO<sub>3</sub> (M+H)<sup>+</sup>: 320.1281, Found: 320.1285. HPLC (Chiralpak AD–H column, *n*-hexane/*i*-PrOH = 80/20, flow rate = 1.0 mL/min, retention time: *t*<sub>minor</sub> = 15.607 min, *t*<sub>major</sub> = 17.554 min, 94% ee).

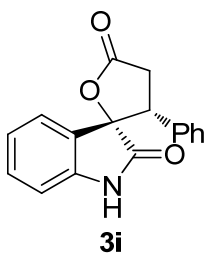

**(2S, 3R)-3-phenyl-3,4-dihydro-5H-spiro[furan-2,3'-indoline]-2',5-dione (3i)**

white solid, mp 111 – 114 °C,  $[\alpha]_D^{20}$  –89 (c 1.0, CH<sub>2</sub>Cl<sub>2</sub>). <sup>1</sup>H NMR (400 MHz, CDCl<sub>3</sub>) δ 7.54 (d, *J* = 7.2 Hz, 1H), 7.35 – 7.31 (m, 1H), 7.23 – 7.16 (m, 4H), 7.04 (br s, 1H), 6.97 (d, *J* = 7.2 Hz, 2H), 6.71 (d, *J* = 7.6 Hz, 1H), 4.09 (dd, *J* = 13.6, 8.0 Hz, 1H), 3.79 (dd, *J* = 16.8, 13.6 Hz, 1H), 2.92 (dd, *J* = 16.8, 8.0 Hz, 1H). <sup>13</sup>C NMR (100 MHz, CDCl<sub>3</sub>) δ 174.67, 173.98, 141.28, 132.00, 131.31, 128.62, 128.37, 127.65, 125.07, 124.67, 123.58, 110.38, 86.32, 50.94, 32.11. HRMS (ESI): Exact Mass Calcd. for C<sub>17</sub>H<sub>14</sub>NO<sub>3</sub> (M+H)<sup>+</sup>: 280.0968, Found: 280.0964. HPLC (Chiralpak AD–H column, *n*-hexane/*i*-PrOH = 80/20, flow rate = 1.0 mL/min, retention time: *t*<sub>major</sub> = 8.706 min, *t*<sub>minor</sub> = 24.000 min, 95% ee).

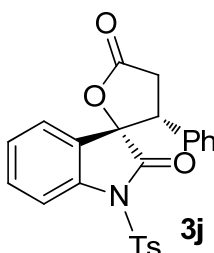

**(2*S*, 3*R*)-3-phenyl-1'-tosyl-3,4-dihydro-5*H*-spiro[furan-2,3'-indoline]-2',5-dione (3j)**

white solid, mp 202 – 204 °C,  $[\alpha]_D^{20}$  –102 (c 1.0, CH<sub>2</sub>Cl<sub>2</sub>). <sup>1</sup>H NMR (400 MHz, CDCl<sub>3</sub>) δ 7.75 (d, *J* = 8.0 Hz, 1H), 7.72 (d, *J* = 8.4 Hz, 2H), 7.55 (d, *J* = 7.6 Hz, 1H), 7.49 – 7.45 (m, 1H), 7.34 (t, *J* = 7.6 Hz, 1H), 7.23 (d, *J* = 8.4 Hz, 2H), 7.19 (d, *J* = 7.6 Hz, 1H), 7.11 (t, *J* = 7.6 Hz, 2H), 6.81 (d, *J* = 7.6 Hz, 2H), 4.01 (dd, *J* = 13.6, 8.0 Hz, 1H), 3.67 (dd, *J* = 17.2, 13.6 Hz, 1H), 2.90 (dd, *J* = 17.2, 8.0 Hz, 1H), 2.42 (s, 3H). <sup>13</sup>C NMR (100 MHz, CDCl<sub>3</sub>) δ 173.80, 171.40, 145.87, 139.94, 134.46, 131.97, 130.57, 129.90, 128.81, 128.68, 127.77, 127.29, 125.67, 124.52, 123.89, 113.79, 85.77, 51.94, 31.66, 21.70. HRMS (ESI): Exact Mass Calcd. for C<sub>24</sub>H<sub>20</sub>NO<sub>5</sub>S (M+H)<sup>+</sup>: 434.1057, Found: 434.1066. HPLC (Chiralpak AD–H column, *n*-hexane/*i*-PrOH = 70/30, flow rate = 1.0 mL/min, retention time: *t*<sub>major</sub> = 13.383 min, *t*<sub>minor</sub> = 18.311 min, 87% ee).

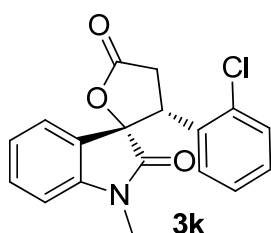

**(2*S*, 3*R*)-3-(2-chlorophenyl)-1'-methyl-3,4-dihydro-5*H*-spiro[furan-2,3'-indoline]-2',5-dione (3k)**

white solid, mp 122 – 125 °C,  $[\alpha]_D^{20}$  –141 (c 1.0, CH<sub>2</sub>Cl<sub>2</sub>). <sup>1</sup>H NMR (400 MHz, CDCl<sub>3</sub>) δ 7.63 (d, *J* = 8.0 Hz, 1H), 7.57 (d, *J* = 7.6 Hz, 1H), 7.36 – 7.32 (m, 1H), 7.25 – 7.21 (m, 1H), 7.19 – 7.12 (m, 3H), 6.65 (d, *J* = 7.6 Hz, 1H), 4.83 (dd, *J* = 13.6, 8.4 Hz, 1H), 3.66 (dd, *J* = 16.8, 13.6 Hz, 1H), 2.97 (dd, *J* = 16.8, 8.4 Hz, 1H), 2.91 (s, 3H). <sup>13</sup>C NMR (100 MHz, CDCl<sub>3</sub>) δ 174.31, 172.93, 143.91, 134.91, 131.23, 130.18, 129.83, 129.34, 129.03, 126.98, 125.67, 123.82, 123.22, 108.47, 86.37, 45.24, 34.21, 25.98. HRMS (ESI): Exact Mass Calcd. for C<sub>18</sub>H<sub>15</sub>ClNO<sub>3</sub> (M+H)<sup>+</sup>: 328.0735, Found: 328.0739. HPLC (Chiralpak AD–H column, *n*-hexane/*i*-PrOH = 70/30, flow rate = 1.0 mL/min, retention time: *t*<sub>minor</sub> = 6.835 min, *t*<sub>major</sub> = 10.468 min, 90% ee).

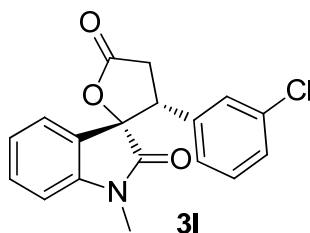

**(2*S*, 3*R*)-3-(3-chlorophenyl)-1'-methyl-3,4-dihydro-5*H*-spiro[furan-2,3'-indoline]-2',5-dione (3l)**

white solid, mp 134 – 137 °C,  $[\alpha]_D^{20}$  –127 (c 1.0, CH<sub>2</sub>Cl<sub>2</sub>),  $[\alpha]_D^{20}$  –97 (c 1.0, CH<sub>2</sub>Cl<sub>2</sub>). <sup>1</sup>H NMR (400 MHz, CDCl<sub>3</sub>) δ 7.53 (d, *J* = 7.2 Hz, 1H), 7.42 (t, *J* = 8.0 Hz, 1H), 7.24 – 7.18 (m, 2H), 7.11 (t, *J* = 8.0 Hz, 1H), 6.89 (s, 1H), 6.84 (d, *J* = 7.6 Hz, 1H), 6.72 (d, *J* = 7.6 Hz, 1H), 4.04 (dd, *J* = 14.0, 7.6 Hz, 1H), 3.77 (dd, *J* = 16.8, 14.0 Hz, 1H), 2.92 (dd, *J* = 16.8, 8.0 Hz, 1H), 2.87 (s, 3H). <sup>13</sup>C NMR (100 MHz, CDCl<sub>3</sub>) δ 174.20, 172.31, 144.28, 134.39, 134.35, 131.55, 129.70, 128.50, 127.83, 125.67, 124.35, 124.12, 123.68, 108.77, 86.05, 50.42, 32.17, 25.90. HRMS (ESI): Exact Mass Calcd. for C<sub>18</sub>H<sub>15</sub>ClNO<sub>3</sub> (M+H)<sup>+</sup>: 328.0735, Found:



328.0732. HPLC (Chiralpak AD-H column, *n*-hexane/*i*-PrOH = 90/10, flow rate = 1.0 mL/min, retention time:  $t_{\text{major}} = 47.098$  min,  $t_{\text{minor}} = 52.457$  min, 94% ee).

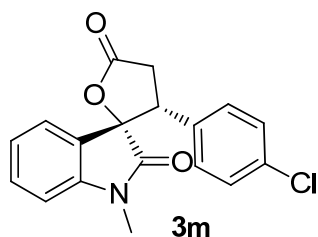

**(2S, 3R)-3-(4-chlorophenyl)-1'-methyl-3,4-dihydro-5H-spiro[furan-2,3'-indoline]-2',5-dione (3m)**

white solid, mp 193 – 196 °C,  $[\alpha]_{\text{D}}^{20} -133$  (c 1.0, CH<sub>2</sub>Cl<sub>2</sub>). <sup>1</sup>H NMR (400 MHz, CDCl<sub>3</sub>) δ 7.53 (d,  $J = 7.2$  Hz, 1H), 7.42 – 7.38 (m, 1H), 7.21 (t,  $J = 7.6$  Hz, 1H), 7.14 (d,  $J = 8.8$  Hz, 2H), 6.87 (d,  $J = 8.4$  Hz, 2H), 6.70 (d,  $J = 8.0$  Hz, 1H), 4.04 (dd,  $J = 13.6, 8.0$  Hz, 1H), 3.76 (dd,  $J = 16.8, 14.0$  Hz, 1H), 2.91 (dd,  $J = 16.8, 8.0$  Hz, 1H), 2.86 (s, 3H). <sup>13</sup>C NMR (100 MHz, CDCl<sub>3</sub>) δ 174.31, 172.40, 144.27, 134.23, 131.46, 130.67, 128.96, 128.64, 124.36, 124.12, 123.60, 108.76, 86.11, 50.31, 32.27, 25.90. HRMS (ESI): Exact Mass Calcd. for C<sub>18</sub>H<sub>15</sub>ClNO<sub>3</sub> (M+H)<sup>+</sup>: 328.0735, Found: 328.0730. HPLC (Chiralpak AD-H column, *n*-hexane/*i*-PrOH = 70/30, flow rate = 1.0 mL/min, retention time:  $t_{\text{major}} = 25.633$  min,  $t_{\text{minor}} = 38.990$  min, 94% ee).

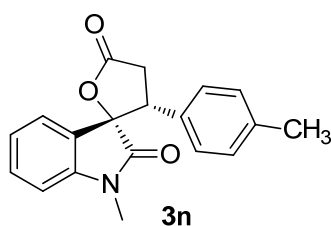

**(2S, 3R)-1'-methyl-3-(*p*-tolyl)-3,4-dihydro-5H-spiro[furan-2,3'-indoline]-2',5-dione (3n)**

white solid, mp 148 – 151 °C,  $[\alpha]_{\text{D}}^{20} -143$  (c 1.0, CH<sub>2</sub>Cl<sub>2</sub>). <sup>1</sup>H NMR (400 MHz, CDCl<sub>3</sub>) δ 7.52 (d,  $J = 7.2$  Hz, 1H), 7.40 – 7.36 (m, 1H), 7.21 – 7.17 (m, 1H), 6.96 (d,  $J = 8.0$  Hz, 2H), 6.81 (d,  $J = 8.4$  Hz, 2H), 6.67 (d,  $J = 8.0$  Hz, 1H), 4.04 (dd,  $J = 13.6, 8.0$  Hz, 1H), 3.79 (dd,  $J = 16.8, 13.6$  Hz, 1H), 2.89 (dd,  $J = 16.8, 8.0$  Hz, 1H), 2.84 (s, 3H), 2.24 (s, 3H). <sup>13</sup>C NMR (100 MHz, CDCl<sub>3</sub>) δ 174.89, 172.67, 144.36, 137.98, 131.19, 129.10, 128.99, 127.39, 124.84, 124.11, 123.41, 108.57, 86.41, 50.63, 32.36, 25.82, 20.97. HRMS (ESI): Exact Mass Calcd. for C<sub>19</sub>H<sub>18</sub>NO<sub>3</sub> (M+H)<sup>+</sup>: 308.1281, Found: 308.1288. HPLC (Chiralpak AD-H column, *n*-hexane/*i*-PrOH = 70/30, flow rate = 1.0 mL/min, retention time:  $t_{\text{major}} = 8.964$  min,  $t_{\text{minor}} = 12.685$  min, 97% ee).

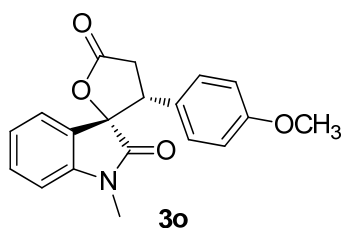

**(2S, 3R)-3-(4-methoxyphenyl)-1'-methyl-3,4-dihydro-5H-spiro[furan-2,3'-indoline]-2',5-dione (3o)**

white solid, mp 172 – 174 °C,  $[\alpha]_D^{20}$  –101 (c 1.0, CH<sub>2</sub>Cl<sub>2</sub>). <sup>1</sup>H NMR (400 MHz, CDCl<sub>3</sub>) δ 7.52 (d, *J* = 7.6 Hz, 1H), 7.40 – 7.36 (m, 1H), 7.19 (t, *J* = 7.6 Hz, 1H), 6.85 (d, *J* = 8.8 Hz, 2H), 6.69 – 6.66 (m, 3H), 4.02 (dd, *J* = 14.0, 8.0 Hz, 1H), 3.80 – 3.72 (m, 4H), 2.91 – 2.85 (m, 4H). <sup>13</sup>C NMR (100 MHz, CDCl<sub>3</sub>) δ 174.86, 172.71, 159.39, 144.34, 131.20, 128.68, 124.81, 124.09, 123.92, 123.42, 113.77, 108.57, 86.44, 55.15, 50.36, 32.46, 25.85. HRMS (ESI): Exact Mass Calcd. for C<sub>19</sub>H<sub>18</sub>NO<sub>4</sub> (M+H)<sup>+</sup>: 324.1230, Found: 324.1233. HPLC (Chiralpak AD–H column, *n*-hexane/*i*-PrOH = 70/30, flow rate = 1.0 mL/min, retention time: *t*<sub>major</sub> = 13.343 min, *t*<sub>minor</sub> = 18.061 min, 95% ee).

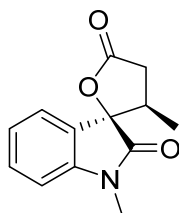

**(2R, 3R)-1',3-dimethyl-3H-spiro[furan-2,3'-indoline]-2',5(4H)-dione (3p)**

Off-white solid,  $[\alpha]_D^{20}$  +107 (c 0.31, CHCl<sub>3</sub>). <sup>1</sup>H NMR (400 MHz, CDCl<sub>3</sub>) δ 7.42 (td, *J* = 8.0, 1.2 Hz, 1H), 7.35 (d, *J* = 7.6 Hz, 1H), 7.14 (td, *J* = 7.6, 0.4 Hz, 1H), 6.86 (d, *J* = 8.0 Hz, 1H), 3.20 (s, 3H), 3.03 (dd, *J* = 16.4, 12.8 Hz, 1H), 2.94 – 2.84 (m, 1H), 2.72 (dd, *J* = 16.4, 8.0 Hz, 1H), 1.00 (d, *J* = 6.4 Hz, 3H). <sup>13</sup>C NMR (100 MHz, CDCl<sub>3</sub>) δ 175.40, 173.05, 144.57, 131.15, 124.84, 124.22, 123.49, 108.60, 86.07, 40.26, 34.98, 26.18, 12.58. HRMS (ESI): Exact Mass Calcd. for C<sub>13</sub>H<sub>13</sub>NO<sub>3</sub>Na (M+Na)<sup>+</sup>: 254.0788, Found: 254.0791. HPLC (Chiralpak AD–H column, *n*-hexane/*i*-PrOH = 70/30, flow rate = 1.0 mL/min, retention time: *t*<sub>minor</sub> = 19.954 min, *t*<sub>major</sub> = 22.269 min, 95% ee).

**4. Characterization of compounds 5a–5i and 7a–7b**

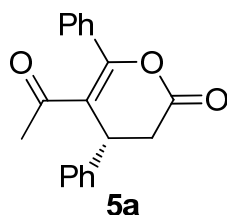

**(R)-5-acetyl-4,6-diphenyl-3,4-dihydro-2H-pyran-2-one (5a)**

white solid, mp 136 – 140 °C,  $[\alpha]_D^{20}$  –176 (c 1.0, CH<sub>2</sub>Cl<sub>2</sub>). <sup>1</sup>H NMR (400 MHz, CDCl<sub>3</sub>) δ 7.62 (d, *J* = 8.4 Hz, 2H), 7.54 – 7.50 (m, 1H), 7.39 (t, *J* = 7.6 Hz, 2H), 7.29 – 7.20 (m, 3H), 7.14 (d, *J* = 8.4 Hz, 2H), 4.32 (dd, *J* = 7.2, 3.2 Hz, 1H), 3.07 (dd, *J* = 16.0, 7.6 Hz, 1H), 2.93 (dd, *J* = 16.0, 3.6 Hz, 1H), 1.90 (s, 3H). <sup>13</sup>C NMR (100 MHz, CDCl<sub>3</sub>) δ 195.78, 166.49, 154.74, 139.97, 138.42, 133.06, 129.13, 128.78, 128.71, 127.62, 126.76, 117.75, 39.41, 36.19, 18.99. HRMS (ESI): Exact Mass Calcd. for C<sub>19</sub>H<sub>17</sub>O<sub>3</sub> (M+H)<sup>+</sup>: 293.1172, Found: 293.1181. HPLC (Chiralpak OD–H column, *n*-hexane/*i*-PrOH = 80/20, flow rate = 1.0 mL/min, retention time: *t*<sub>minor</sub> = 10.650 min, *t*<sub>major</sub> = 12.607 min, 95% ee).

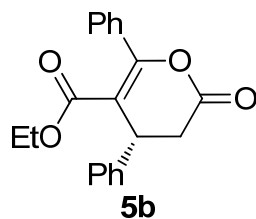

**ethyl (*R*)-2-oxo-4,6-diphenyl-3,4-dihydro-2*H*-pyran-5-carboxylate (5b)**

white solid, mp 131–134 °C,  $[\alpha]_D^{20}$   $-134$  (c 1.0, CH<sub>2</sub>Cl<sub>2</sub>). <sup>1</sup>H NMR (400 MHz, CDCl<sub>3</sub>)  $\delta$  7.52 – 7.50 (m, 2H), 7.47 – 7.39 (m, 3H), 7.36 – 7.32 (m, 2H), 7.29 – 7.28 (m, 2H), 7.27 – 7.25 (m, 1H), 4.41 (dd,  $J = 7.6$ , 2.4 Hz, 1H), 3.93 (q,  $J = 2.8$  Hz, 2H), 3.10 (dd,  $J = 16.0$ , 7.6 Hz, 1H), 2.94 (dd,  $J = 16.0$ , 2.4 Hz, 1H), 0.88 (t,  $J = 7.2$  Hz, 3H). <sup>13</sup>C NMR (100 MHz, CDCl<sub>3</sub>)  $\delta$  166.35, 165.96, 158.50, 139.90, 133.11, 130.11, 129.19, 128.63, 127.97, 127.73, 126.75, 111.71, 60.98, 38.87, 36.30, 13.43. HRMS (ESI): Exact Mass Calcd. for C<sub>20</sub>H<sub>19</sub>O<sub>4</sub> (M+H)<sup>+</sup>: 323.1278, Found: 323.1273. HPLC (Chiralpak OD–H column, *n*-hexane/*i*-PrOH = 80/20, flow rate = 1.0 mL/min, retention time:  $t_{\text{minor}} = 12.276$  min,  $t_{\text{major}} = 13.809$  min, 91% ee).

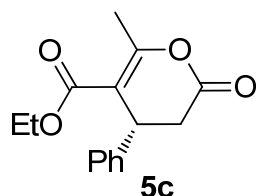

**ethyl (*R*)-6-methyl-2-oxo-4-phenyl-3,4-dihydro-2*H*-pyran-5-carboxylate (5c)**

brown solid, mp 111 – 114 °C,  $[\alpha]_D^{20}$   $-170$  (c 1.0, CH<sub>2</sub>Cl<sub>2</sub>). <sup>1</sup>H NMR (400 MHz, CDCl<sub>3</sub>)  $\delta$  7.31 – 7.28 (m, 2H), 7.25 – 7.21 (m, 1H), 7.14 (d,  $J = 7.2$  Hz, 2H), 4.26 (d,  $J = 7.2$  Hz, 1H), 4.13 (q,  $J = 7.2$  Hz, 2H), 2.95 (dd,  $J = 15.6$ , 7.6 Hz, 1H), 2.82 (dd,  $J = 15.6$ , 2.4 Hz, 1H), 2.47 (s, 3H), 1.19 (t,  $J = 7.2$  Hz, 3H). <sup>13</sup>C NMR (100 MHz, CDCl<sub>3</sub>)  $\delta$  166.09, 165.93, 161.27, 140.63, 128.99, 127.46, 126.57, 110.00, 60.82, 37.82, 36.34, 18.84, 14.02. HRMS (ESI): Exact Mass Calcd. for C<sub>15</sub>H<sub>17</sub>O<sub>4</sub> (M+H)<sup>+</sup>: 261.1121, Found: 261.1127. HPLC (Chiralpak OD–H column, *n*-hexane/*i*-PrOH = 80/20), flow rate = 1.0 mL/min, retention time:  $t_{\text{minor}} = 9.105$  min,  $t_{\text{major}} = 16.704$  min, 95% ee).

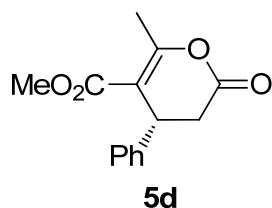

**methyl (*R*)-6-methyl-2-oxo-4-phenyl-3,4-dihydro-2*H*-pyran-5-carboxylate (5d)**

white solid, mp 99 – 102 °C,  $[\alpha]_D^{20}$   $-183$  (c 1.0, CH<sub>2</sub>Cl<sub>2</sub>). <sup>1</sup>H NMR (400 MHz, CDCl<sub>3</sub>)  $\delta$  7.32 – 7.22 (m, 3H), 7.13 (d,  $J = 7.2$  Hz, 2H), 4.26 (d,  $J = 7.2$  Hz, 1H), 3.68 (s, 3H), 2.94 (dd,  $J = 16.0$ , 7.6 Hz, 1H), 2.83 (dd,  $J = 16.0$ , 2.4 Hz, 1H), 2.48 (s, 3H). <sup>13</sup>C NMR (100 MHz, CDCl<sub>3</sub>)  $\delta$  166.42, 165.98, 161.72, 140.39, 129.06, 127.54, 126.55, 109.71, 51.89, 37.73, 36.44, 18.90. HRMS (ESI): Exact Mass Calcd. for C<sub>14</sub>H<sub>15</sub>O<sub>4</sub>

(M+H)<sup>+</sup>: 247.0965, Found: 247.0972. HPLC (Chiralpak OD–H column, *n*-hexane/*i*-PrOH = 80/20, flow rate = 1.0 mL/min, retention time:  $t_{\text{minor}} = 7.831$  min,  $t_{\text{major}} = 16.611$  min, 91% ee).

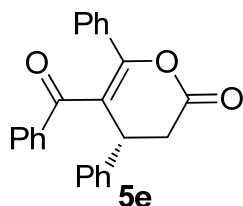

**(R)-5-benzoyl-4,6-diphenyl-3,4-dihydro-2H-pyran-2-one (5e)**

brown solid, mp 201 – 203 °C,  $[\alpha]_{\text{D}}^{20} -86$  (c 1.0, CH<sub>2</sub>Cl<sub>2</sub>). <sup>1</sup>H NMR (400 MHz, CDCl<sub>3</sub>)  $\delta$  7.49 (d,  $J = 7.2$  Hz, 2H), 7.37 (d,  $J = 6.8$  Hz, 2H), 7.30 – 7.21 (m, 6H), 7.18 – 7.06 (m, 5H), 4.56 (dd,  $J = 7.6, 2.4$  Hz, 1H), 3.21 (dd,  $J = 16.0, 7.6$  Hz, 1H), 3.06 (dd,  $J = 16.0, 2.4$  Hz, 1H). <sup>13</sup>C NMR (100 MHz, CDCl<sub>3</sub>)  $\delta$  195.91, 166.65, 154.79, 139.70, 137.08, 132.57, 131.97, 130.27, 129.22, 128.98, 128.04, 127.98, 127.77, 126.84, 118.28, 40.38, 35.93. HRMS (ESI): Exact Mass Calcd. for C<sub>24</sub>H<sub>19</sub>O<sub>3</sub> (M+H)<sup>+</sup>: 355.1329, Found: 355.1334. HPLC (Chiralpak OD–H column, *n*-hexane/*i*-PrOH = 80/20, flow rate = 1.0 mL/min, retention time:  $t_{\text{minor}} = 19.703$  min,  $t_{\text{major}} = 28.502$  min, 91% ee).

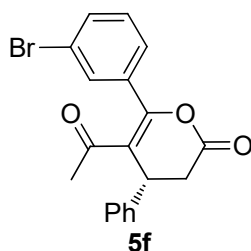

**(R)-5-acetyl-6-(3-bromophenyl)-4-phenyl-3,4-dihydro-2H-pyran-2-one (5f)**

brown solid, mp 131 – 134 °C,  $[\alpha]_{\text{D}}^{20} -98$  (c 1.0, CH<sub>2</sub>Cl<sub>2</sub>). <sup>1</sup>H NMR (400 MHz, CDCl<sub>3</sub>)  $\delta$  7.53 (d,  $J = 8.4$  Hz, 2H), 7.48 (d,  $J = 8.4$  Hz, 2H), 7.28 – 7.21 (m, 3H), 7.11 (d,  $J = 8.4$  Hz, 2H), 4.29 (dd,  $J = 7.2, 3.6$  Hz, 1H), 3.06 (dd,  $J = 16.0, 7.2$  Hz, 1H), 2.93 (dd,  $J = 16.0, 4.0$  Hz, 1H), 1.91 (s, 3H). <sup>13</sup>C NMR (100 MHz, CDCl<sub>3</sub>)  $\delta$  194.37, 166.16, 155.52, 140.22, 139.76, 135.82, 131.56, 130.25, 129.24, 127.78, 127.22, 126.73, 122.97, 117.46, 39.47, 36.19, 19.09. HRMS (ESI): Exact Mass Calcd. for C<sub>19</sub>H<sub>16</sub>BrO<sub>3</sub> (M+H)<sup>+</sup>: 372.0277, Found: 372.0281. HPLC (Chiralpak OD–H column, *n*-hexane/*i*-PrOH = 80/20, flow rate = 1.0 mL/min, retention time:  $t_{\text{minor}} = 15.840$  min,  $t_{\text{major}} = 19.112$  min, 87% ee).

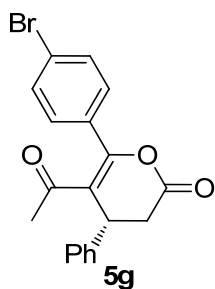

**(R)-5-acetyl-6-(4-bromophenyl)-4-phenyl-3,4-dihydro-2H-pyran-2-one (5g)**

brown solid, mp 142 – 145 °C,  $[\alpha]_D^{20}$  –109 (c 1.0, CH<sub>2</sub>Cl<sub>2</sub>). <sup>1</sup>H NMR (400 MHz, CDCl<sub>3</sub>) δ 7.53 (q, *J* = 8.8 Hz, 2H), 7.48 (q, *J* = 8.4 Hz, 2H), 7.28 – 7.20 (m, 3H), 7.11 (d, *J* = 8.4 Hz, 2H), 4.28 (dd, *J* = 7.2, 3.6 Hz, 1H), 3.06 (dd, *J* = 16.0, 7.2 Hz, 1H), 2.93 (dd, *J* = 16.0, 4.0 Hz, 1H), 1.91 (s, 3H). <sup>13</sup>C NMR (100 MHz, CDCl<sub>3</sub>) δ 194.72, 166.25, 154.81, 139.84, 137.10, 132.07, 130.25, 129.21, 128.29, 127.74, 126.69, 117.46, 39.46, 36.10, 19.06. HRMS (ESI): Exact Mass Calcd. for C<sub>19</sub>H<sub>16</sub>BrO<sub>3</sub> (M+H)<sup>+</sup>: 372.0277, Found: 372.0274. HPLC (Chiralpak OD–H column, *n*-hexane/*i*-PrOH = 80/20), flow rate = 1.0 mL/min, retention time: *t*<sub>minor</sub> = 16.105 min, *t*<sub>major</sub> = 21.732 min, 87% ee).

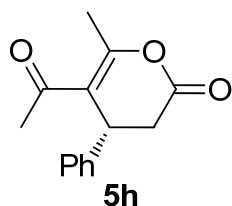

**(R)-5-acetyl-6-methyl-4-phenyl-3,4-dihydro-2H-pyran-2-one (5h)**

white solid, mp 109 – 112 °C,  $[\alpha]_D^{20}$  –182 (c 1.0, CH<sub>2</sub>Cl<sub>2</sub>). <sup>1</sup>H NMR (400 MHz, CDCl<sub>3</sub>) δ 7.36 – 7.32 (m, 2H), 7.29 – 7.28 (m, 1H), 7.15 (d, *J* = 7.2 Hz, 2H), 4.15 (d, *J* = 6.0 Hz, 1H), 2.97 (dd, *J* = 15.6, 7.2 Hz, 1H), 2.84 (dd, *J* = 15.6, 2.4 Hz, 1H), 2.43 (s, 3H), 2.12 (s, 3H). <sup>13</sup>C NMR (100 MHz, CDCl<sub>3</sub>) δ 197.88, 165.56, 160.23, 139.70, 129.43, 127.94, 126.65, 117.28, 38.86, 37.16, 29.75, 19.06. HRMS (ESI): Exact Mass Calcd. for C<sub>14</sub>H<sub>15</sub>O<sub>3</sub> (M+H)<sup>+</sup>: 231.1016, Found: 231.1019. HPLC (Chiralpak OD–H column, *n*-hexane/*i*-PrOH = 80/20, flow rate = 1.0 mL/min, retention time: *t*<sub>minor</sub> = 10.954 min, *t*<sub>major</sub> = 13.941 min, 88% ee).

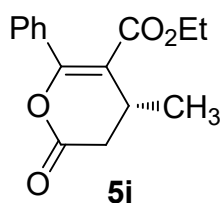

**ethyl (R)-4-methyl-2-oxo-6-phenyl-3,4-dihydro-2H-pyran-5-carboxylate (5i)**

colorless oil,  $[\alpha]_D^{20}$  –101 (c 1.0, CHCl<sub>3</sub>). <sup>1</sup>H NMR (400 MHz, CDCl<sub>3</sub>) δ 7.44 – 7.35 (m, 5H), 4.05 (q, *J* = 7.2 Hz, 2H), 3.24 – 3.17 (m, 1H), 2.85 (dd, *J* = 15.6, 6.8 Hz, 1H), 2.66 (dd, *J* = 15.6, 2.4 Hz, 1H), 1.25 (d, *J* = 6.8 Hz, 3H), 0.99 (t, *J* = 6.8 Hz, 3H). <sup>13</sup>C NMR (100 MHz, CDCl<sub>3</sub>) δ 166.92, 166.66, 157.35, 133.19, 129.88, 128.50, 113.91, 60.88, 35.55, 28.25, 19.17, 13.56. HRMS (ESI): Exact Mass Calcd. for C<sub>15</sub>H<sub>17</sub>O<sub>4</sub> (M+H)<sup>+</sup>: 261.1121, Found: 261.1123. HPLC (Chiralpak OD–H column, *n*-hexane/*i*-PrOH = 95/5, flow rate = 1.0 mL/min, retention time: *t*<sub>minor</sub> = 11.237 min, *t*<sub>major</sub> = 14.681 min, 83% ee).

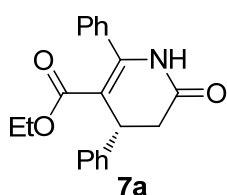

### ethyl (*R*)-6-oxo-2,4-diphenyl-1,4,5,6-tetrahydropyridine-3-carboxylate (**7a**)

white solid, mp 122 – 124 °C,  $[\alpha]_D^{20}$  –144 (c 1.0, CH<sub>2</sub>Cl<sub>2</sub>). <sup>1</sup>H NMR (400 MHz, CDCl<sub>3</sub>) δ 7.42 – 7.30 (m, 9H), 7.25 – 7.23 (m, 1H), 7.19 (br s, 1H), 4.34 (dd, *J* = 8.0, 2.4 Hz, 1H), 3.86 (q, *J* = 7.2 Hz, 2H), 3.06 (dd, *J* = 16.4, 8.0 Hz, 1H), 2.80 (dd, *J* = 16.4, 2.4 Hz, 1H), 0.83 (t, *J* = 7.2 Hz, 3H). <sup>13</sup>C NMR (100 MHz, CDCl<sub>3</sub>) δ 169.53, 166.58, 146.50, 141.71, 135.76, 129.51, 128.87, 128.44, 127.82, 127.11, 126.73, 108.73, 60.16, 38.59, 38.01, 13.49. HRMS (ESI): Exact Mass Calcd. for C<sub>20</sub>H<sub>20</sub>NO<sub>3</sub> (M+H)<sup>+</sup>: 322.1438, Found: 322.3844. HPLC (Chiralpak AD–H column, *n*-hexane/*i*-PrOH = 80/20), flow rate = 1.0 mL/min, retention time: *t*<sub>major</sub> = 15.822 min, *t*<sub>minor</sub> = 29.715 min, 86% ee).

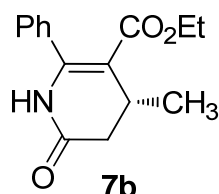

### ethyl (*R*)-4-methyl-6-oxo-2-phenyl-1,4,5,6-tetrahydropyridine-3-carboxylate (**7b**)

white solid, mp 141 – 144 °C,  $[\alpha]_D^{20}$  –128 (c 1.0, CHCl<sub>3</sub>). <sup>1</sup>H NMR (400 MHz, CDCl<sub>3</sub>) δ 7.41 – 7.37 (m, 3H), 7.30 – 7.28 (m, 2H), 7.06 (br s, 1H), 3.95 (q, *J* = 6.8 Hz, 2H), 3.18 – 3.10 (m, 1H), 2.79 (dd, *J* = 16.4, 6.8 Hz, 1H), 2.43 (dd, *J* = 16.4, 0.8 Hz, 1H), 1.25 (d, *J* = 6.8 Hz, 3H), 0.91 (t, *J* = 6.8 Hz, 3H). <sup>13</sup>C NMR (100 MHz, CDCl<sub>3</sub>) δ 170.16, 166.90, 144.83, 135.86, 129.35, 128.38, 127.77, 111.06, 60.03, 37.56, 28.48, 18.72, 13.60. HRMS (ESI): Exact Mass Calcd. for C<sub>15</sub>H<sub>17</sub>NO<sub>3</sub>Na (M+Na)<sup>+</sup>: 282.1101, Found: 282.1102. HPLC (Chiralpak AD–H column, *n*-hexane/*i*-PrOH = 95/5, flow rate = 1.0 mL/min, retention time: *t*<sub>minor</sub> = 13.041 min, *t*<sub>major</sub> = 11.553 min, 75% ee).

## 5. X-Ray crystal structure of compound **3b**

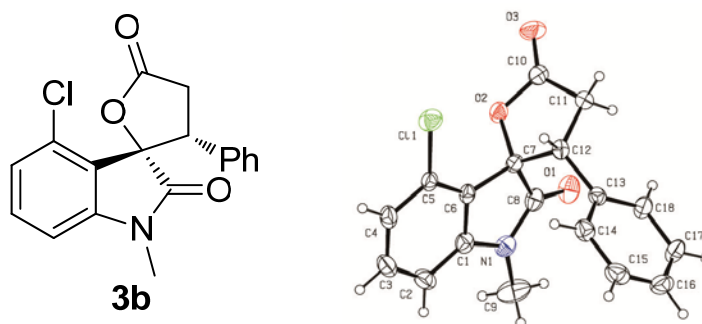

## 6. NMR spectra of compounds 3a–3f, 3h–3p, 5a–5i and 7a–7b

$^1\text{H}$  NMR spectrum of compound **3a** ( $\text{CDCl}_3$ , 400 MHz)

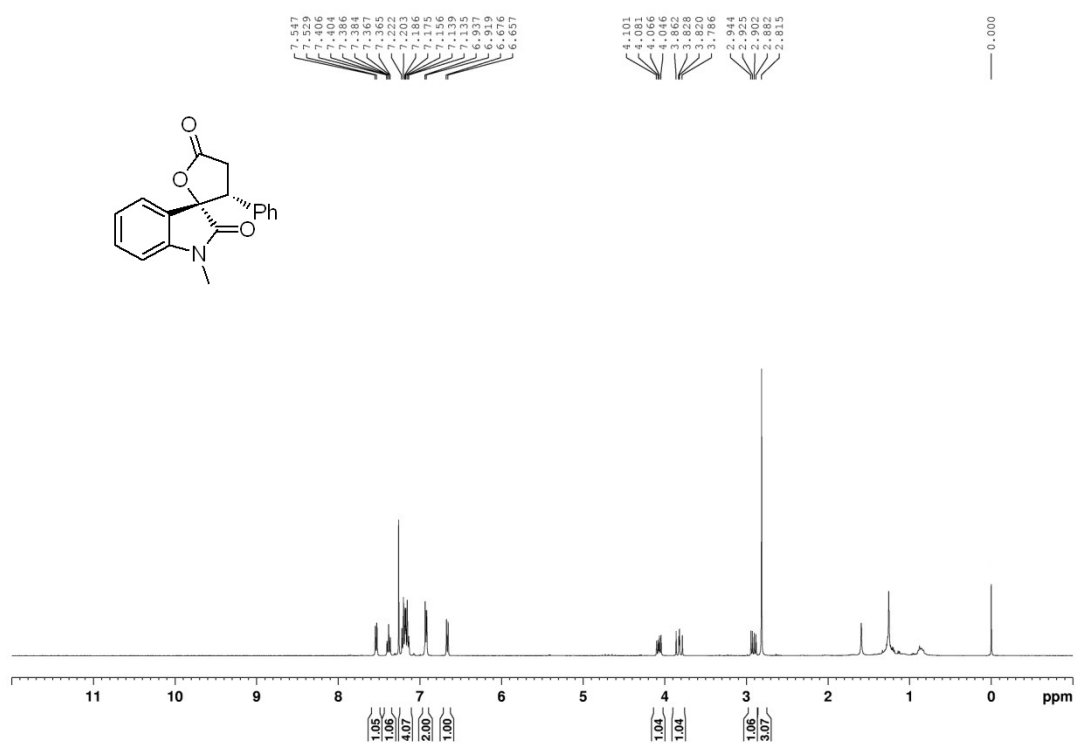

$^{13}\text{C}$  NMR spectrum of compound **3a** ( $\text{CDCl}_3$ , 100 MHz)

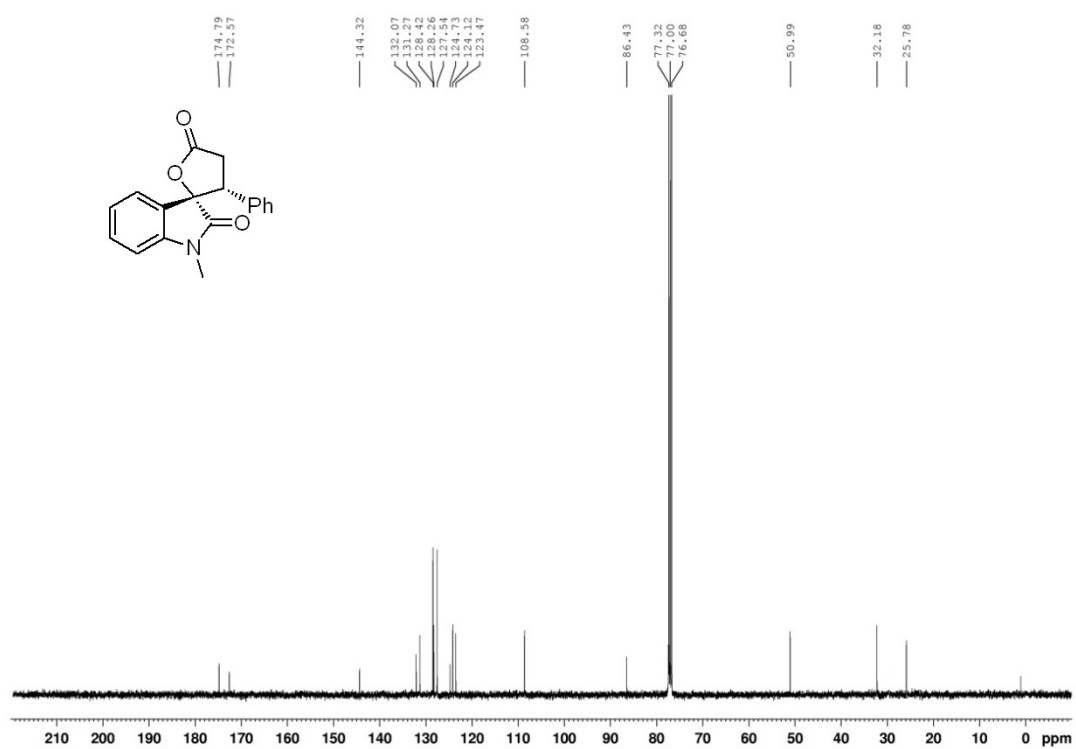

$^1\text{H}$  NMR spectrum of compound **3b** ( $\text{CDCl}_3$ , 400 MHz)

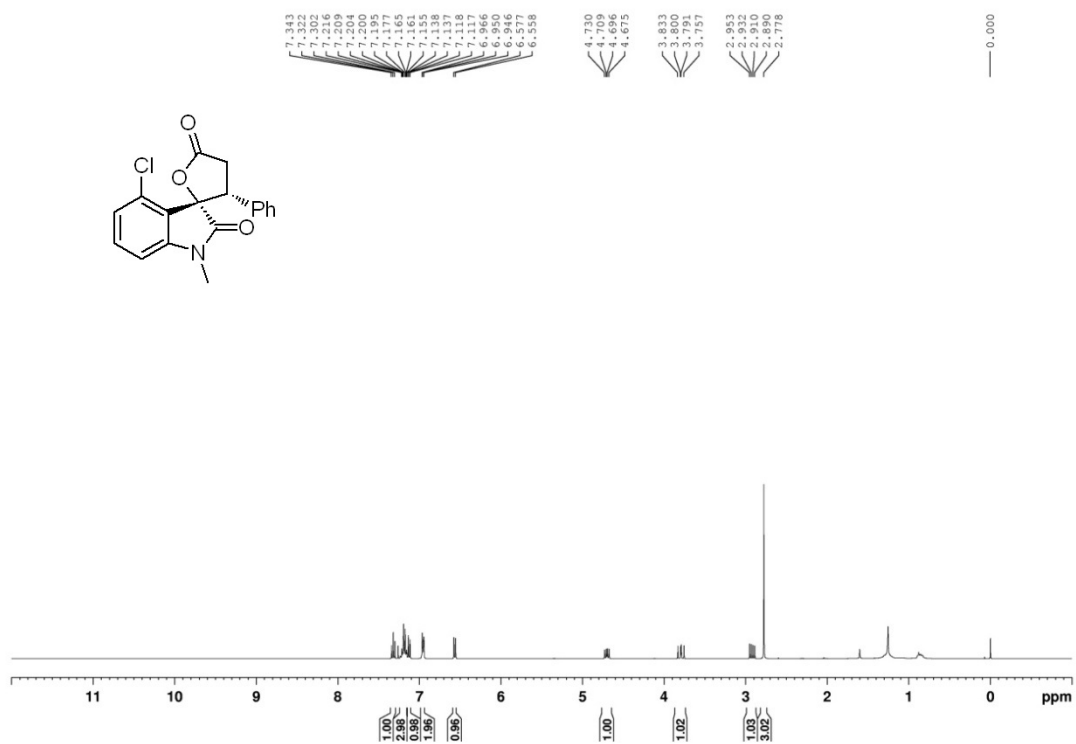

$^{13}\text{C}$  NMR spectrum of compound **3b** ( $\text{CDCl}_3$ , 100 MHz)

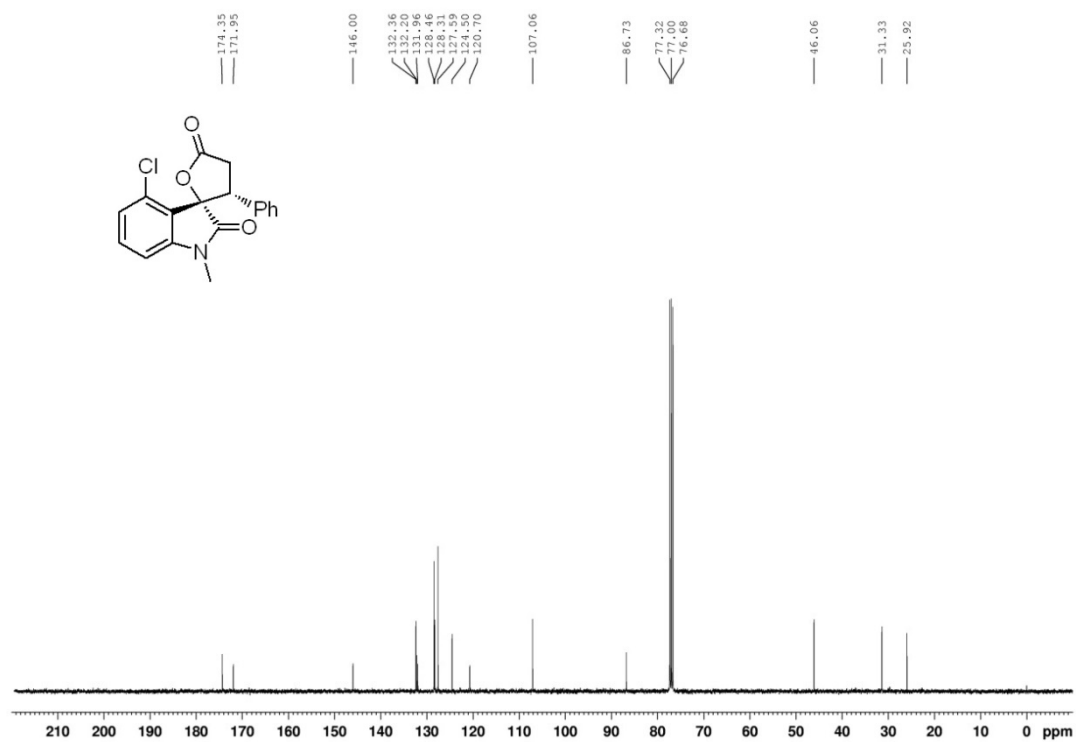



$^1\text{H}$  NMR spectrum of compound **3c** ( $\text{CDCl}_3$ , 400 MHz)

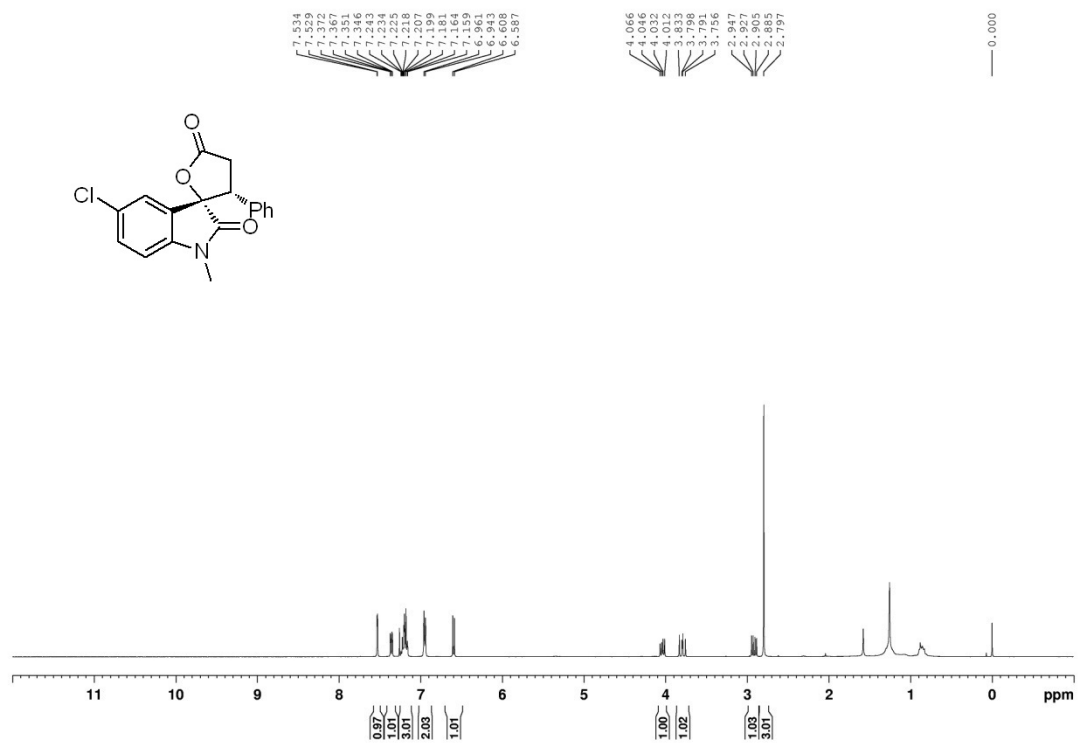

$^{13}\text{C}$  NMR spectrum of compound **3c** ( $\text{CDCl}_3$ , 100 MHz)

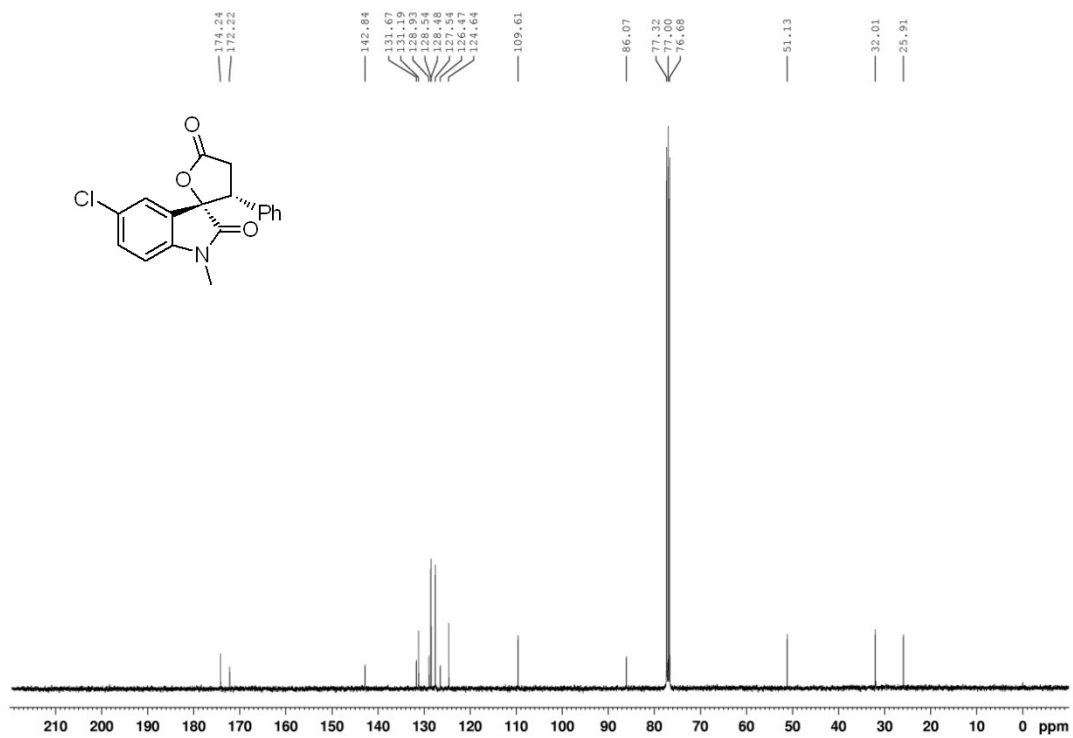

$^1\text{H}$  NMR spectrum of compound **3d** ( $\text{CDCl}_3$ , 400 MHz)

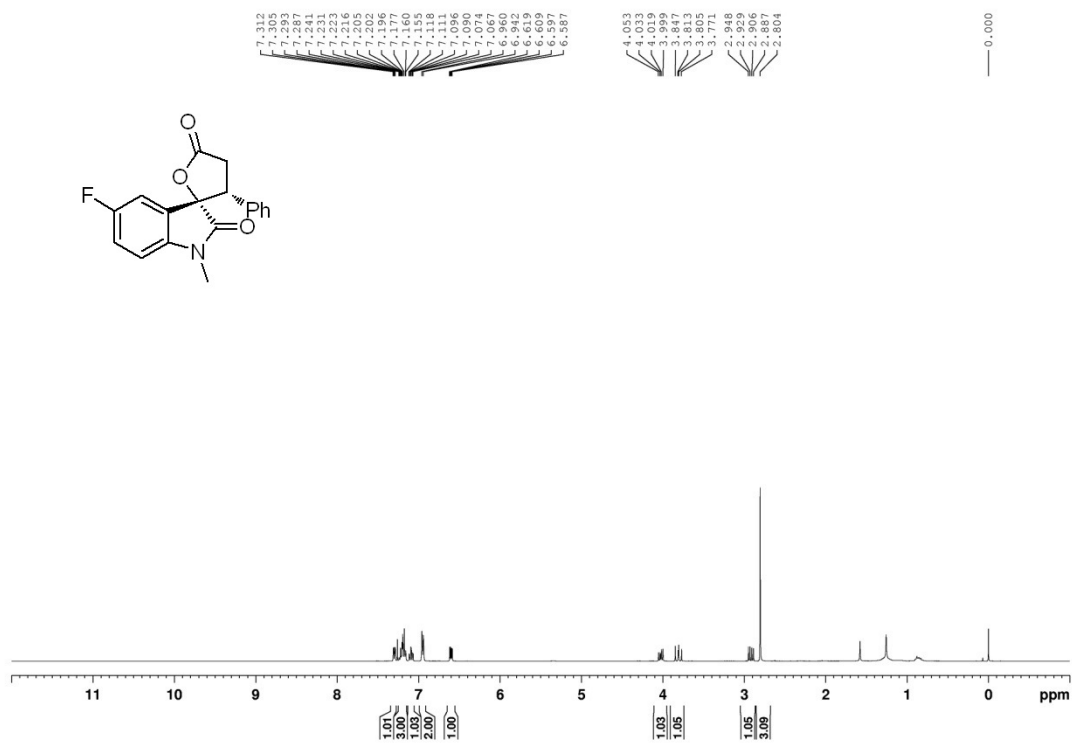

$^{13}\text{C}$  NMR spectrum of compound **3d** ( $\text{CDCl}_3$ , 100 MHz)

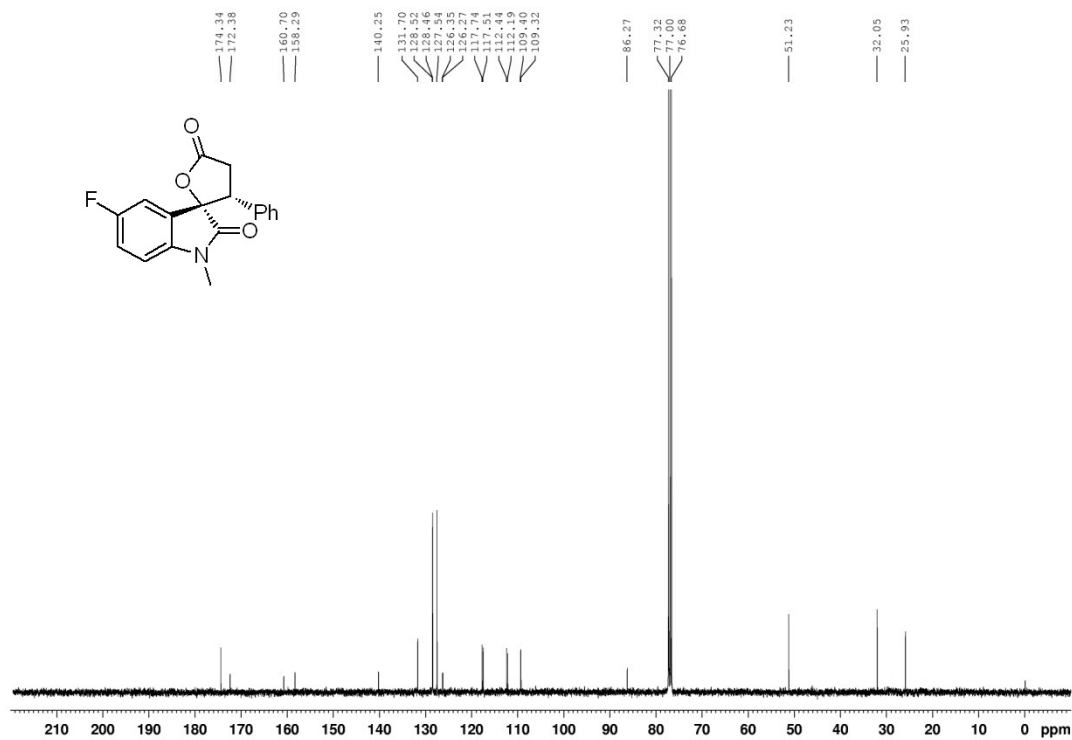

<sup>1</sup>H NMR spectrum of compound **3e** (CDCl<sub>3</sub>, 400 MHz)

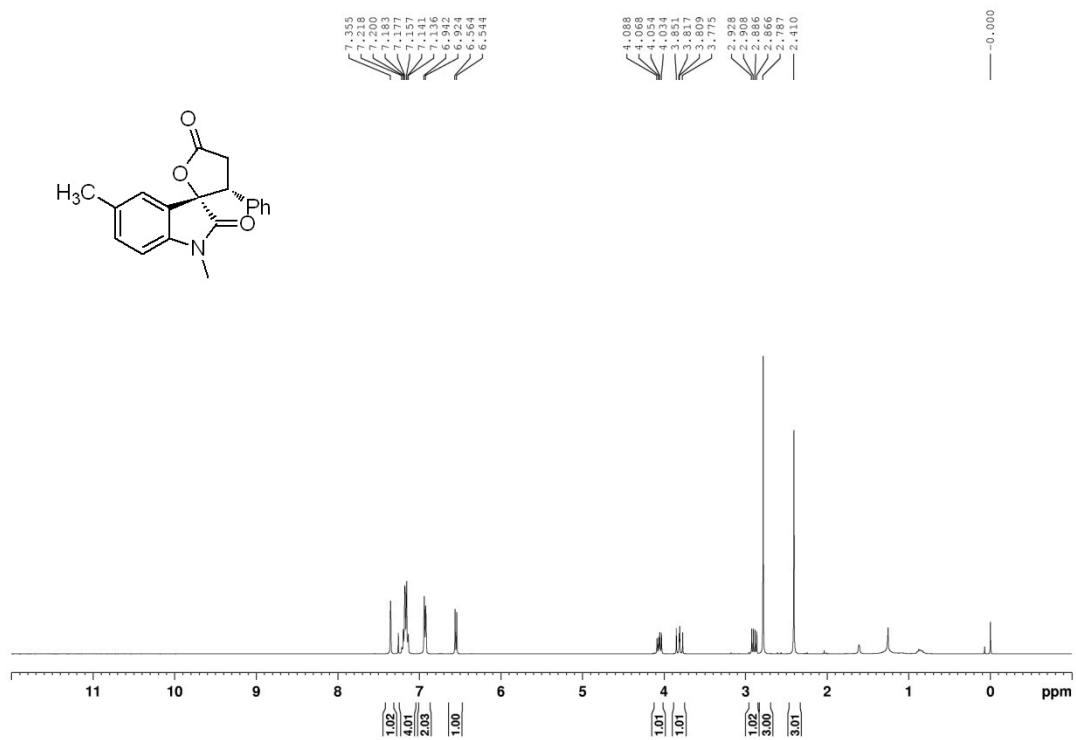

<sup>13</sup>C NMR spectrum of compound **3e** (CDCl<sub>3</sub>, 100 MHz)

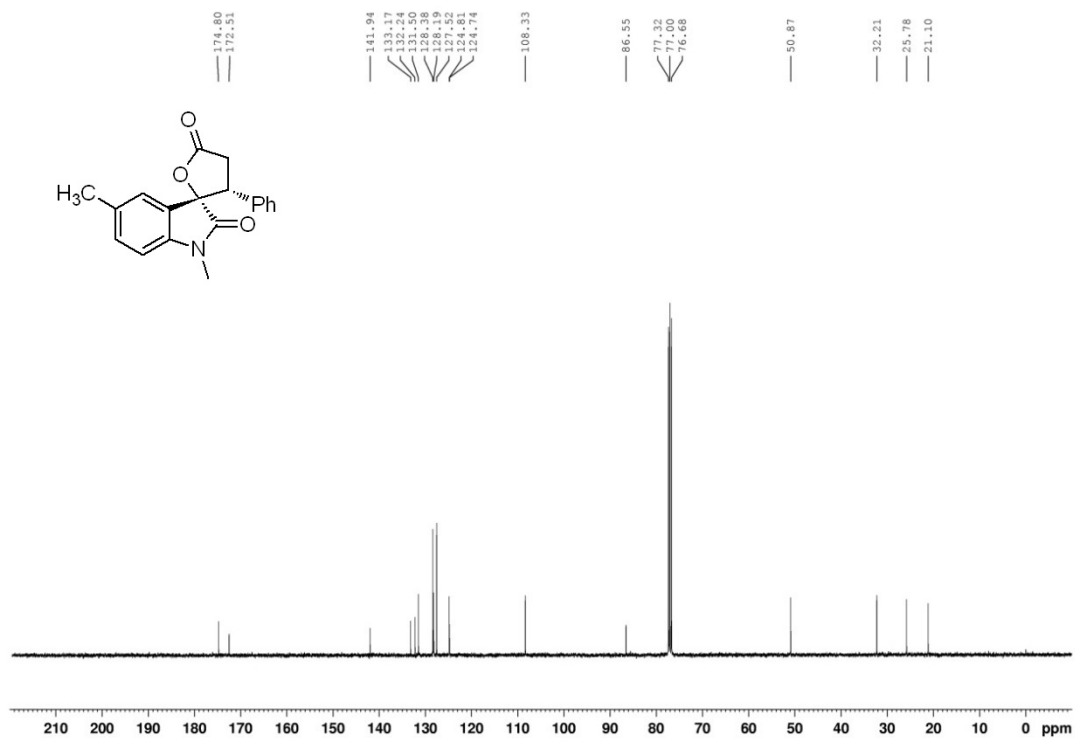

$^1\text{H}$  NMR spectrum of compound **3f** ( $\text{CDCl}_3$ , 400 MHz)

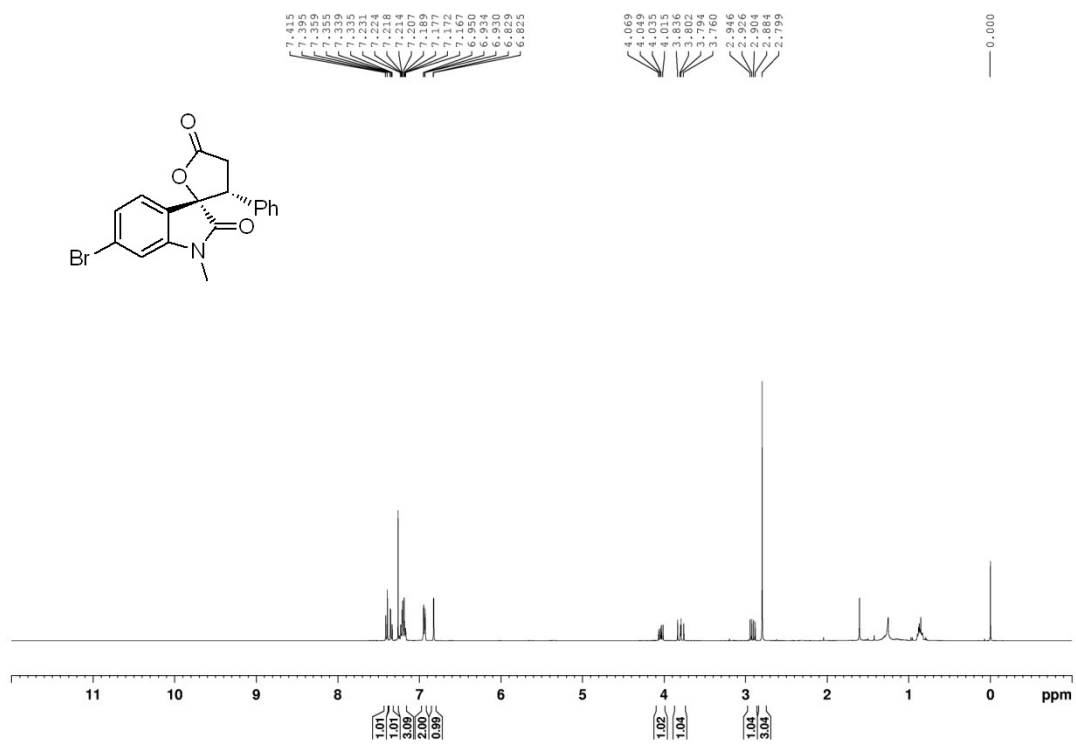

$^{13}\text{C}$  NMR spectrum of compound **3f** ( $\text{CDCl}_3$ , 100 MHz)

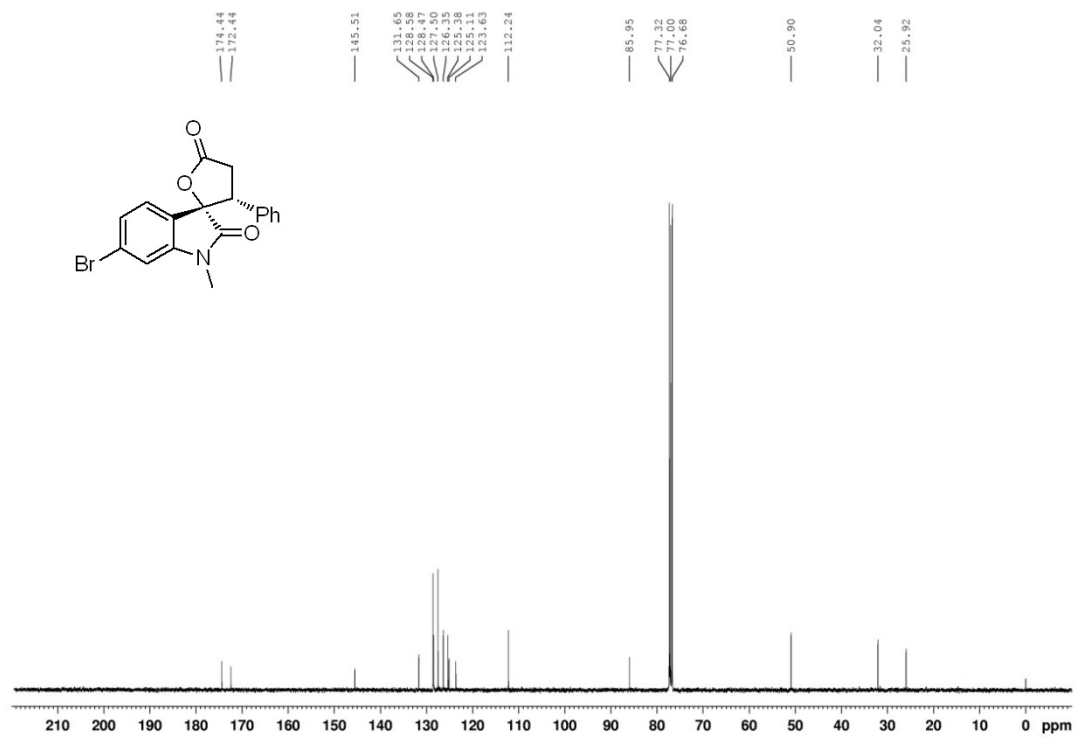

$^1\text{H}$  NMR spectrum of compound **3h** ( $\text{CDCl}_3$ , 400 MHz)

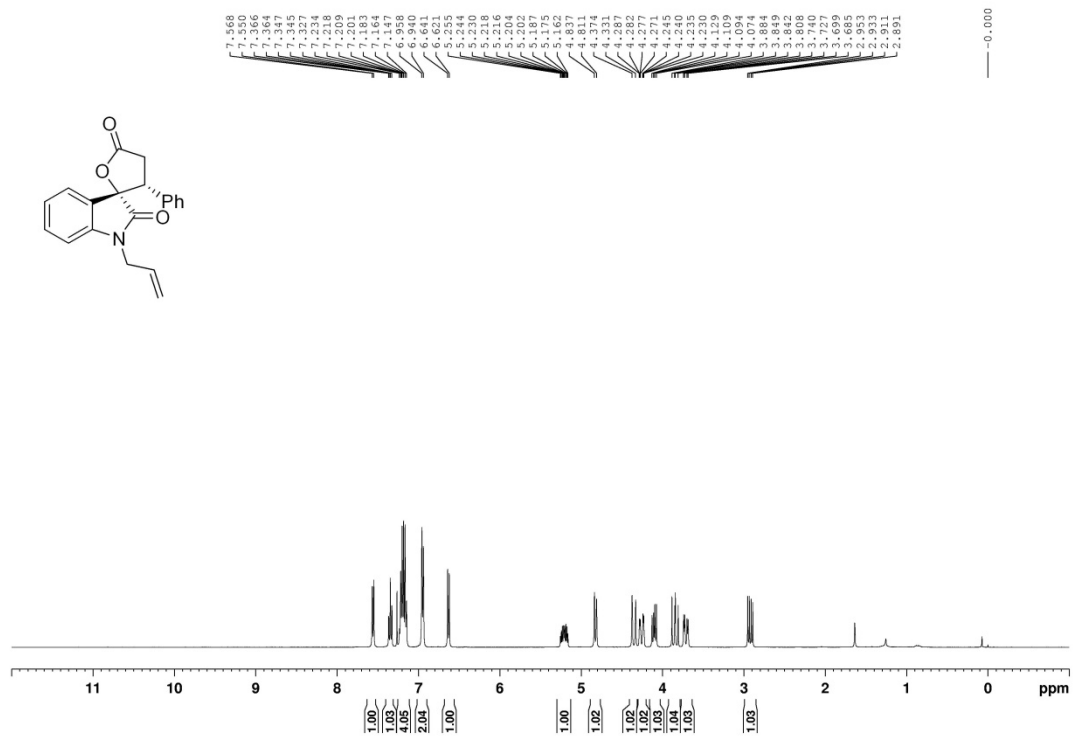

$^{13}\text{C}$  NMR spectrum of compound **3h** ( $\text{CDCl}_3$ , 100 MHz)

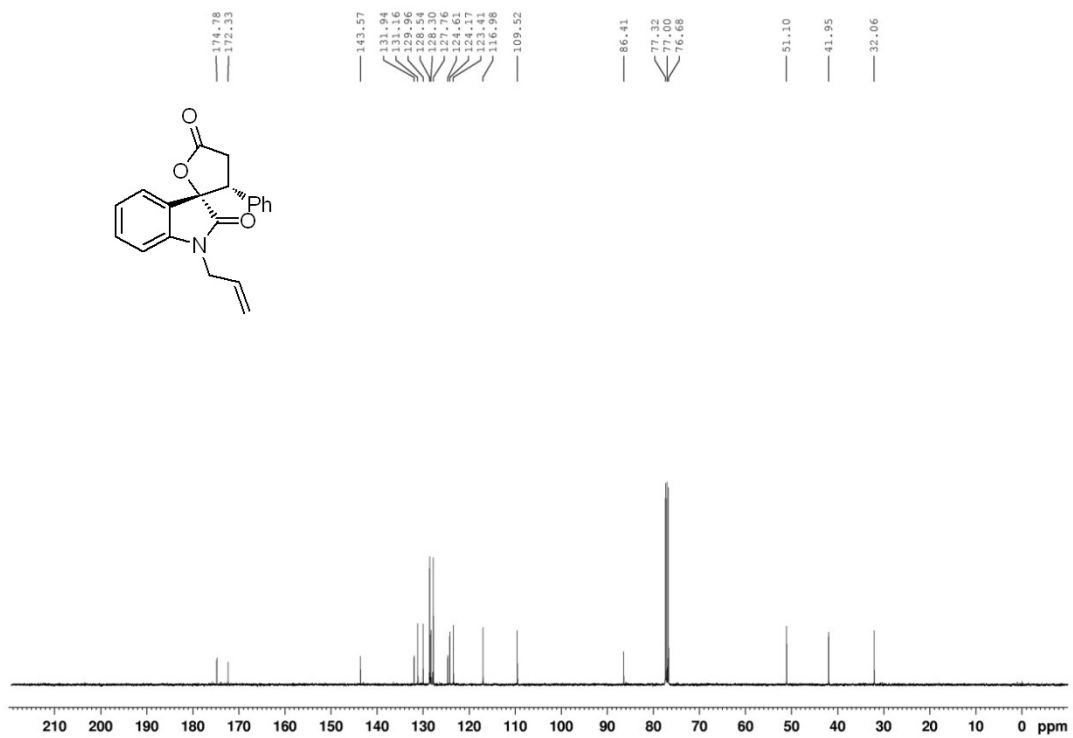

$^1\text{H}$  NMR spectrum of compound **3i** ( $\text{CDCl}_3$ , 400 MHz)

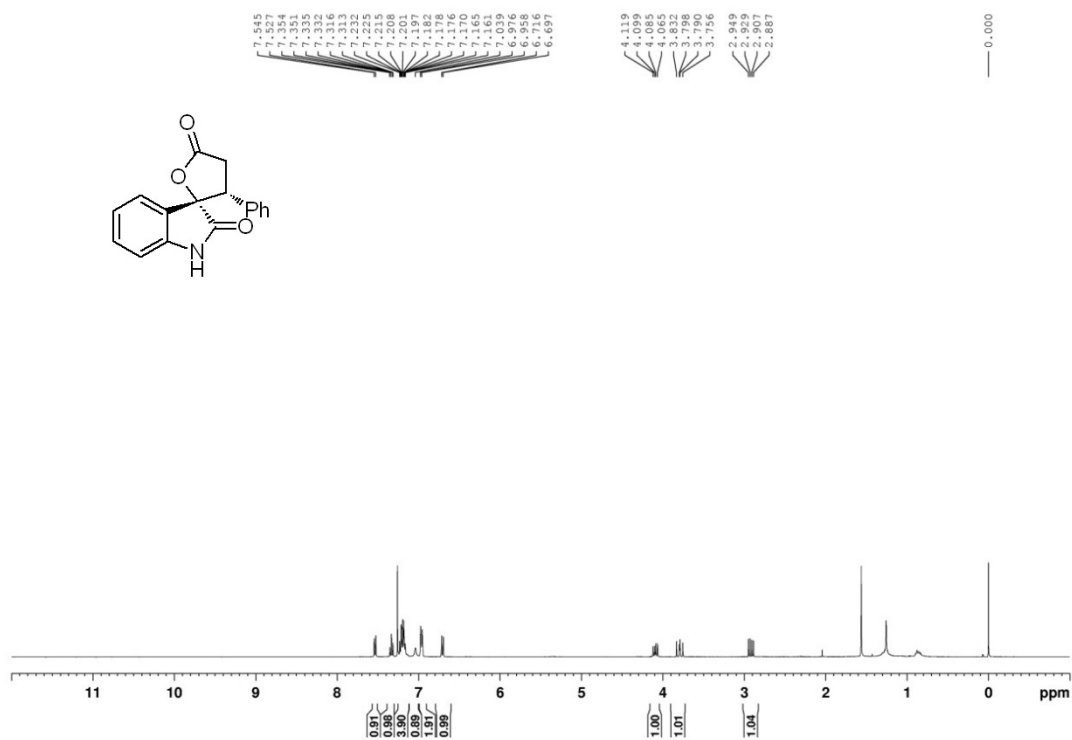

$^{13}\text{C}$  NMR spectrum of compound **3i** ( $\text{CDCl}_3$ , 100 MHz)

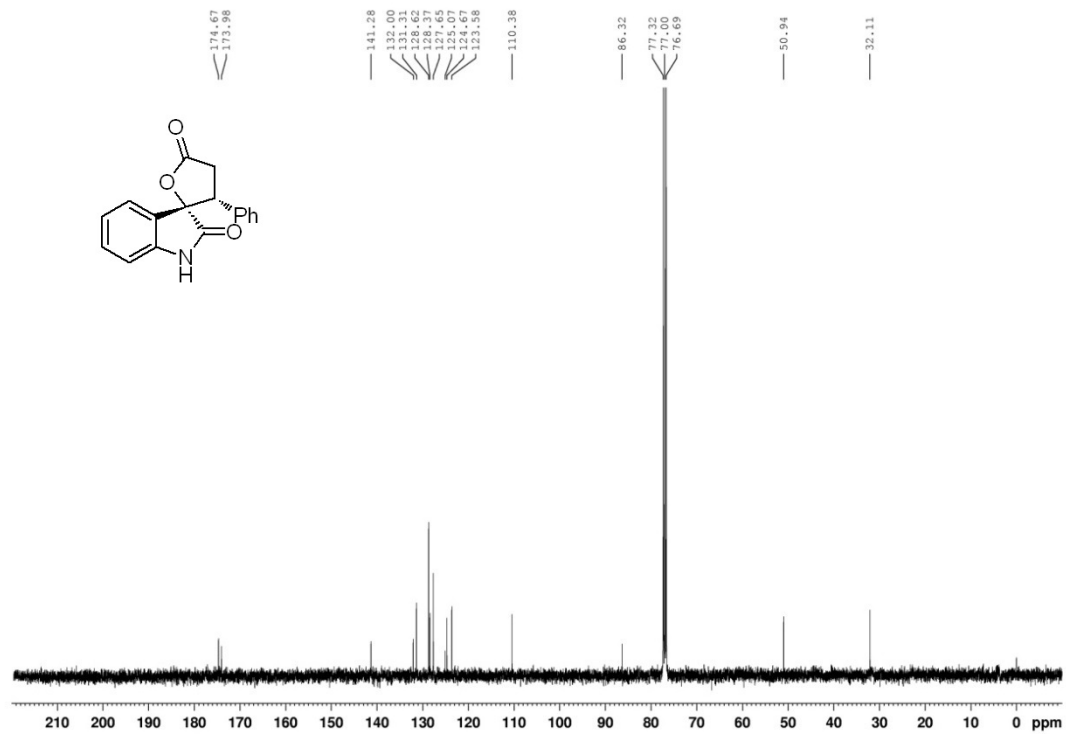

$^1\text{H}$  NMR spectrum of compound **3j** ( $\text{CDCl}_3$ , 400 MHz)

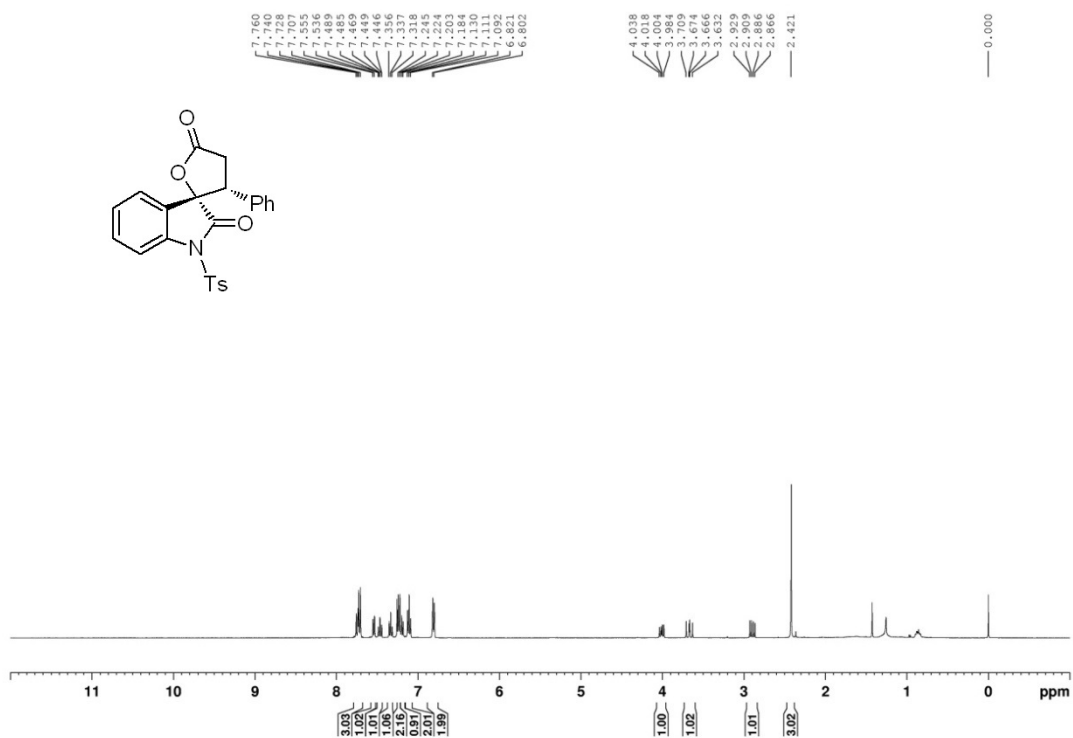

$^{13}\text{C}$  NMR spectrum of compound **3j** ( $\text{CDCl}_3$ , 100 MHz)

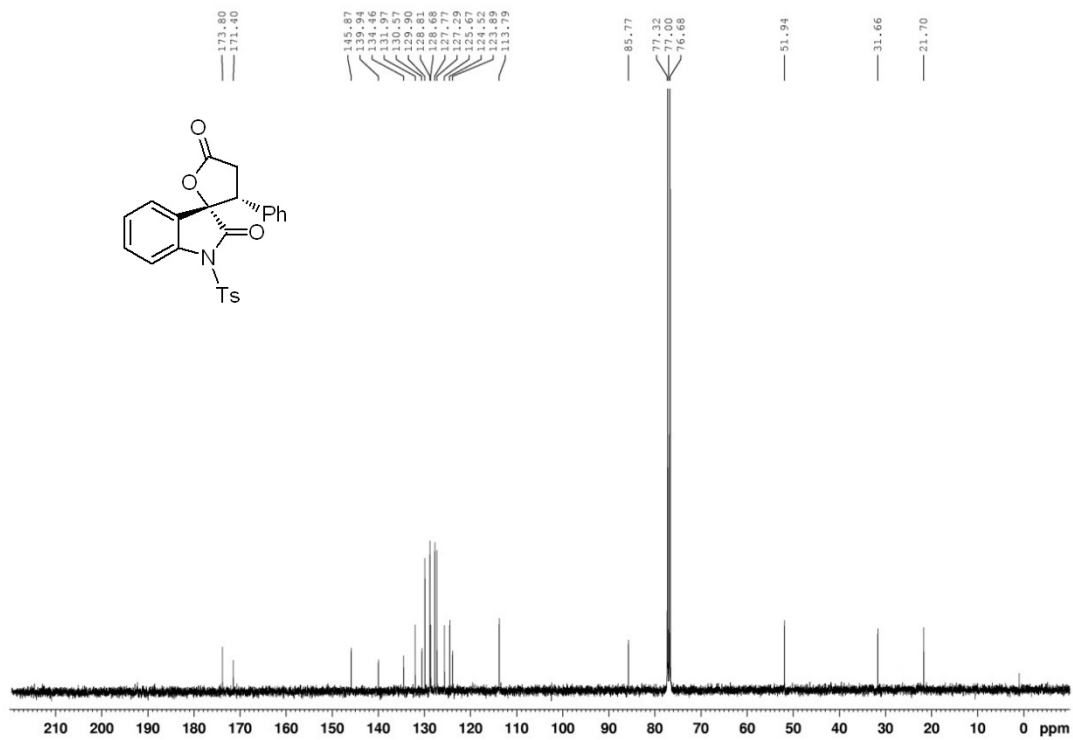

$^1\text{H}$  NMR spectrum of compound **3k** ( $\text{CDCl}_3$ , 400 MHz)

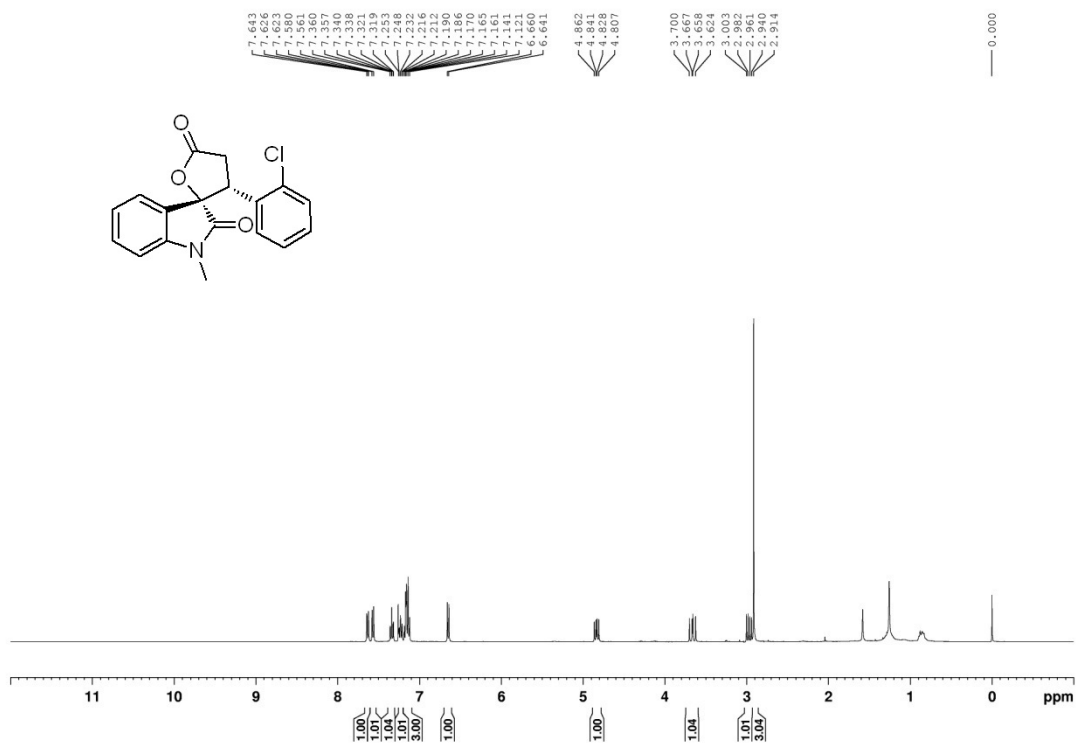

$^{13}\text{C}$  NMR spectrum of compound **3k** ( $\text{CDCl}_3$ , 100 MHz)

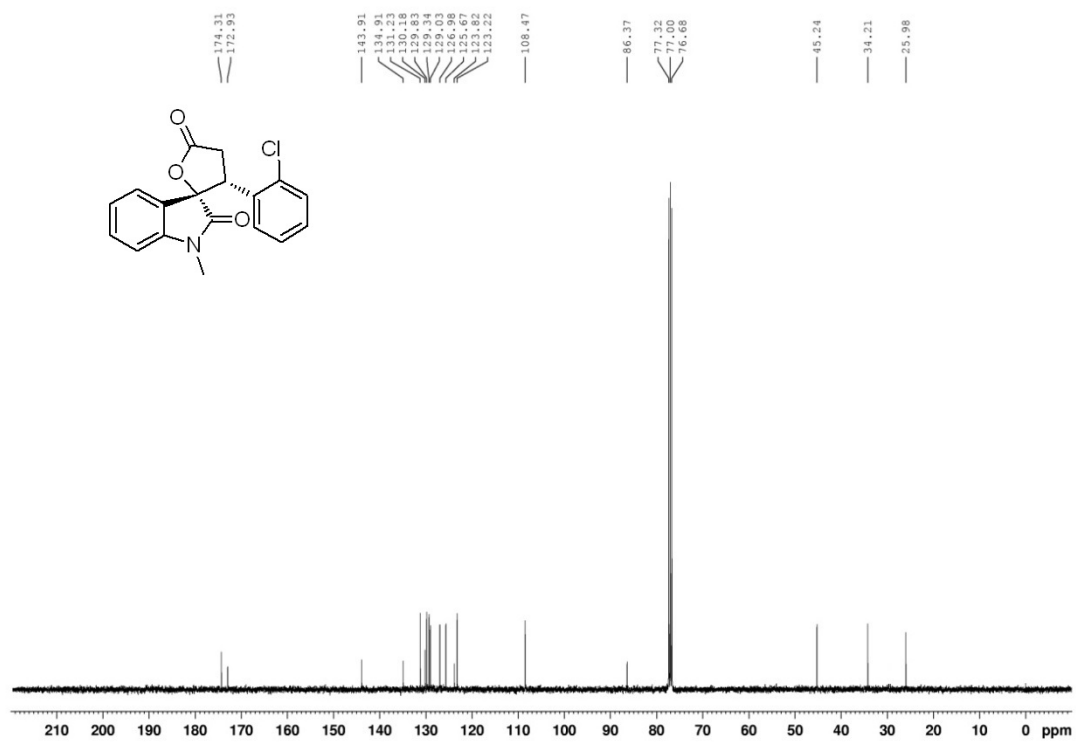



<sup>1</sup>H NMR spectrum of compound **31** (CDCl<sub>3</sub>, 400 MHz)

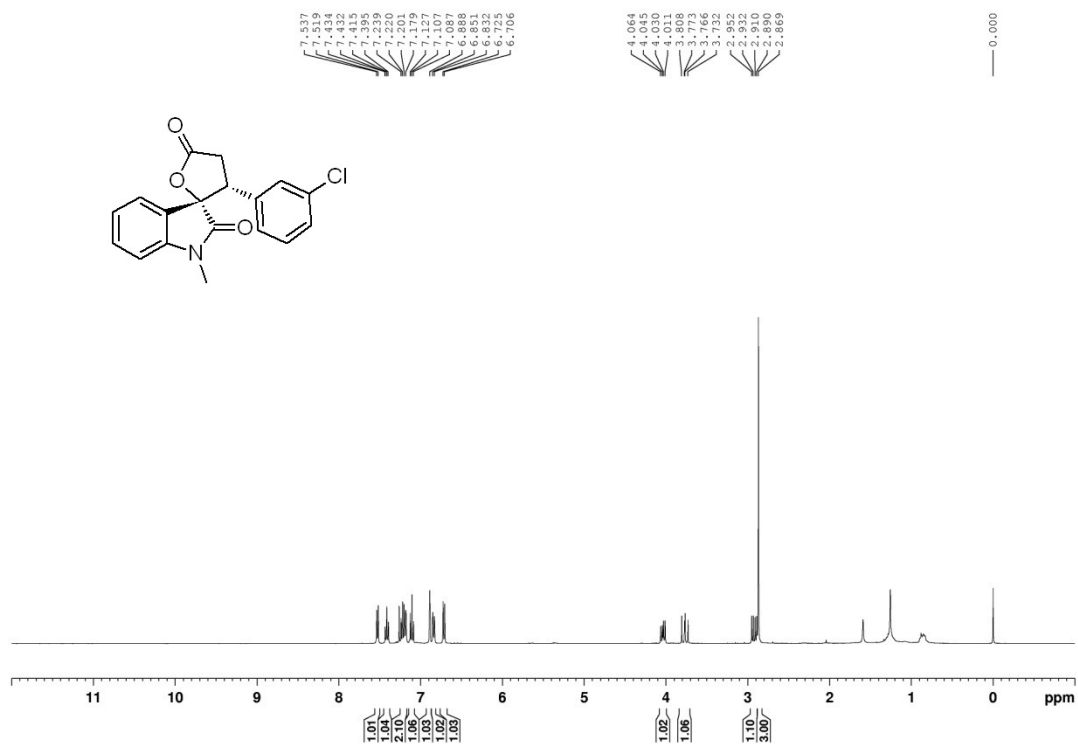

<sup>13</sup>C NMR spectrum of compound **31** (CDCl<sub>3</sub>, 100 MHz)

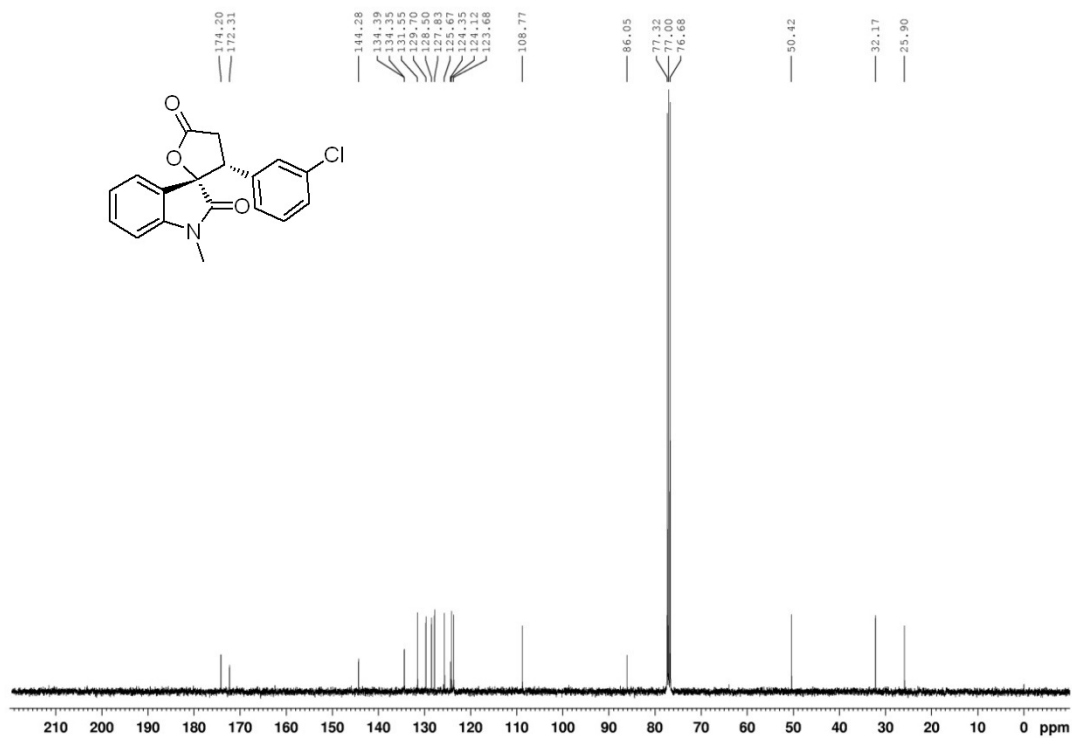

$^1\text{H}$  NMR spectrum of compound **3m** ( $\text{CDCl}_3$ , 400 MHz)

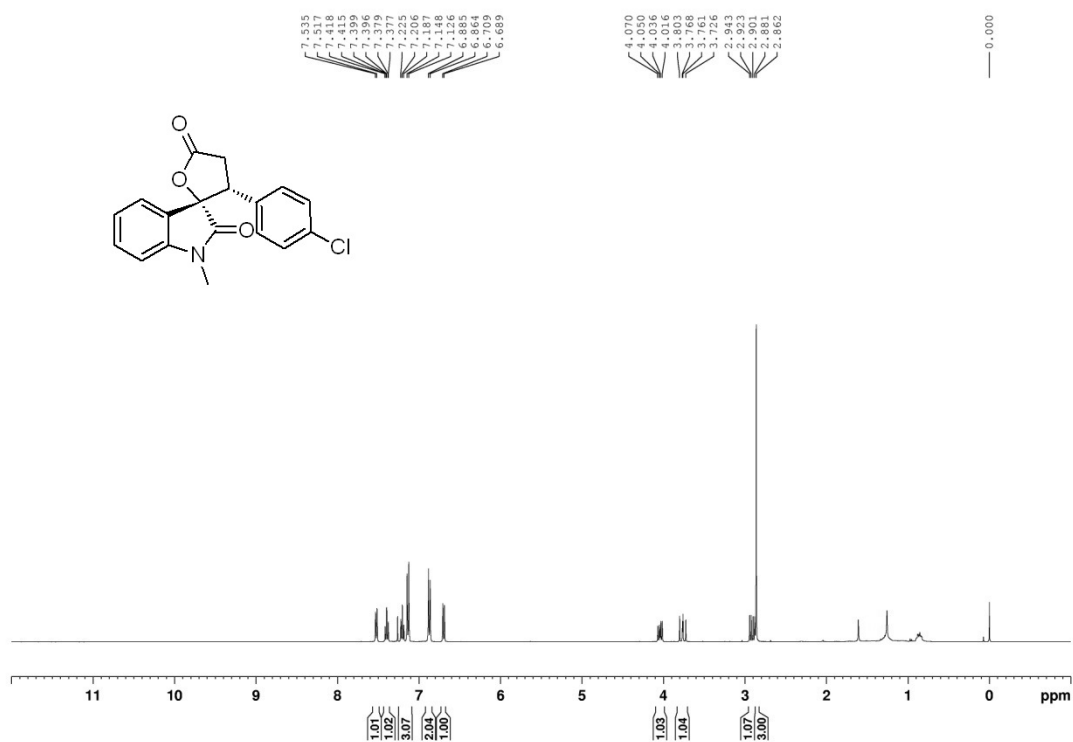

$^{13}\text{C}$  NMR spectrum of compound **3m** ( $\text{CDCl}_3$ , 100 MHz)

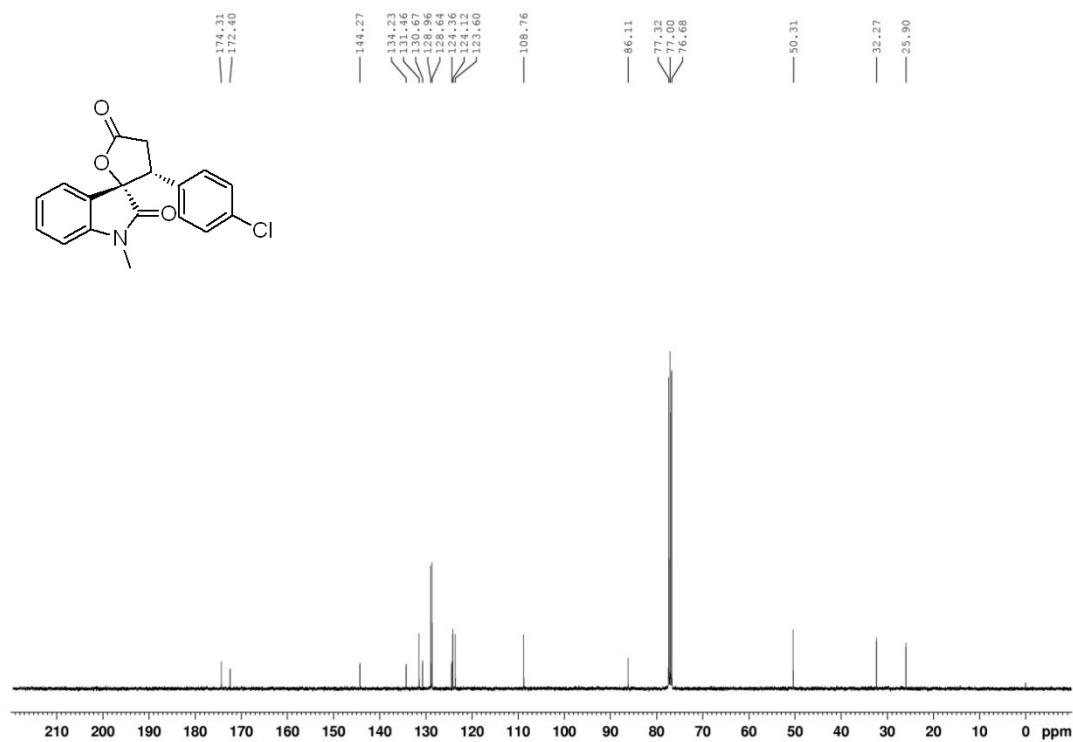

$^1\text{H}$  NMR spectrum of compound **3n** ( $\text{CDCl}_3$ , 400 MHz)

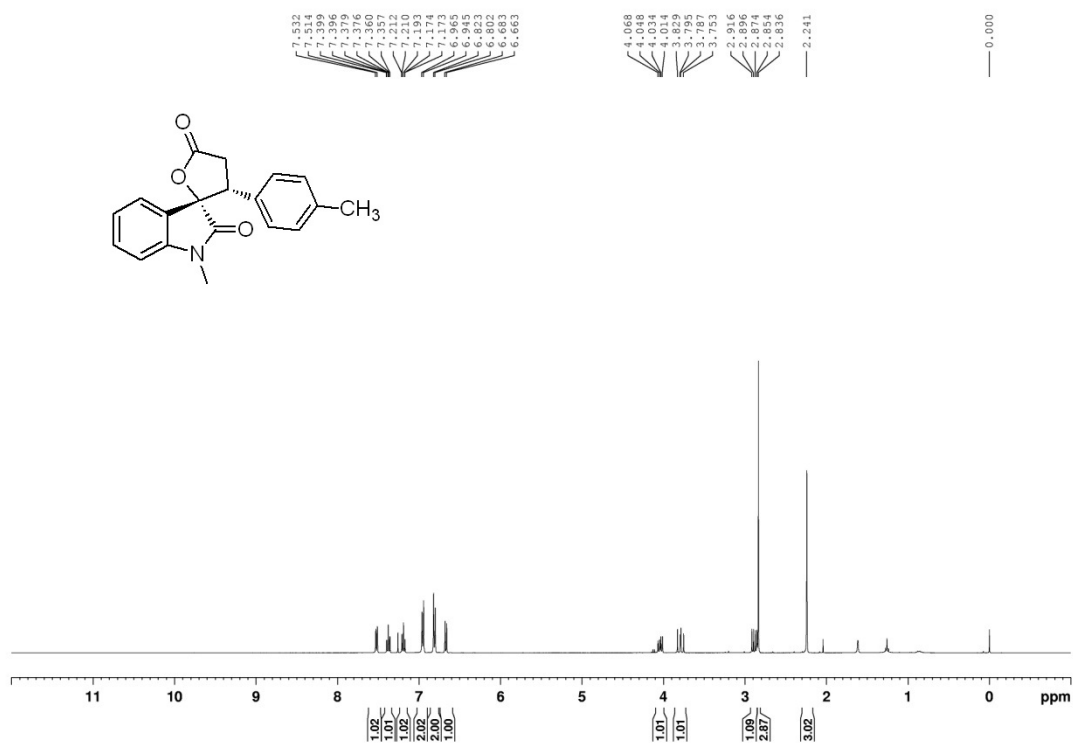

$^{13}\text{C}$  NMR spectrum of compound **3n** ( $\text{CDCl}_3$ , 100 MHz)

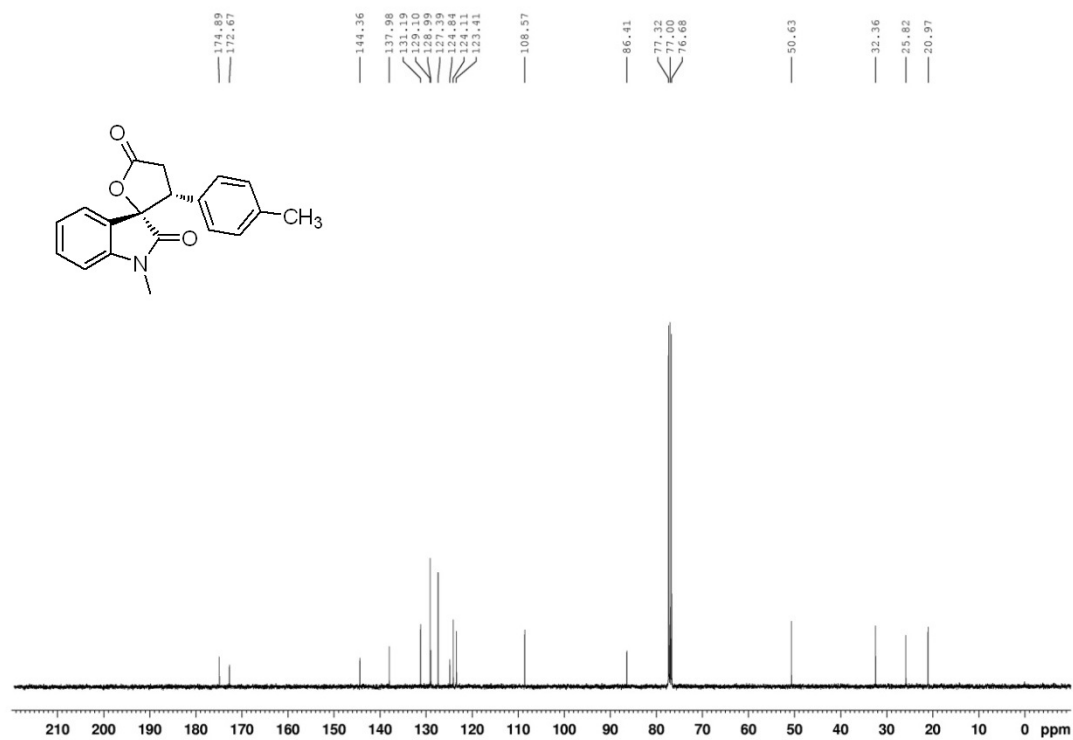

$^1\text{H}$  NMR spectrum of compound **3o** ( $\text{CDCl}_3$ , 400 MHz)

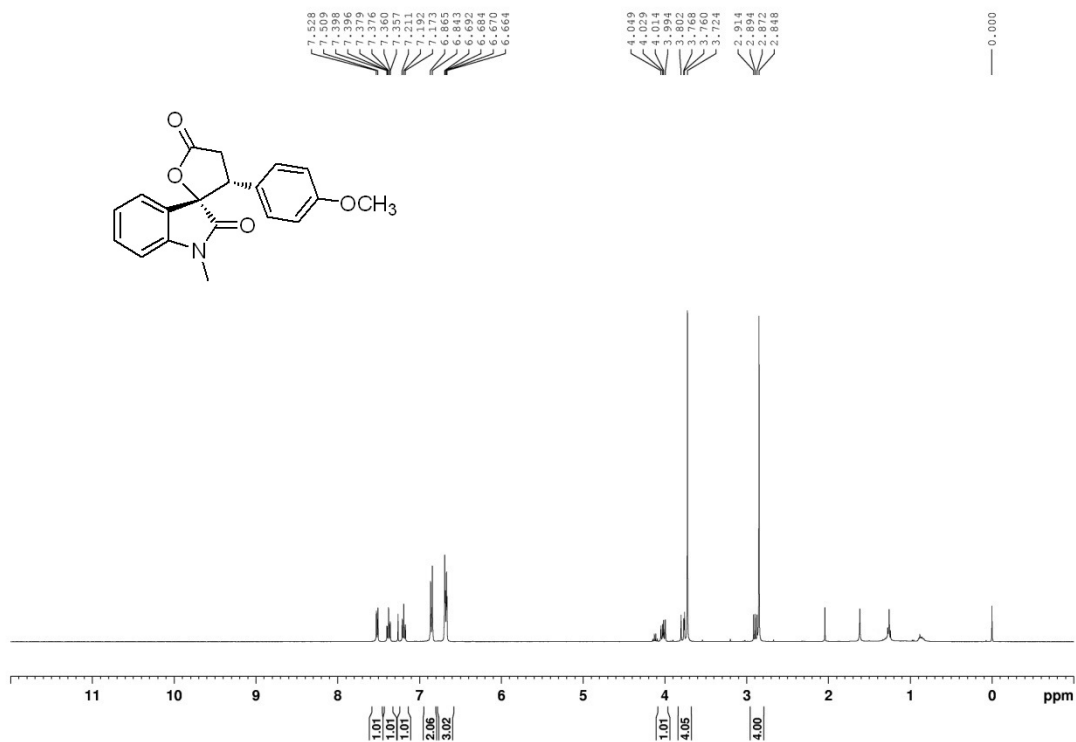

$^{13}\text{C}$  NMR spectrum of compound **3o** ( $\text{CDCl}_3$ , 100 MHz)

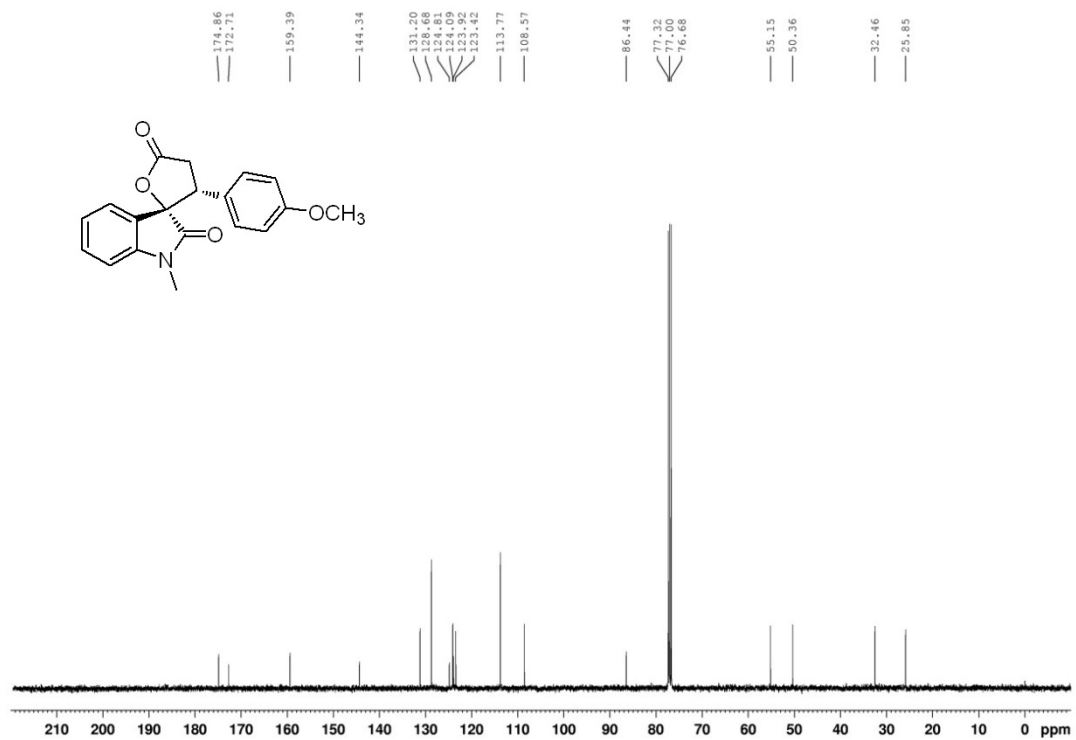

### $^1\text{H}$ NMR spectrum of compound **3p**

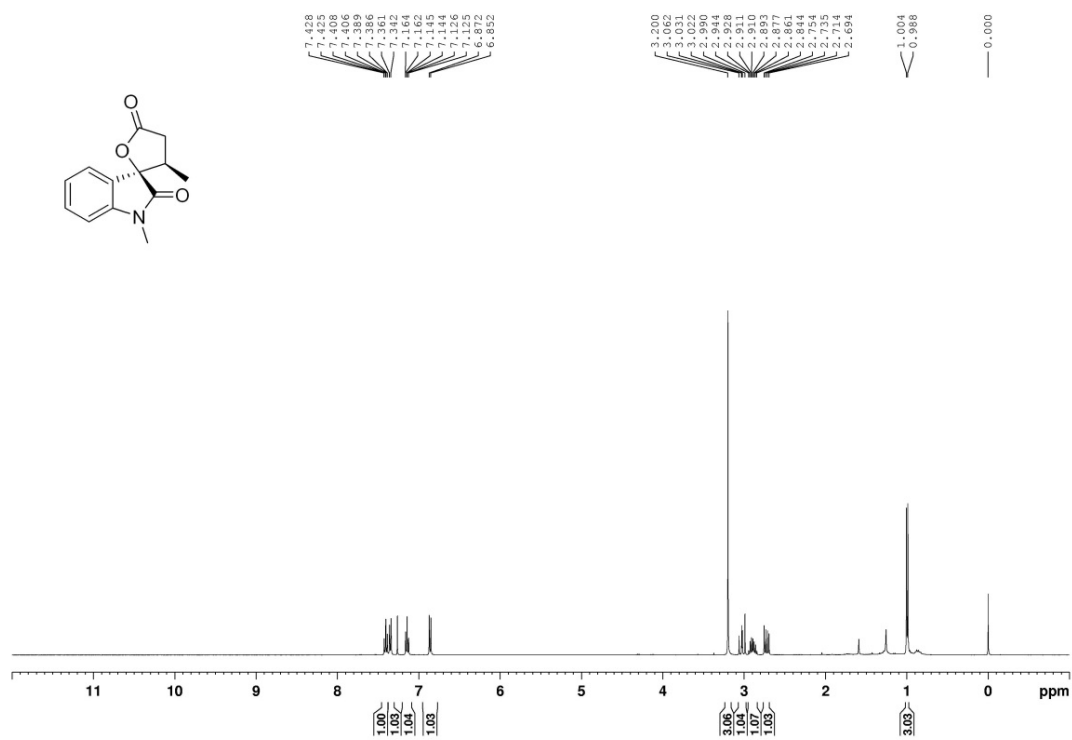

### $^{13}\text{C}$ NMR spectrum of compound **3p**

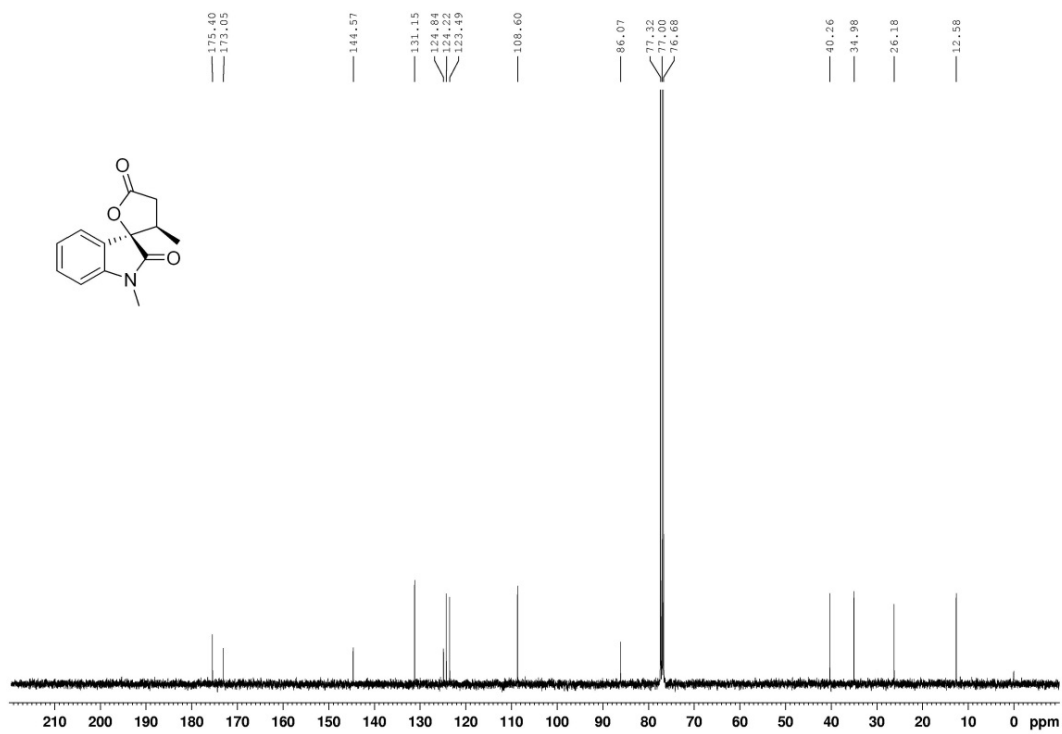

$^1\text{H}$  NMR spectrum of compound **5a** ( $\text{CDCl}_3$ , 400 MHz)

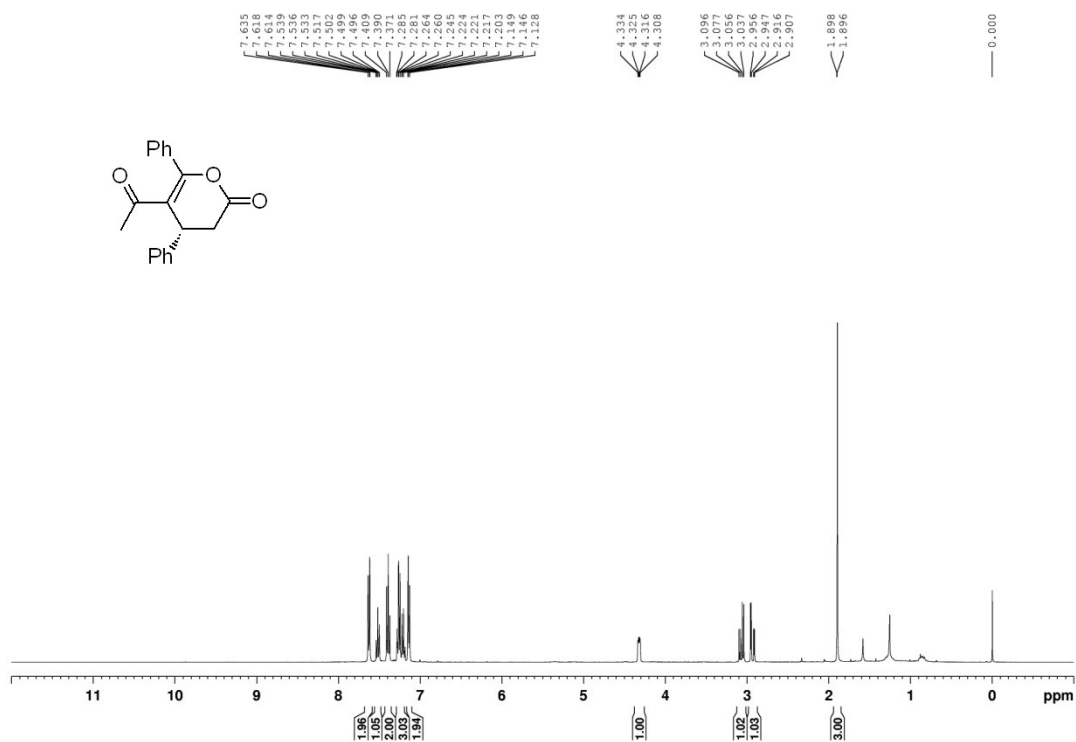

$^{13}\text{C}$  NMR spectrum of compound **5a** ( $\text{CDCl}_3$ , 100 MHz)

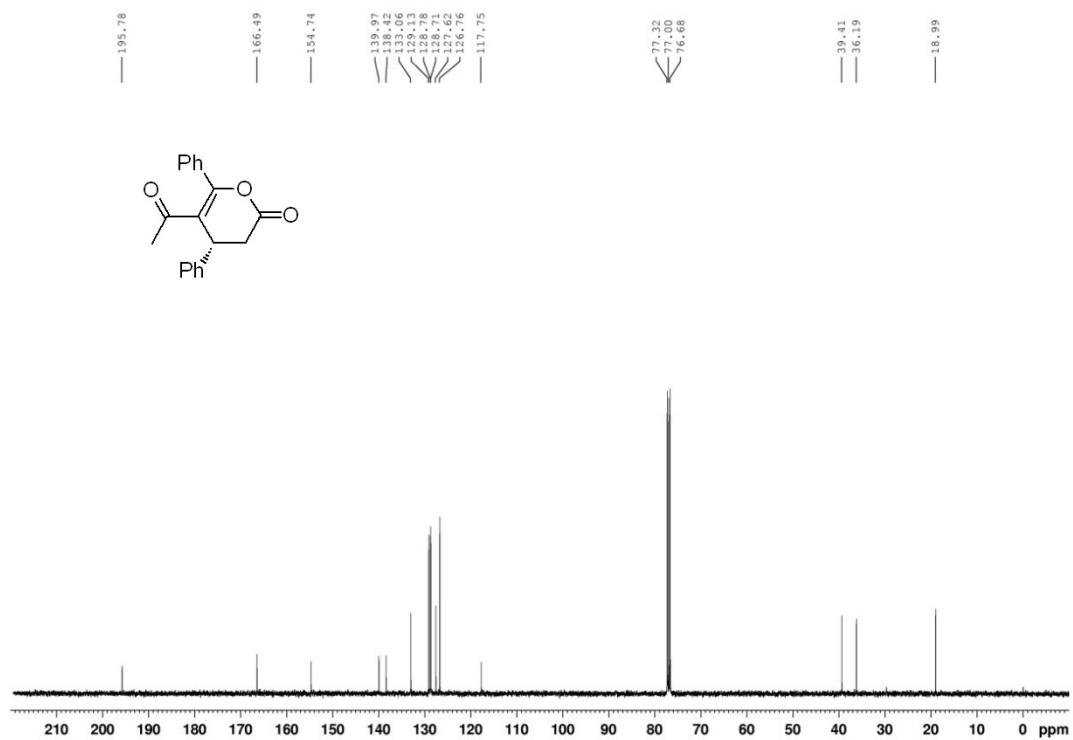

$^1\text{H}$  NMR spectrum of compound **5b** ( $\text{CDCl}_3$ , 400 MHz)

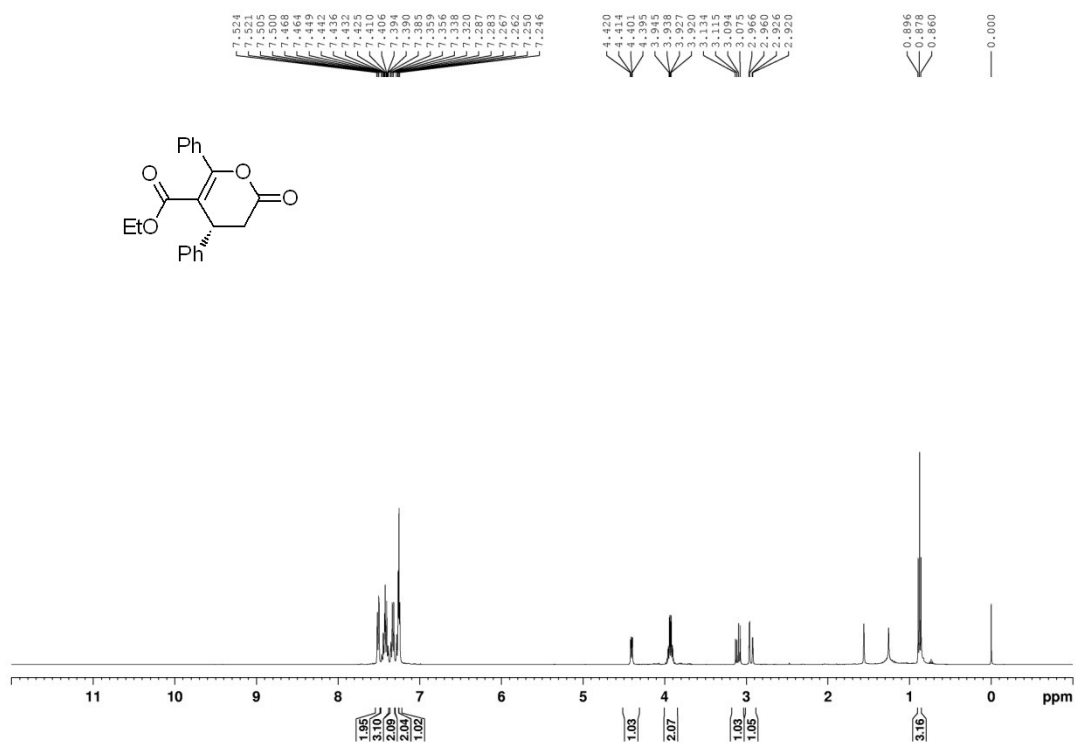

$^{13}\text{C}$  NMR spectrum of compound **5b** ( $\text{CDCl}_3$ , 100 MHz)

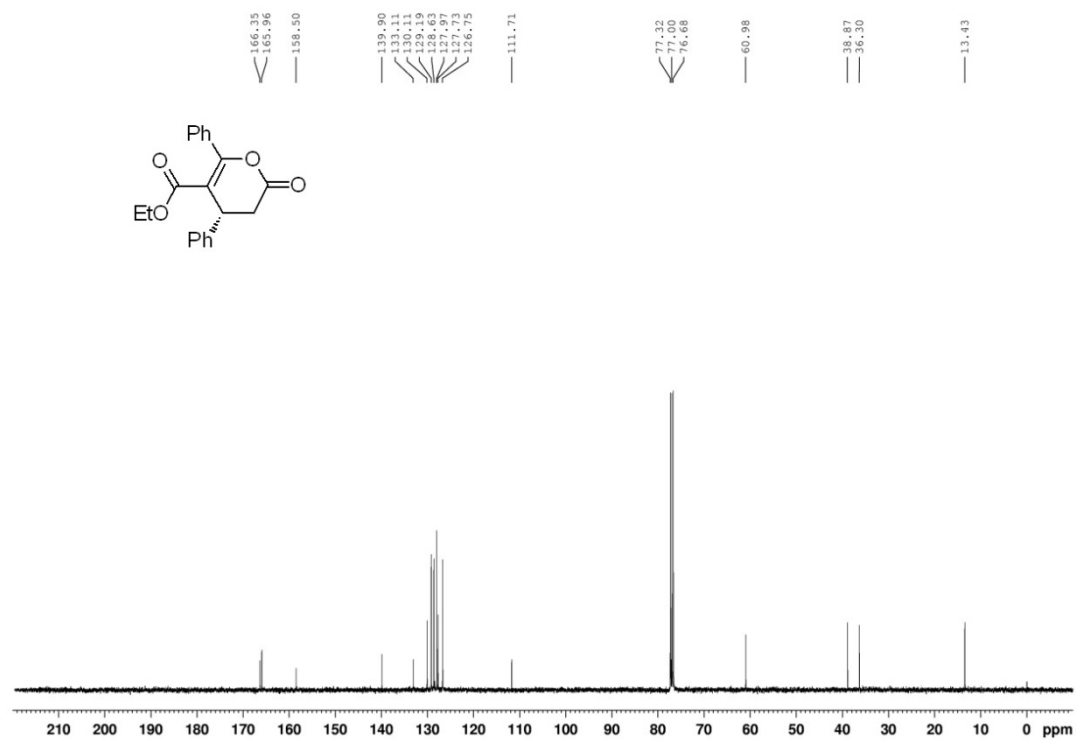

$^1\text{H}$  NMR spectrum of compound **5c** ( $\text{CDCl}_3$ , 400 MHz)

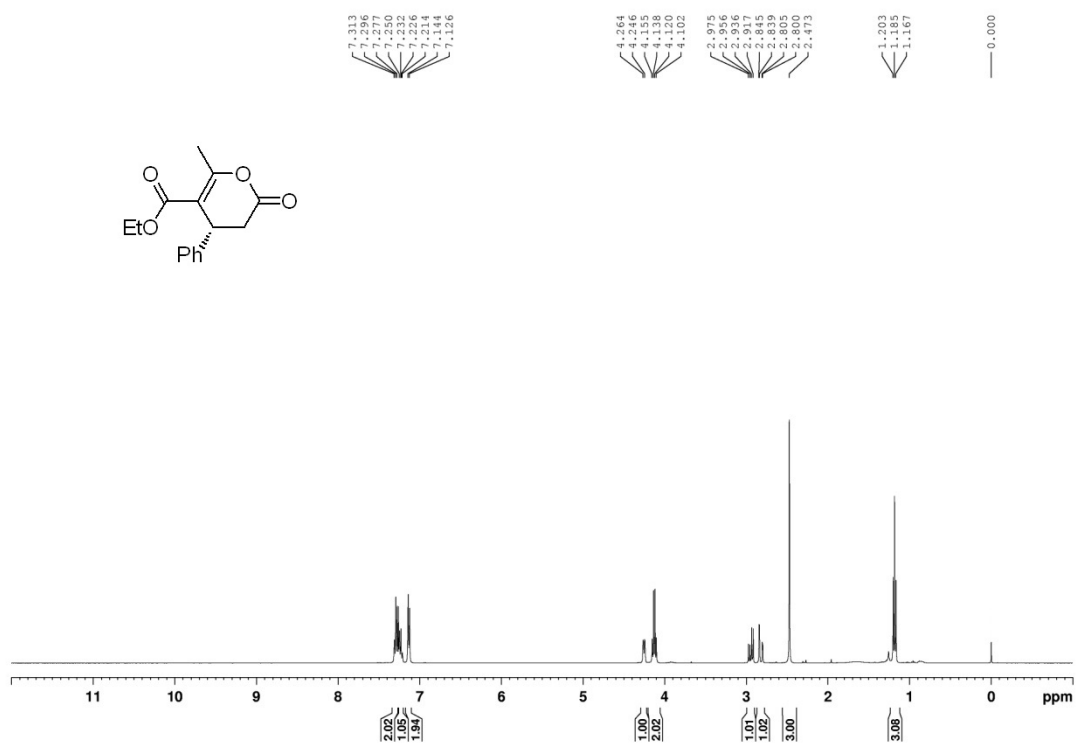

$^{13}\text{C}$  NMR spectrum of compound **5c** ( $\text{CDCl}_3$ , 100 MHz)

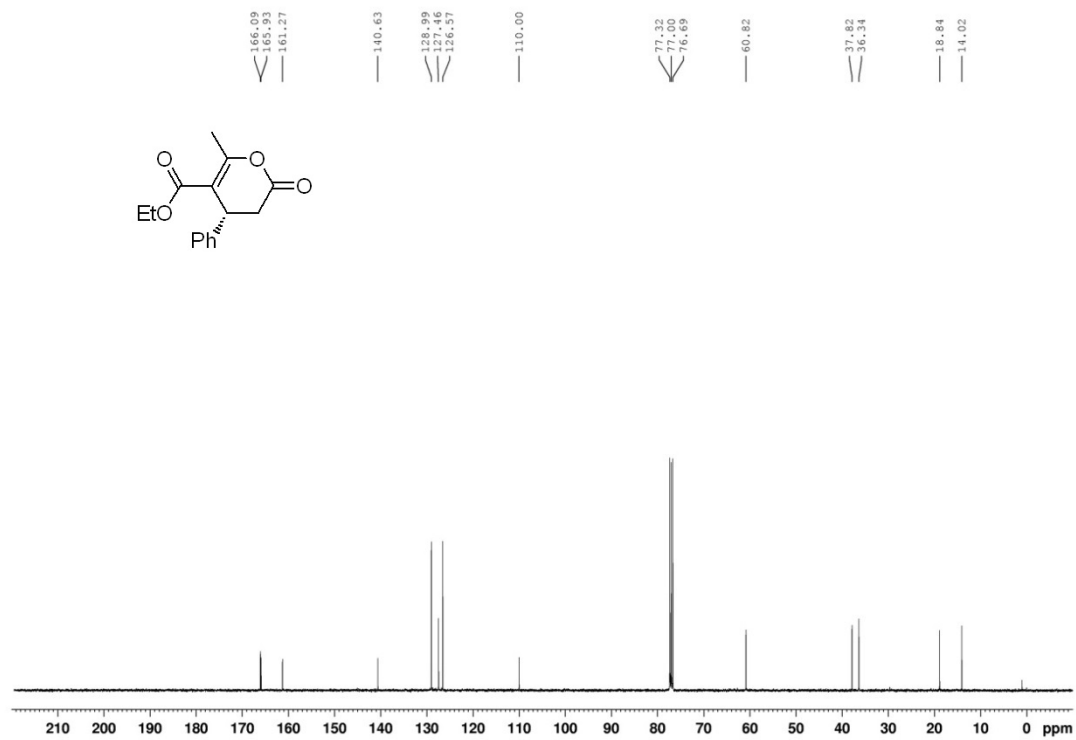



$^1\text{H}$  NMR spectrum of compound **5d** ( $\text{CDCl}_3$ , 400 MHz)

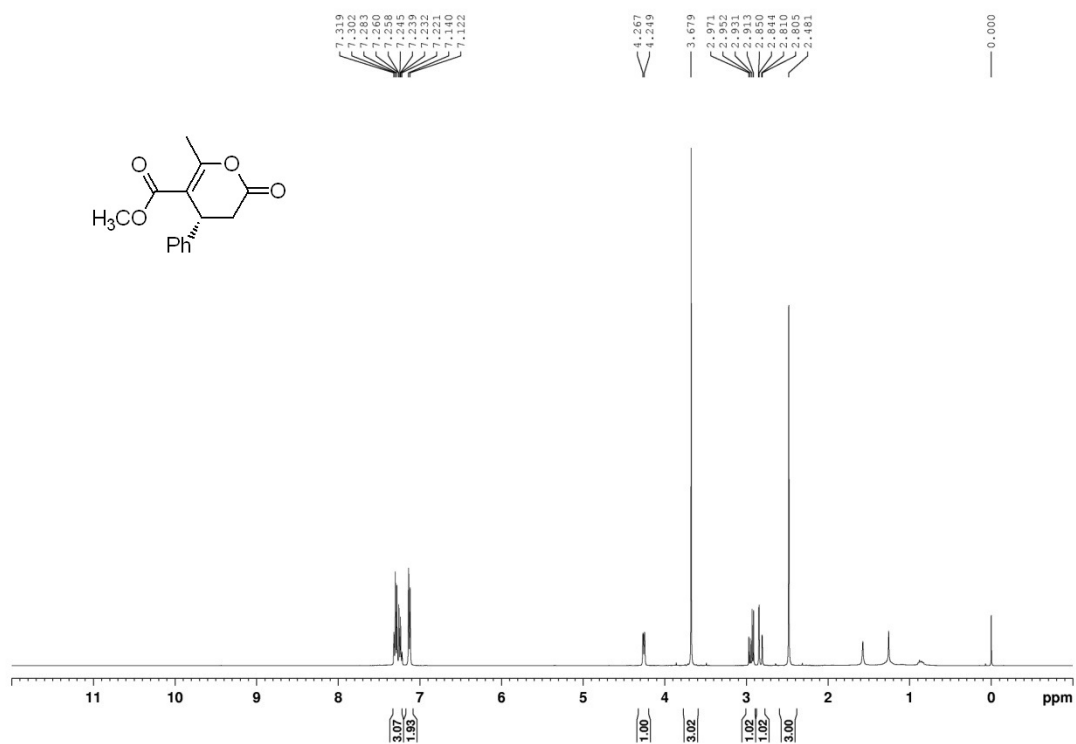

$^{13}\text{C}$  NMR spectrum of compound **5d** ( $\text{CDCl}_3$ , 100 MHz)

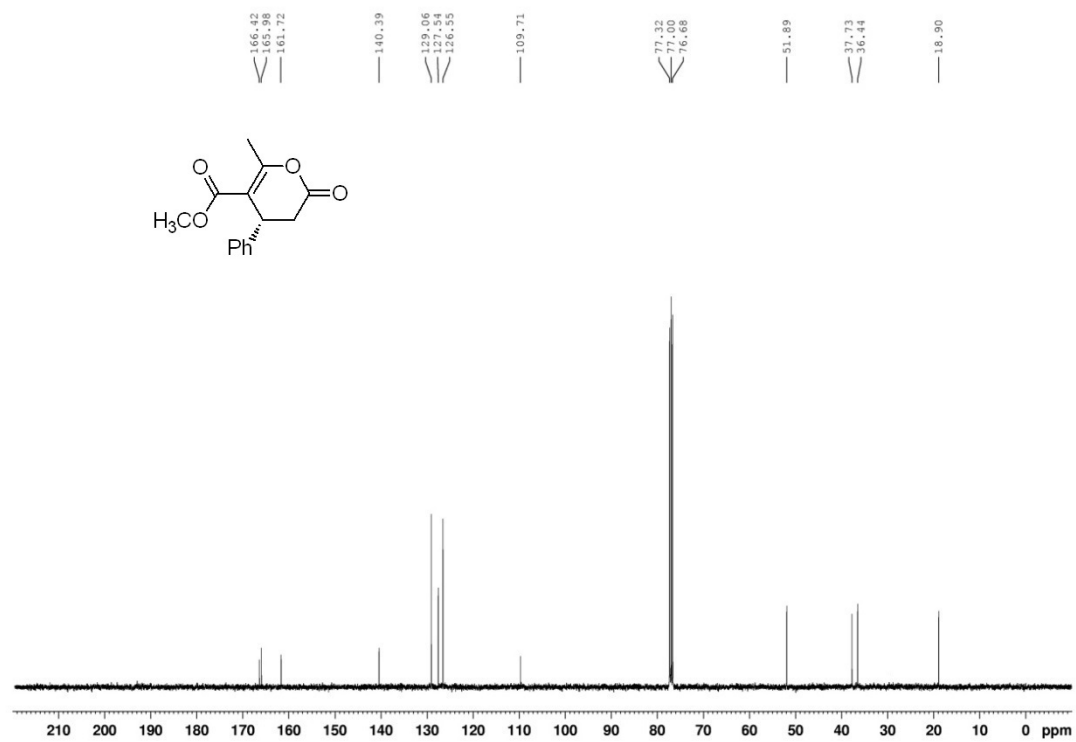

$^1\text{H}$  NMR spectrum of compound **5e** ( $\text{CDCl}_3$ , 400 MHz)

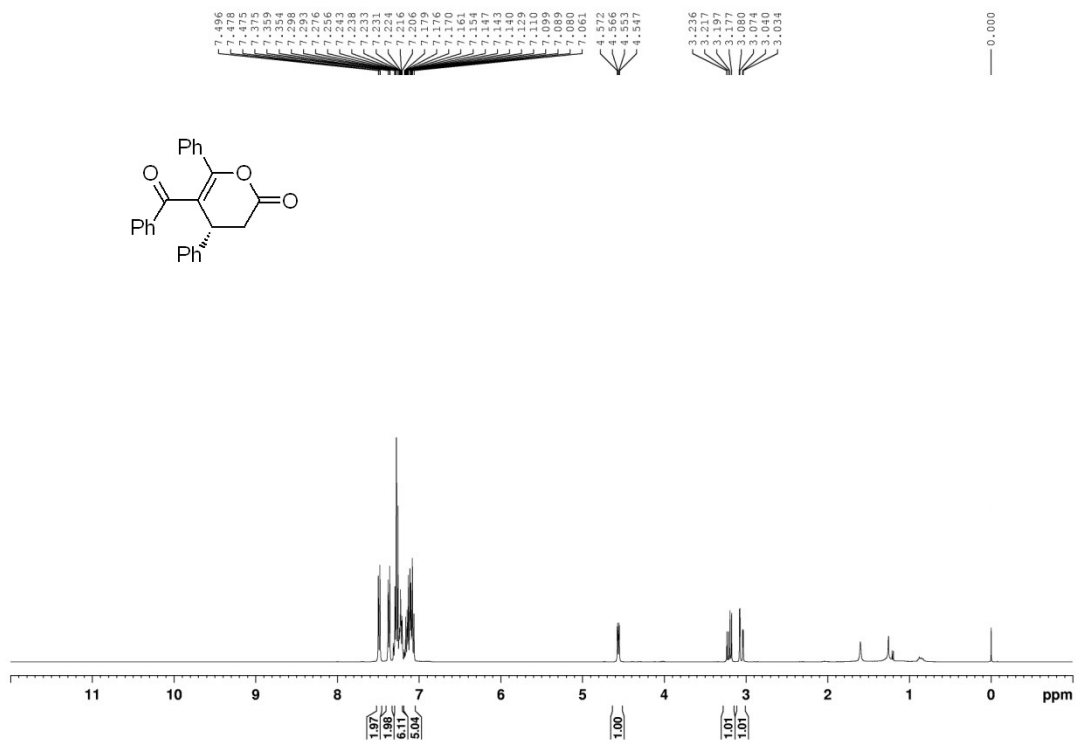

$^{13}\text{C}$  NMR spectrum of compound **5e** ( $\text{CDCl}_3$ , 100 MHz)

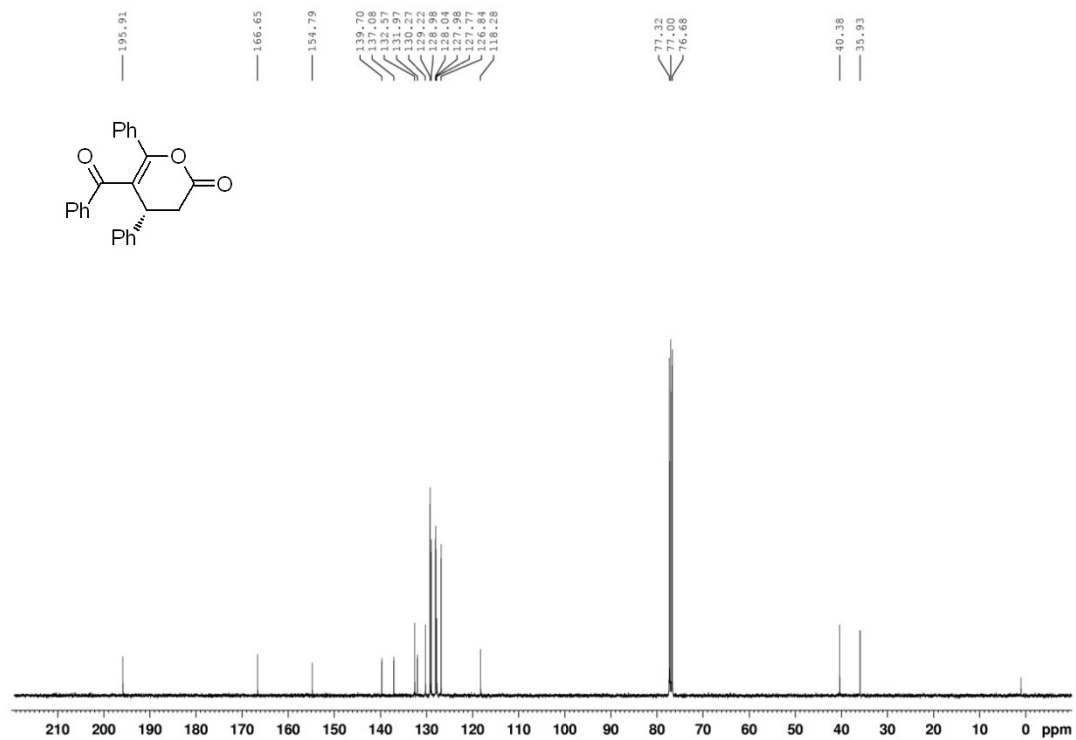

$^1\text{H}$  NMR spectrum of compound **5f** ( $\text{CDCl}_3$ , 400 MHz)

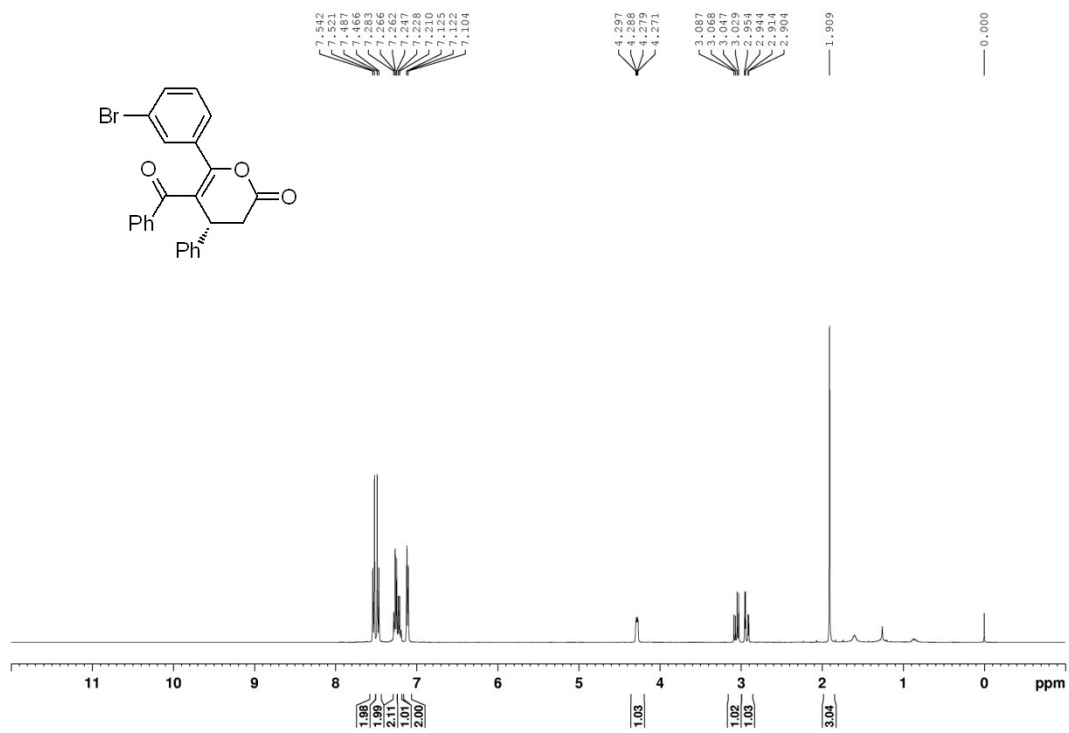

$^{13}\text{C}$  NMR spectrum of compound **5f** ( $\text{CDCl}_3$ , 100 MHz)

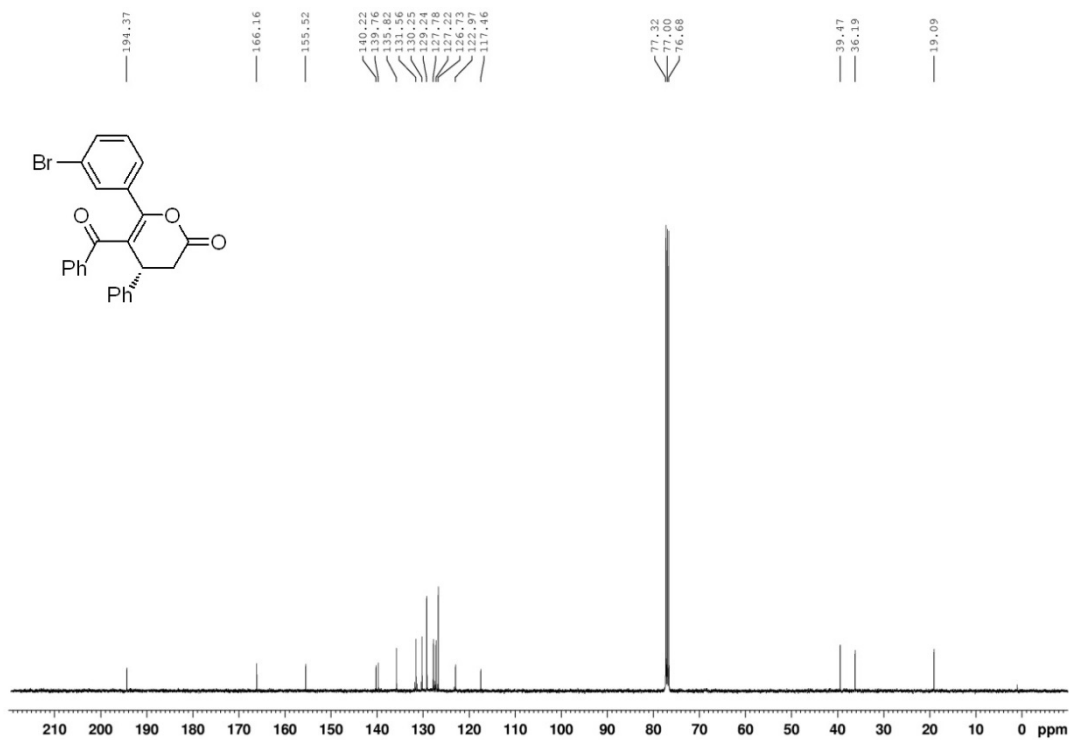

$^1\text{H}$  NMR spectrum of compound **5g** ( $\text{CDCl}_3$ , 400 MHz)

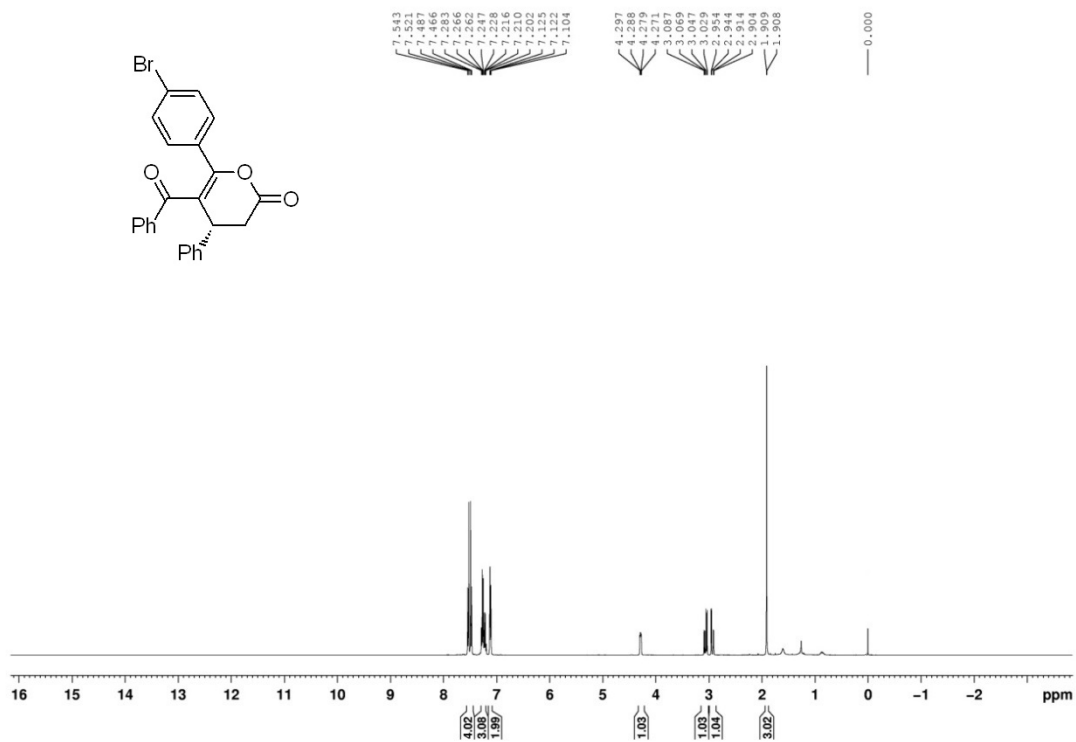

$^{13}\text{C}$  NMR spectrum of compound **5g** ( $\text{CDCl}_3$ , 100 MHz)

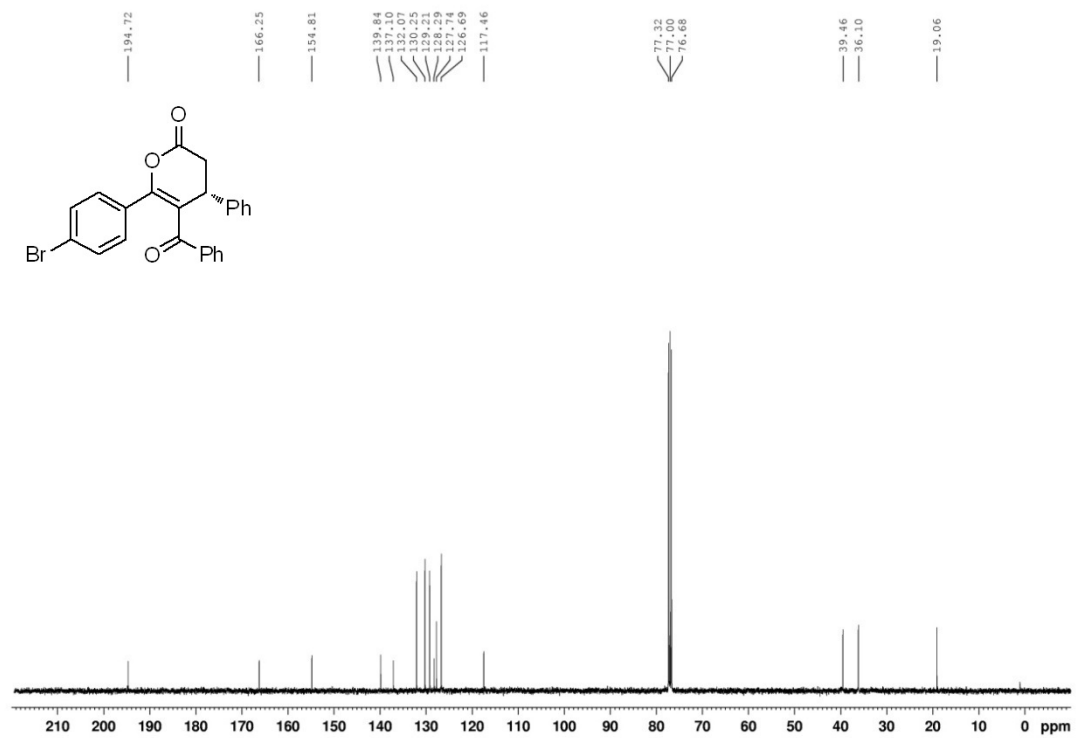

$^1\text{H}$  NMR spectrum of compound **5h** ( $\text{CDCl}_3$ , 400 MHz)

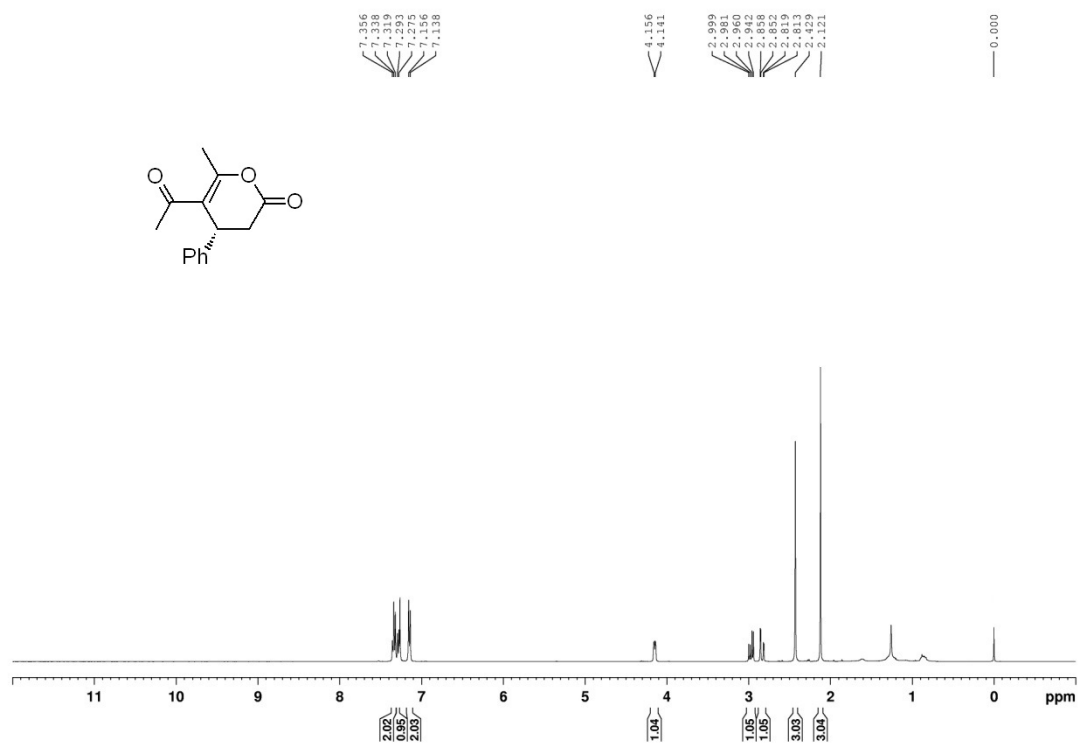

$^{13}\text{C}$  NMR spectrum of compound **5h** ( $\text{CDCl}_3$ , 100 MHz)

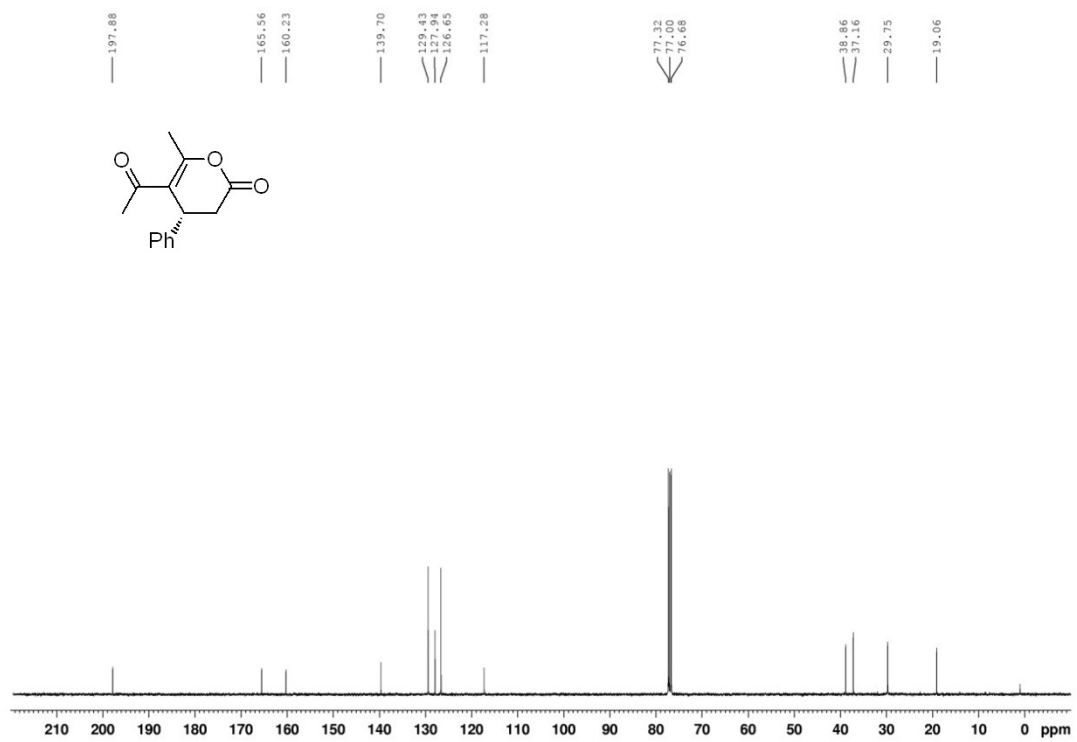

$^1\text{H}$  NMR spectrum of compound **5i** ( $\text{CDCl}_3$ , 400 MHz)

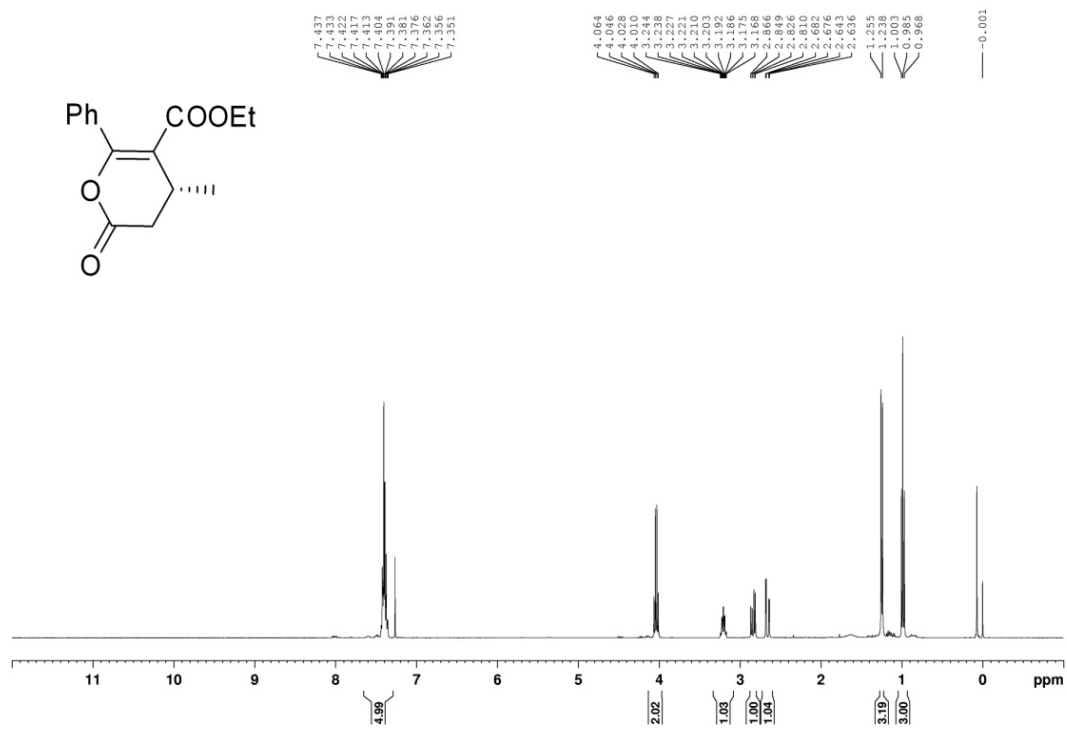

$^{13}\text{C}$  NMR spectrum of compound **5i** ( $\text{CDCl}_3$ , 100 MHz)

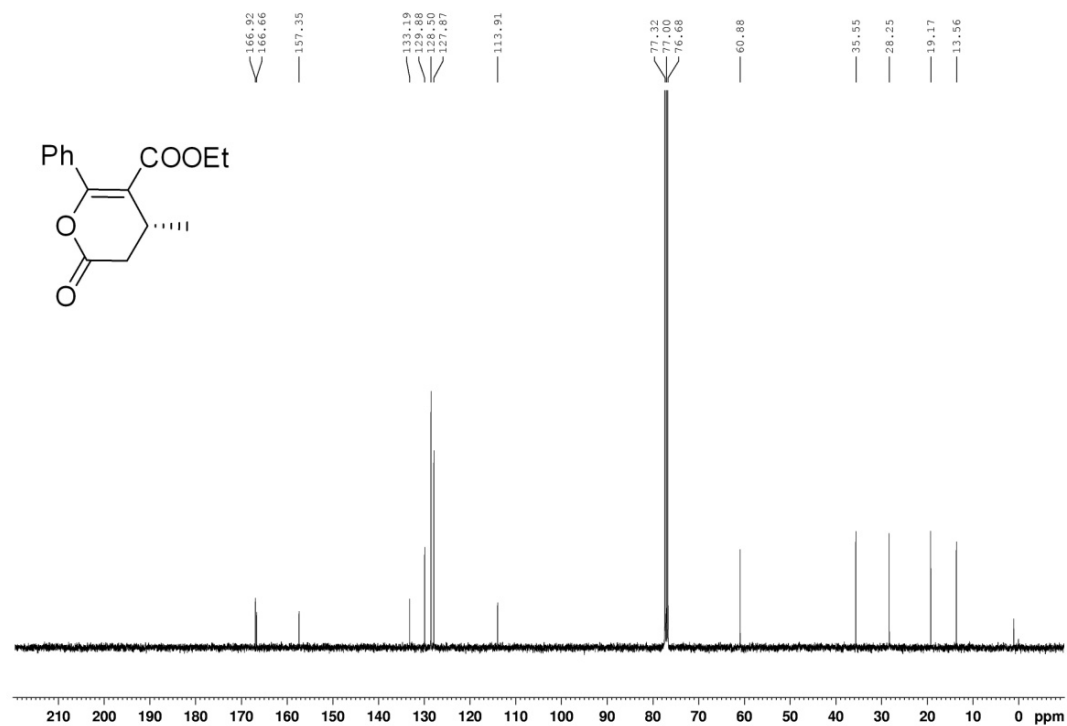

$^1\text{H}$  NMR spectrum of compound **7a** ( $\text{CDCl}_3$ , 400 MHz)

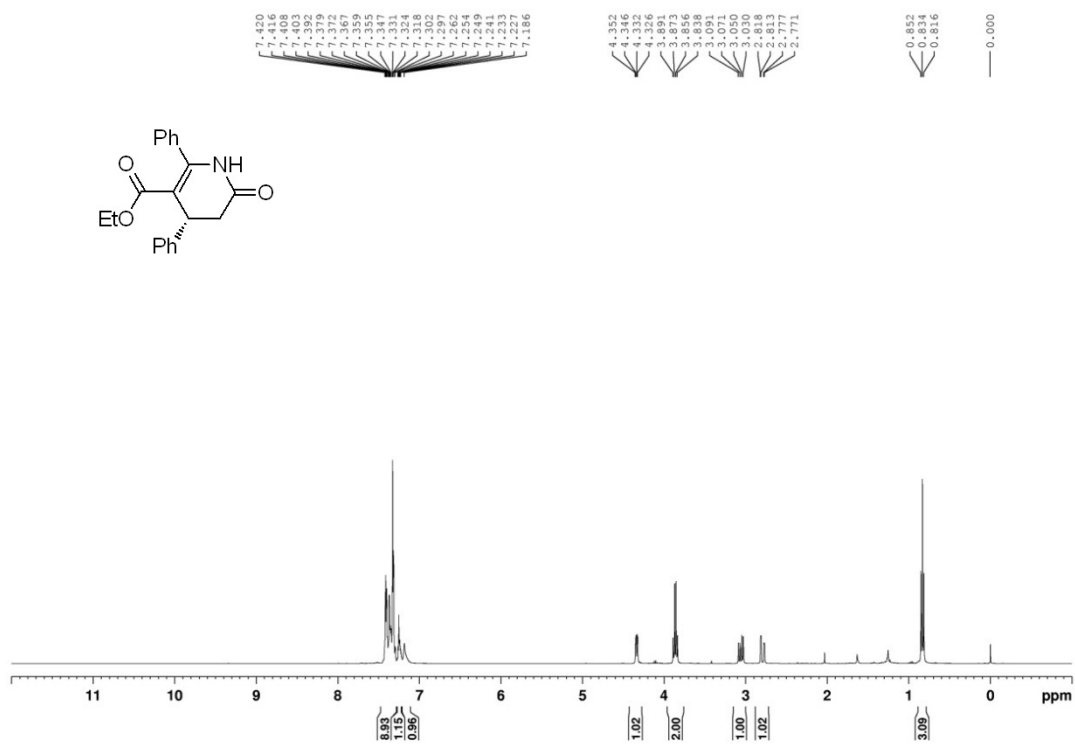

$^{13}\text{C}$  NMR spectrum of compound **7a** ( $\text{CDCl}_3$ , 100 MHz)

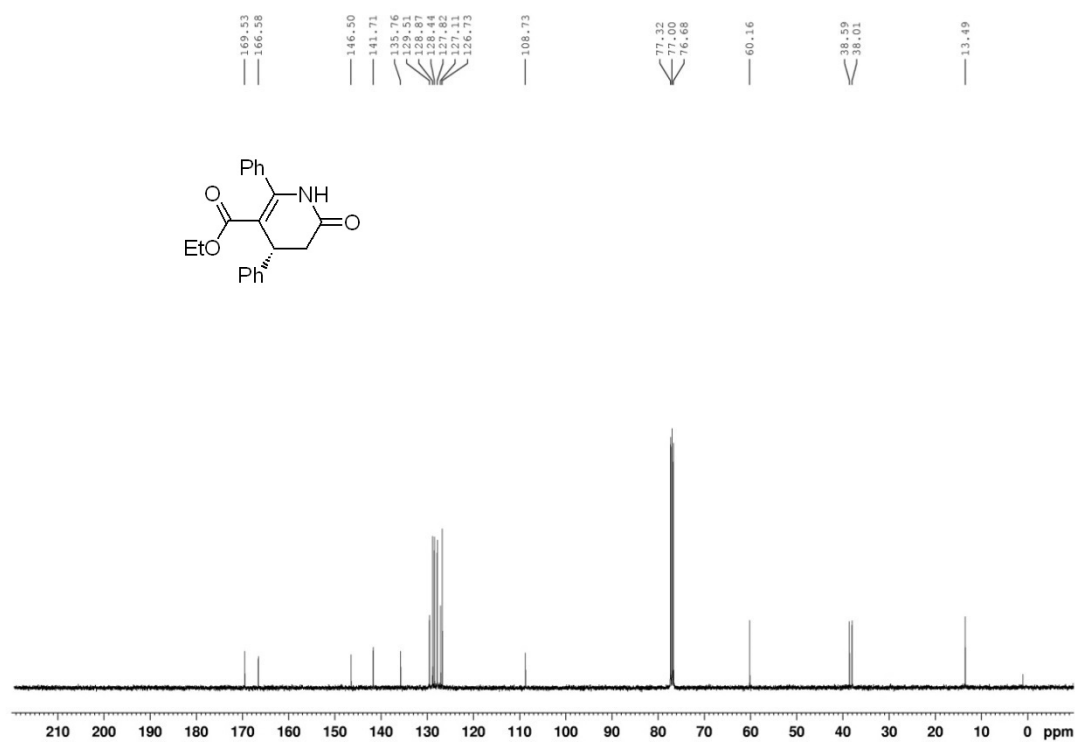

$^1\text{H}$  NMR spectrum of compound **7b** ( $\text{CDCl}_3$ , 400 MHz)

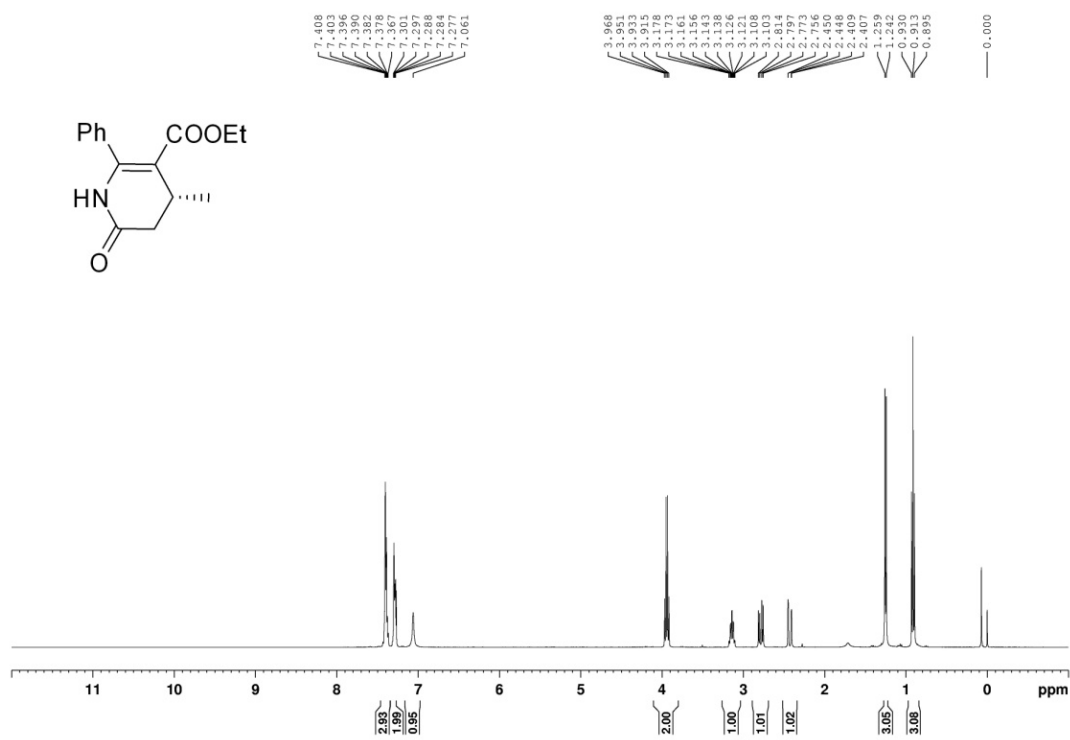

$^{13}\text{C}$  NMR spectrum of compound **7b** ( $\text{CDCl}_3$ , 100 MHz)

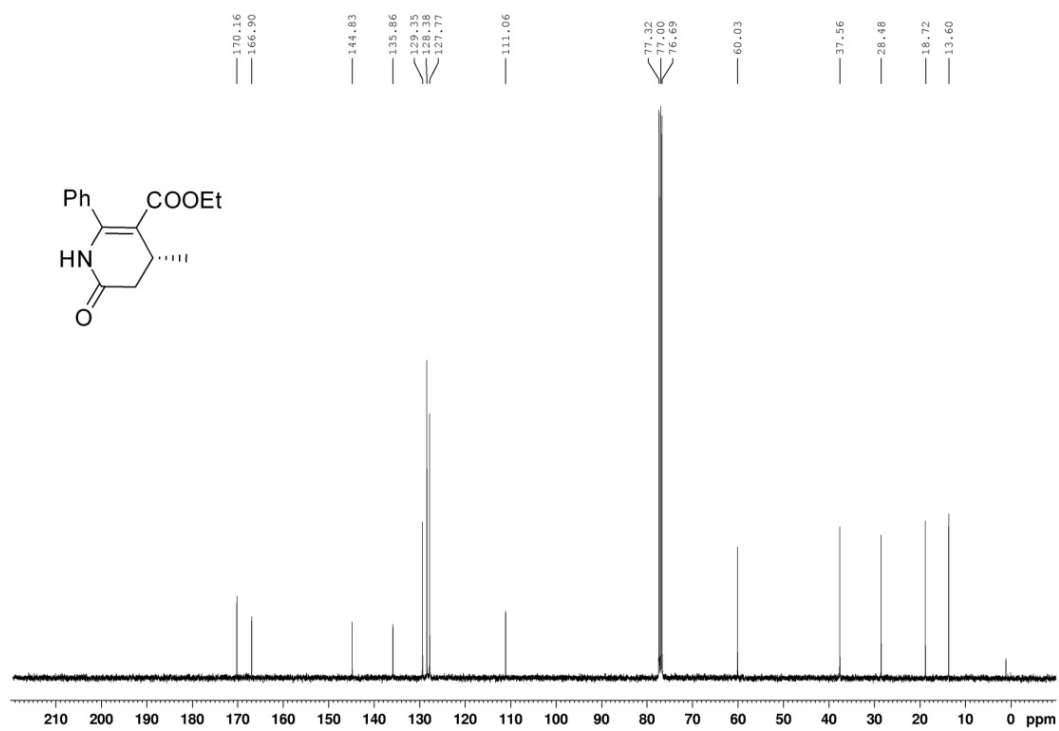



## 7. HPLC spectra for compounds 3a–3f, 3h–3p, 5a–5i and 7a–7b

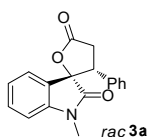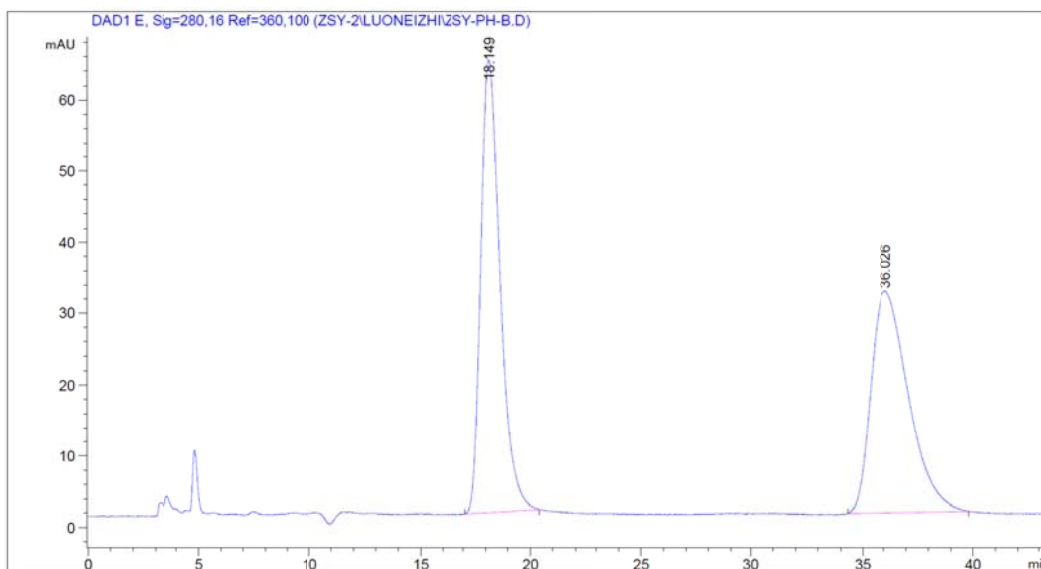

| Peak | Processed channel | Retention time (min) | Peak area (mAU*s) | Peak height (mAU) | Peak area (%) |
|------|-------------------|----------------------|-------------------|-------------------|---------------|
| 1    | PDA 280.16 nm     | 18.149               | 3813.47461        | 63.44444          | 50.64         |
| 2    | PDA 280.16 nm     | 36.026               | 3717.01733        | 31.01186          | 49.36         |

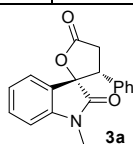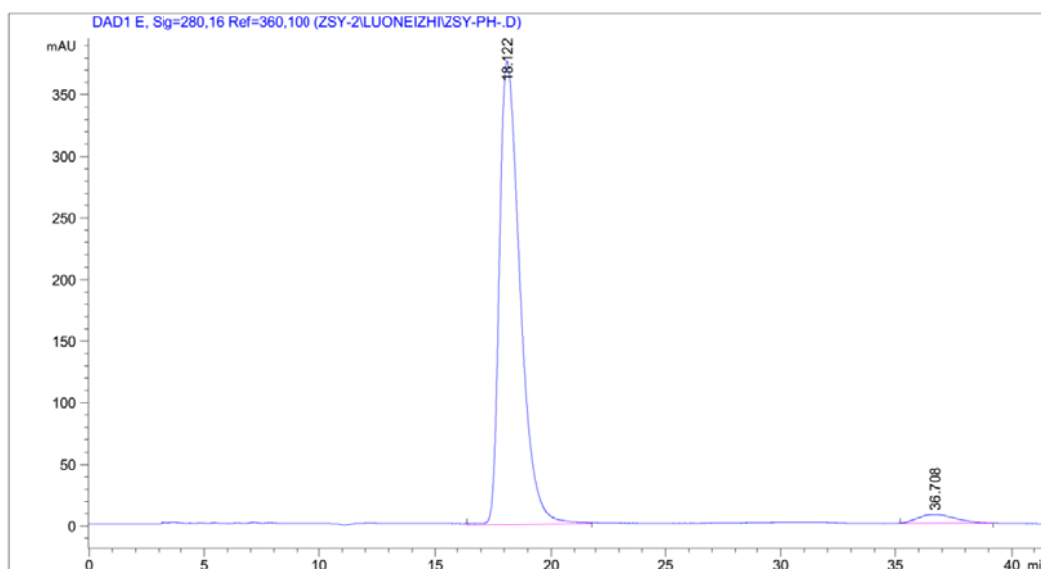

| Peak | Processed channel | Retention time (min) | Peak area (mAU*s) | Peak height (mAU) | Peak area (%) |
|------|-------------------|----------------------|-------------------|-------------------|---------------|
| 1    | PDA 280.16 nm     | 18.122               | 2.31660e4         | 376.05981         | 97.76         |
| 2    | PDA 280.16 nm     | 36.708               | 763.95637         | 7.03376           | 2.24          |

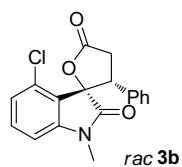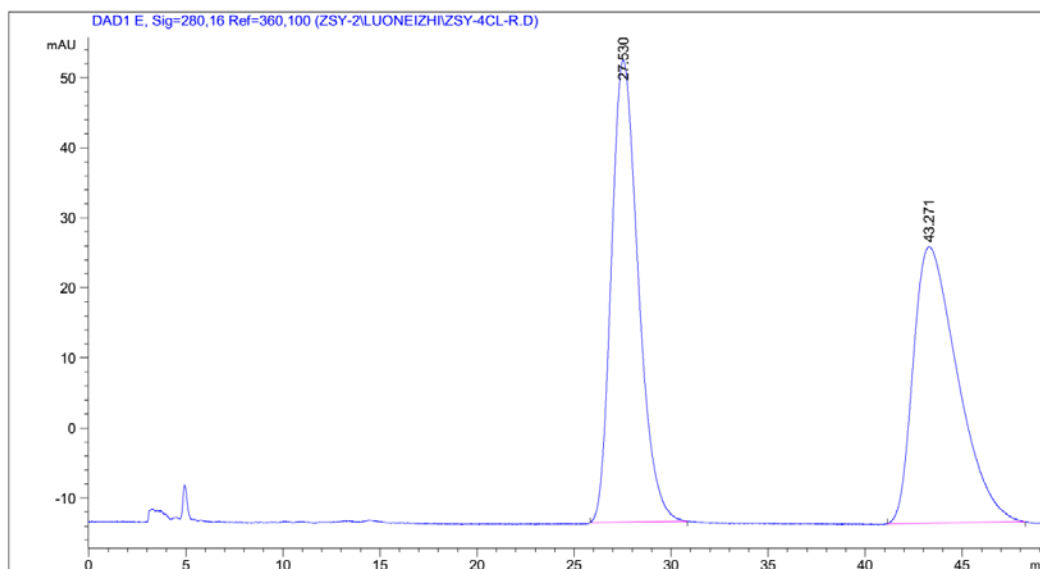

| Peak | Processed channel | Retention time (min) | Peak area (mAU*s) | Peak height (mAU) | Peak area (%) |
|------|-------------------|----------------------|-------------------|-------------------|---------------|
| 1    | PDA 280.16 nm     | 27.530               | 6358.36572        | 66.00119          | 50.38         |
| 2    | PDA 280.16 nm     | 43.271               | 6261.76416        | 39.47338          | 49.62         |

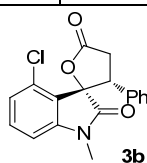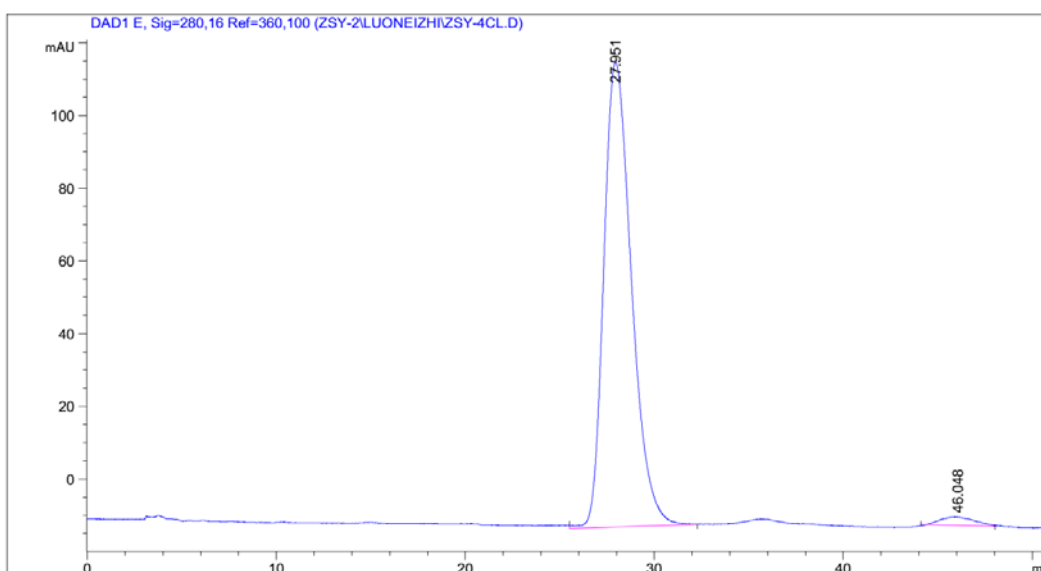

| Peak | Processed channel | Retention time (min) | Peak area (mAU*s) | Peak height (mAU) | Peak area (%) |
|------|-------------------|----------------------|-------------------|-------------------|---------------|
| 1    | PDA 280.16 nm     | 27.951               | 1.30335 e4        | 127.79919         | 97.72         |
| 2    | PDA 280.16 nm     | 46.048               | 304.04662         | 2.38757           | 2.28          |

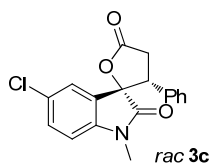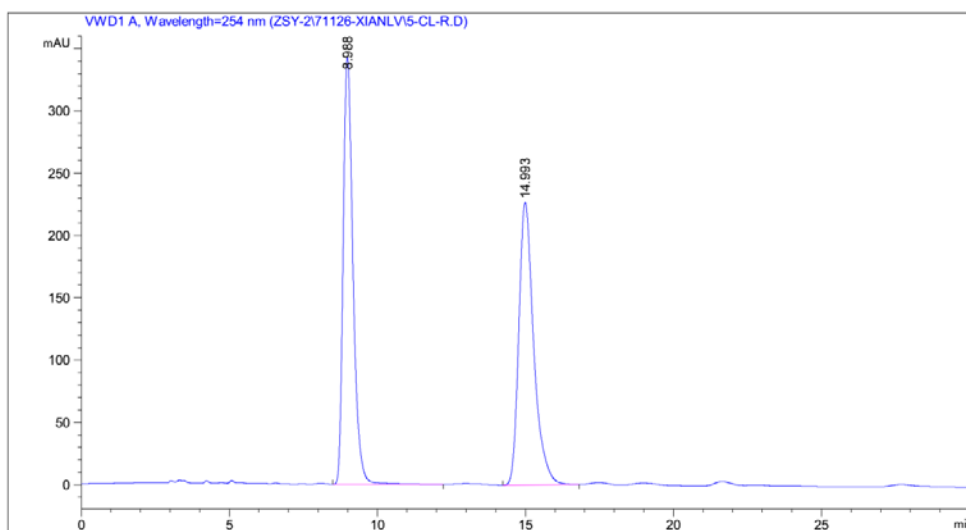

| Peak | Processed channel | Retention time (min) | Peak area (mAU*s) | Peak height (mAU) | Peak area (%) |
|------|-------------------|----------------------|-------------------|-------------------|---------------|
| 1    | PDA 254 nm        | 8.988                | 7917.94434        | 342.60480         | 49.99         |
| 2    | PDA 254 nm        | 14.993               | 7918.29199        | 226.89465         | 50.01         |

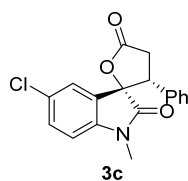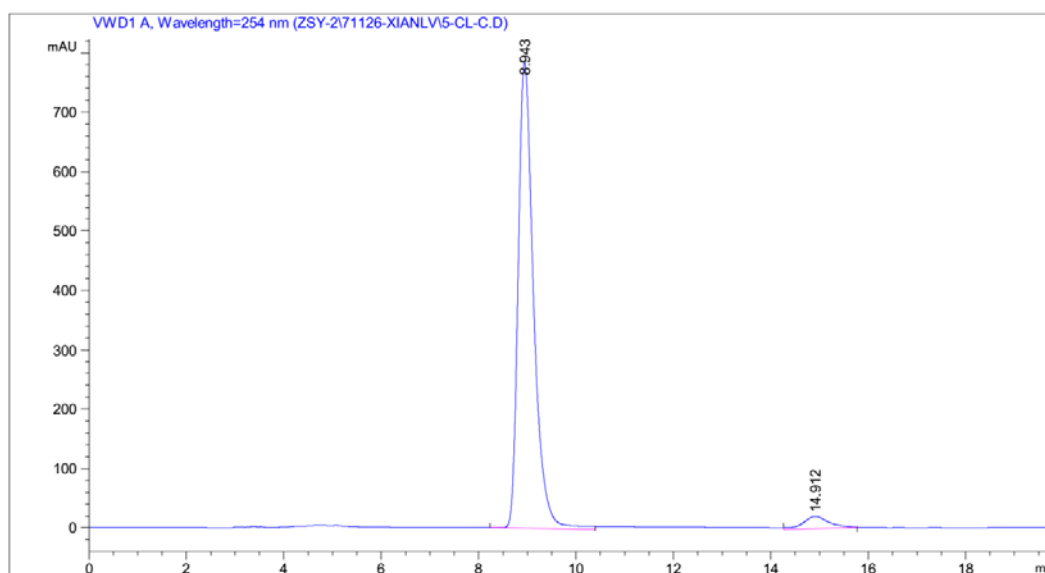

| Peak | Processed channel | Retention time (min) | Peak area (mAU*s) | Peak height (mAU) | Peak area (%) |
|------|-------------------|----------------------|-------------------|-------------------|---------------|
| 1    | PDA 254 nm        | 8.943                | 1.72543e4         | 785.07922         | 95.84         |
| 2    | PDA 254 nm        | 14.912               | 749.80920         | 20.46606          | 4.16          |

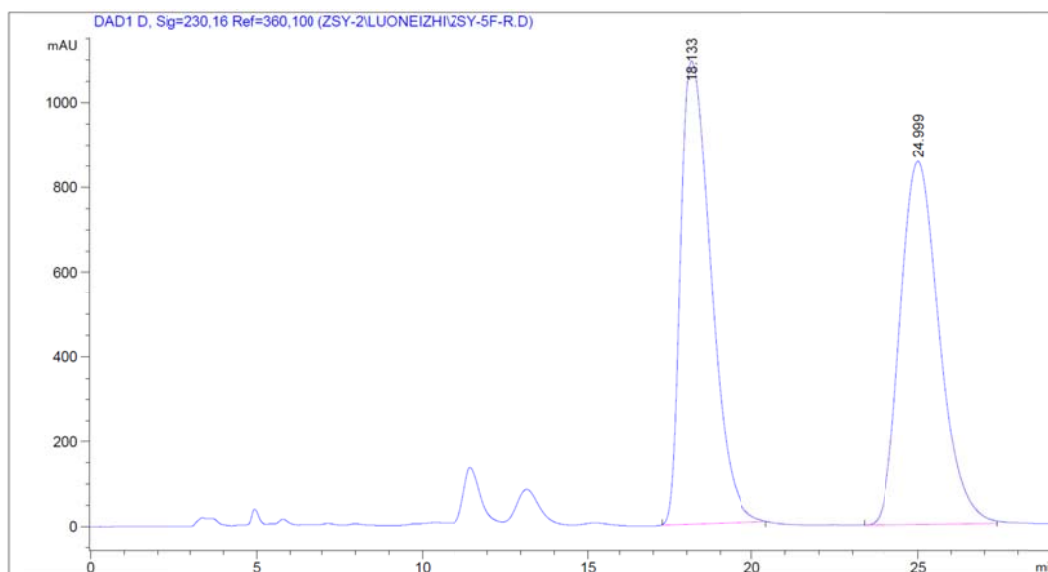

| Peak | Processed channel | Retention time (min) | Peak area (mAU*s) | Peak height (mAU) | Peak area (%) |
|------|-------------------|----------------------|-------------------|-------------------|---------------|
| 1    | PDA 230.16 nm     | 18.133               | 6.92980e4         | 1092.24377        | 49.70         |
| 2    | PDA 230.16nm      | 24.999               | 7.01397e4         | 856.33618         | 50.30         |

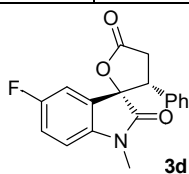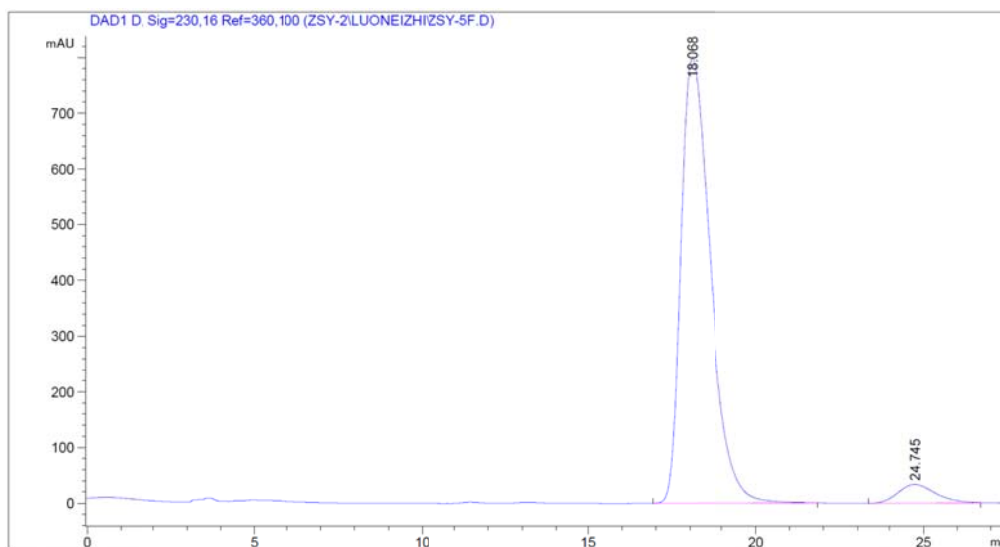

| Peak | Processed channel | Retention time (min) | Peak area (mAU*s) | Peak height (mAU) | Peak area (%) |
|------|-------------------|----------------------|-------------------|-------------------|---------------|
| 1    | PDA 230.16 nm     | 18.068               | 4.95033e4         | 798.68909         | 96.36         |
| 2    | PDA 230.16 nm     | 24.745               | 2567.60522        | 33.54792          | 3.64          |

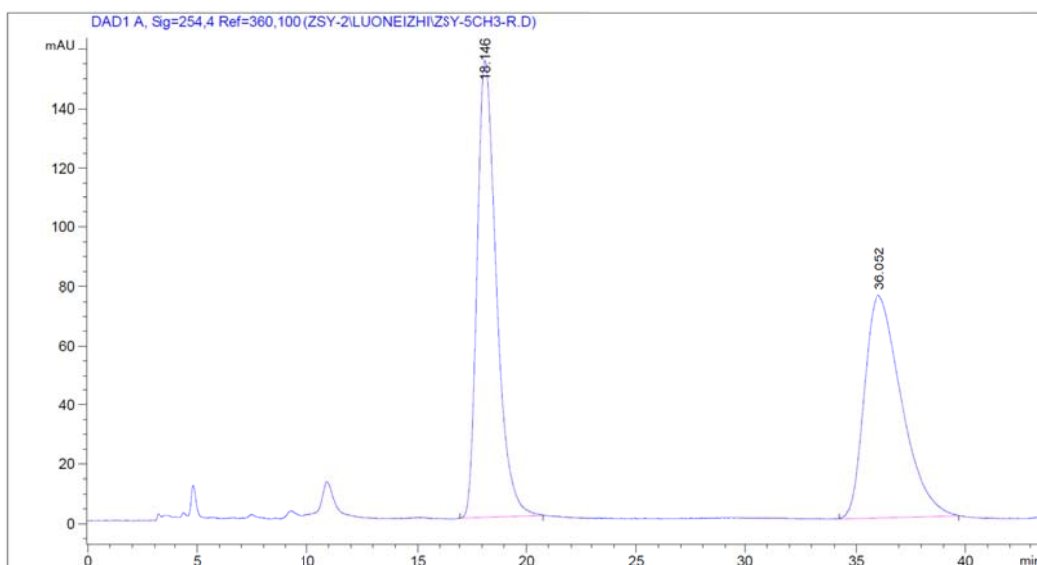

| Peak | Processed channel | Retention time (min) | Peak area (mAU*s) | Peak height (mAU) | Peak area (%) |
|------|-------------------|----------------------|-------------------|-------------------|---------------|
| 1    | PDA 254 nm        | 18.146               | 9285.13867        | 154.11418         | 50.76         |
| 2    | PDA 254 nm        | 36.052               | 9008.18945        | 75.27971          | 49.24         |

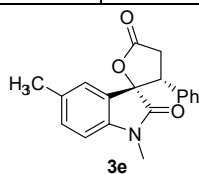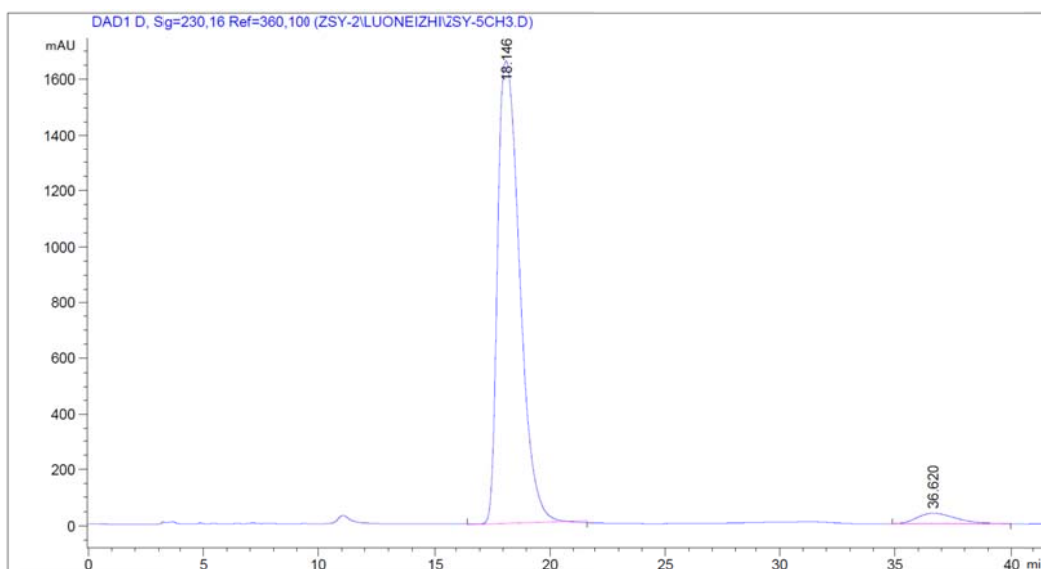

| Peak | Processed channel | Retention time (min) | Peak area (mAU*s) | Peak height (mAU) | Peak area (%) |
|------|-------------------|----------------------|-------------------|-------------------|---------------|
| 1    | PDA 254 nm        | 18.146               | 1.07854e5         | 1655.87183        | 98.65         |
| 2    | PDA 254 nm        | 36.620               | 4413.67285        | 37.71472          | 1.35          |

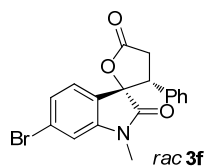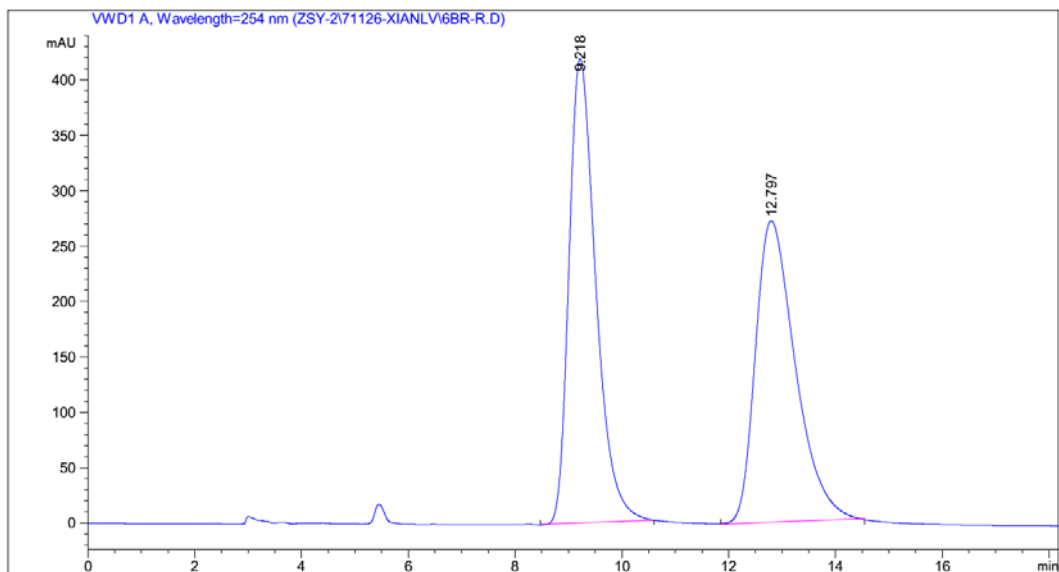

| Peak | Processed channel | Retention time (min) | Peak area (mAU*s) | Peak height (mAU) | Peak area (%) |
|------|-------------------|----------------------|-------------------|-------------------|---------------|
| 1    | PDA 254 nm        | 9.218                | 1.45982e4         | 419.09821         | 50.89         |
| 2    | PDA 254 nm        | 12.797               | 1.40889e4         | 272.19839         | 49.11         |

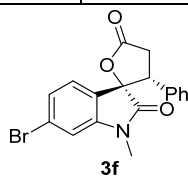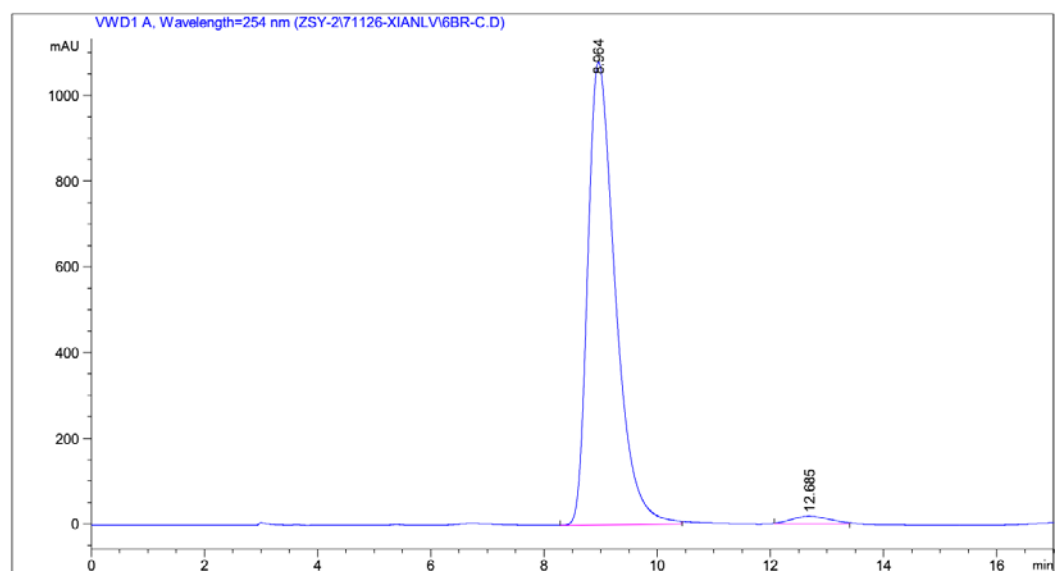

| Peak | Processed channel | Retention time (min) | Peak area (mAU*s) | Peak height (mAU) | Peak area (%) |
|------|-------------------|----------------------|-------------------|-------------------|---------------|
| 1    | PDA 254 nm        | 8.964                | 3.65524e4         | 1081.66357        | 98.35         |
| 2    | PDA 254 nm        | 12.685               | 829.90753         | 18.17889          | 1.65          |

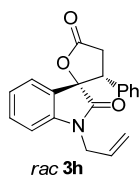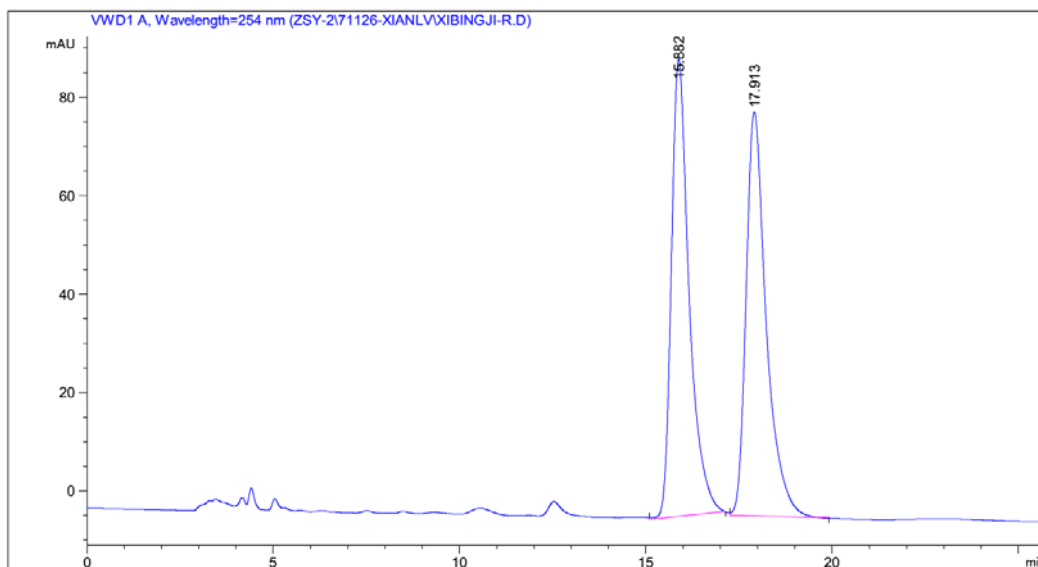

| Peak | Processed channel | Retention time (min) | Peak area (mAU*s) | Peak height (mAU) | Peak area (%) |
|------|-------------------|----------------------|-------------------|-------------------|---------------|
| 1    | PDA 254 nm        | 15.882               | 3081.38013        | 92.98299          | 49.96         |
| 2    | PDA 254 nm        | 17.913               | 3086.50464        | 82.17327          | 50.04         |

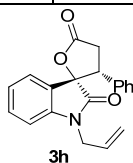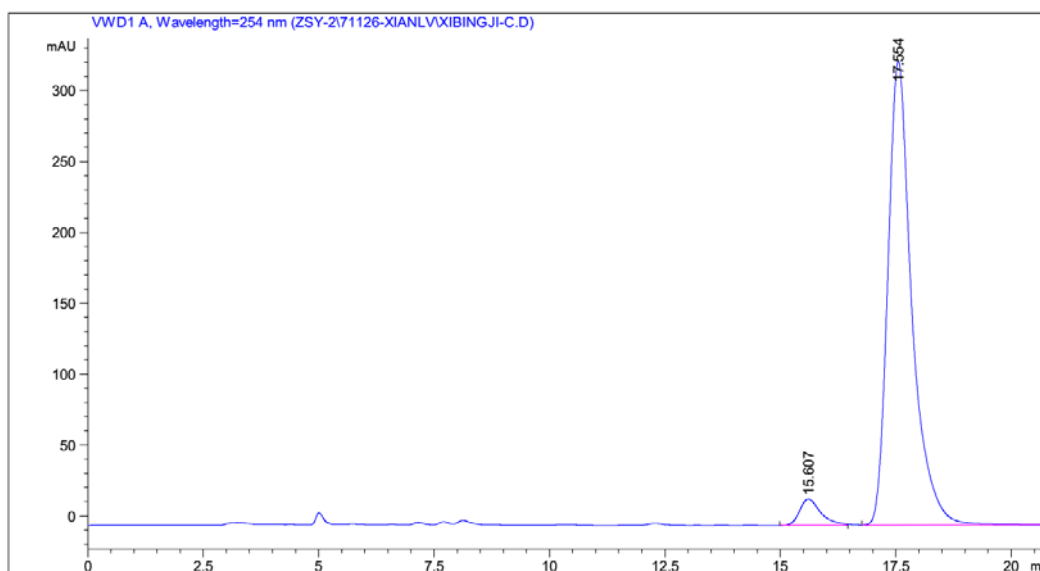

| Peak | Processed channel | Retention time (min) | Peak area (mAU*s) | Peak height (mAU) | Peak area (%) |
|------|-------------------|----------------------|-------------------|-------------------|---------------|
| 1    | PDA 254 nm        | 15.607               | 579.02112         | 18.36727          | 3.48          |
| 2    | PDA 254 nm        | 17.554               | 1.18044e4         | 327.30682         | 97.52         |

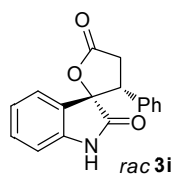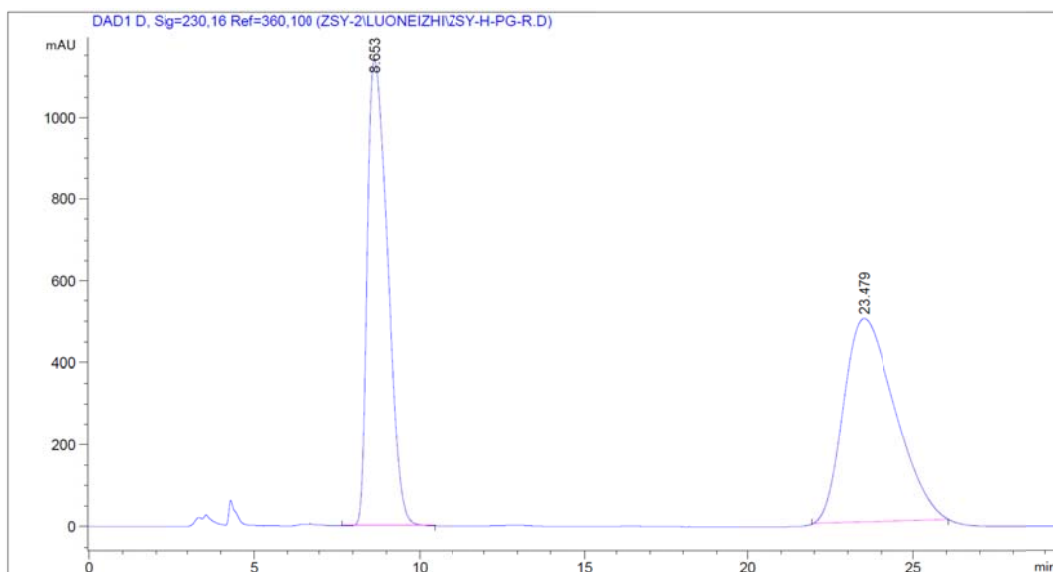

| Peak | Processed channel | Retention time (min) | Peak area (mAU*s) | Peak height (mAU) | Peak area (%) |
|------|-------------------|----------------------|-------------------|-------------------|---------------|
| 1    | PDA 230 nm        | 8.653                | 4.77599e4         | 1134.67993        | 48.86         |
| 2    | PDA 230nm         | 23.479               | 5.41531e4         | 495.64865         | 51.14         |

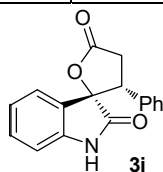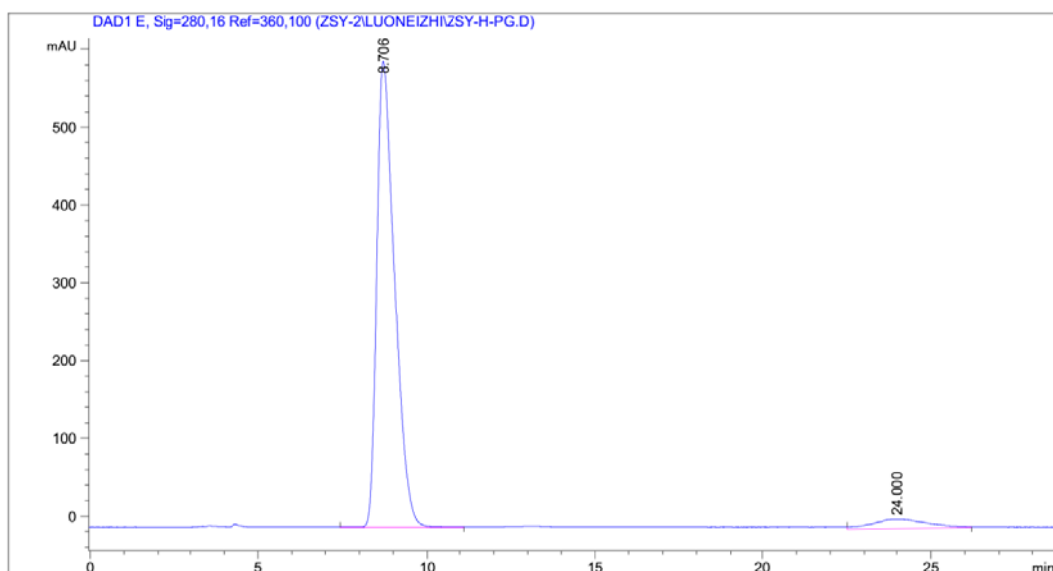

| Peak | Processed channel | Retention time (min) | Peak area (mAU*s) | Peak height (mAU) | Peak area (%) |
|------|-------------------|----------------------|-------------------|-------------------|---------------|
| 1    | PDA 254nm         | 8.706                | 2.19020e4         | 599.54016         | 97.41         |
| 2    | PDA 254nm         | 24.000               | 536.45471         | 7.34325           | 2.59          |



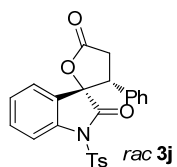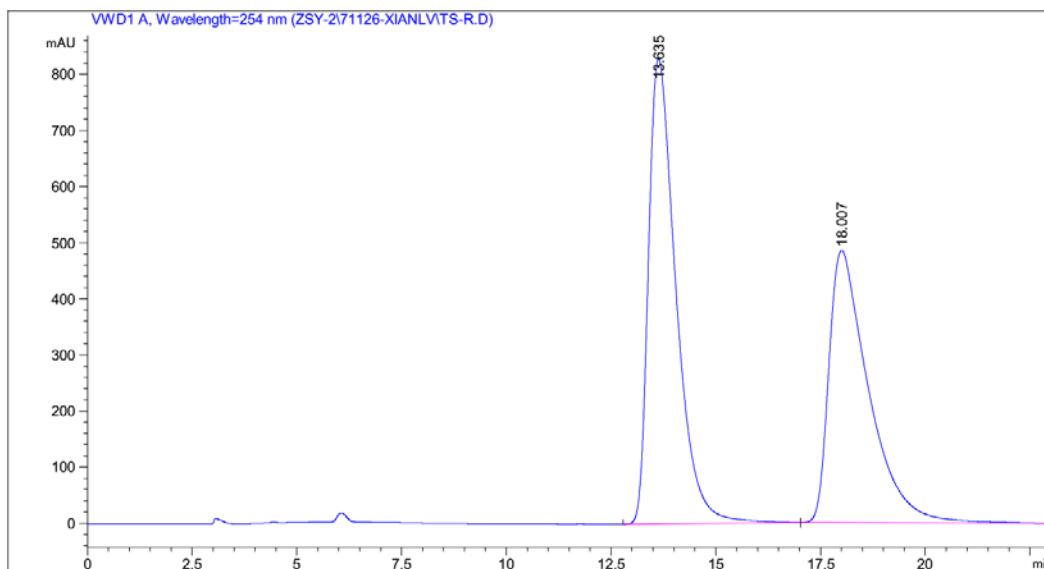

| Peak | Processed channel | Retention time (min) | Peak area (mAU*s) | Peak height (mAU) | Peak area (%) |
|------|-------------------|----------------------|-------------------|-------------------|---------------|
| 1    | PDA 254 nm        | 13.635               | 3.77319e4         | 828.47968         | 52.17         |
| 2    | PDA 254 nm        | 18.007               | 3.19220e4         | 485.59973         | 47.83         |

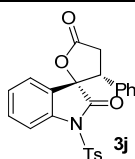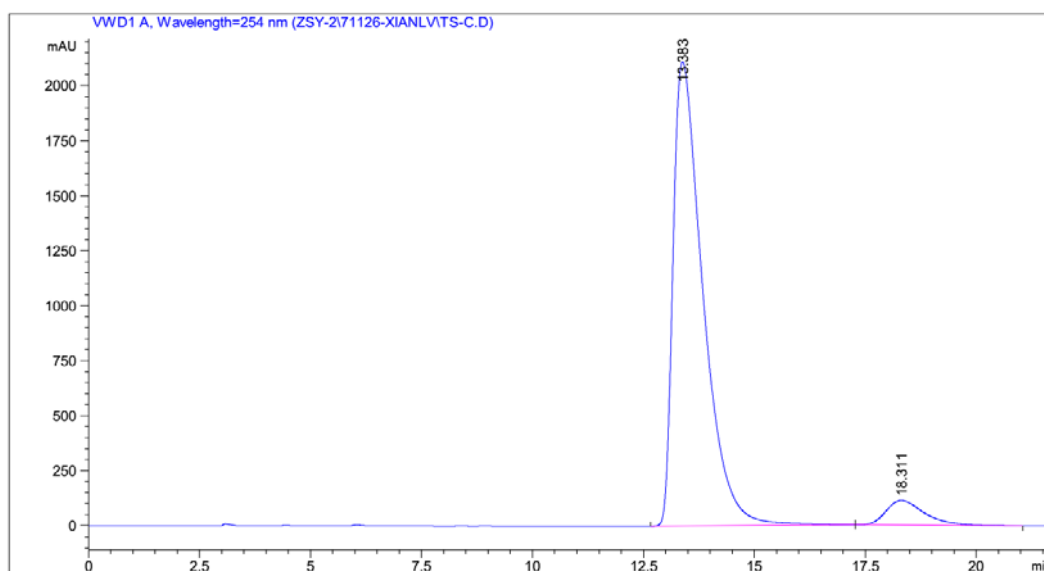

| Peak | Processed channel | Retention time (min) | Peak area (mAU*s) | Peak height (mAU) | Peak area (%) |
|------|-------------------|----------------------|-------------------|-------------------|---------------|
| 1    | PDA 254 nm        | 13.383               | 9.87124e4         | 2109.53125        | 93.55         |
| 2    | PDA 254 nm        | 18.311               | 6810.26416        | 111.99897         | 6.45          |

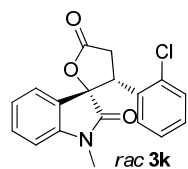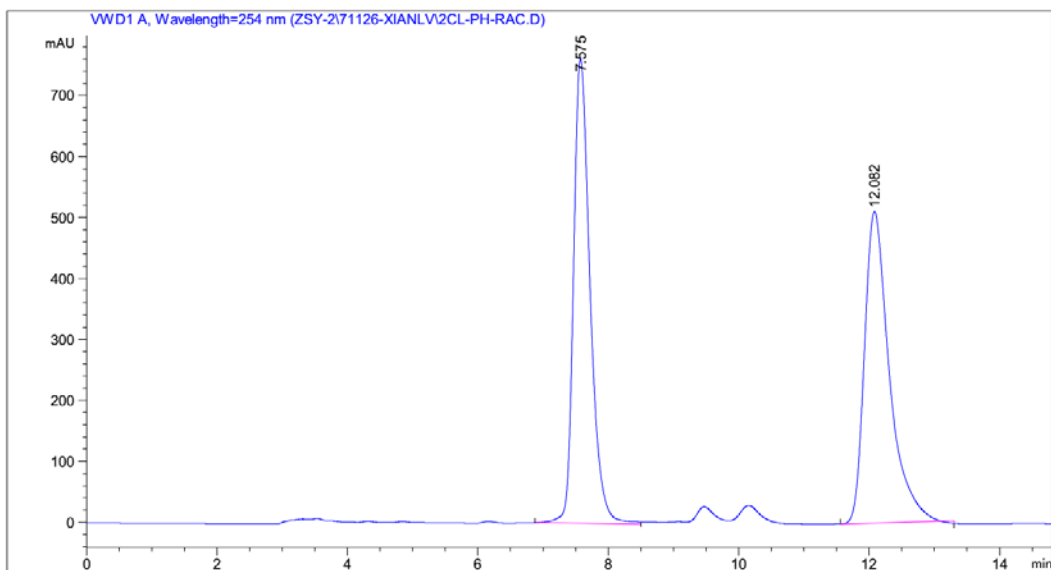

| Peak | Processed channel | Retention time (min) | Peak area (mAU*s) | Peak height (mAU) | Peak area (%) |
|------|-------------------|----------------------|-------------------|-------------------|---------------|
| 1    | PDA254 nm         | 7.575                | 1.34514e4         | 761.84167         | 49.81         |
| 2    | PDA254 nm         | 12.082               | 1.35545e4         | 511.35513         | 50.19         |

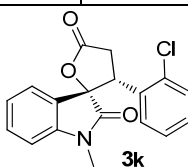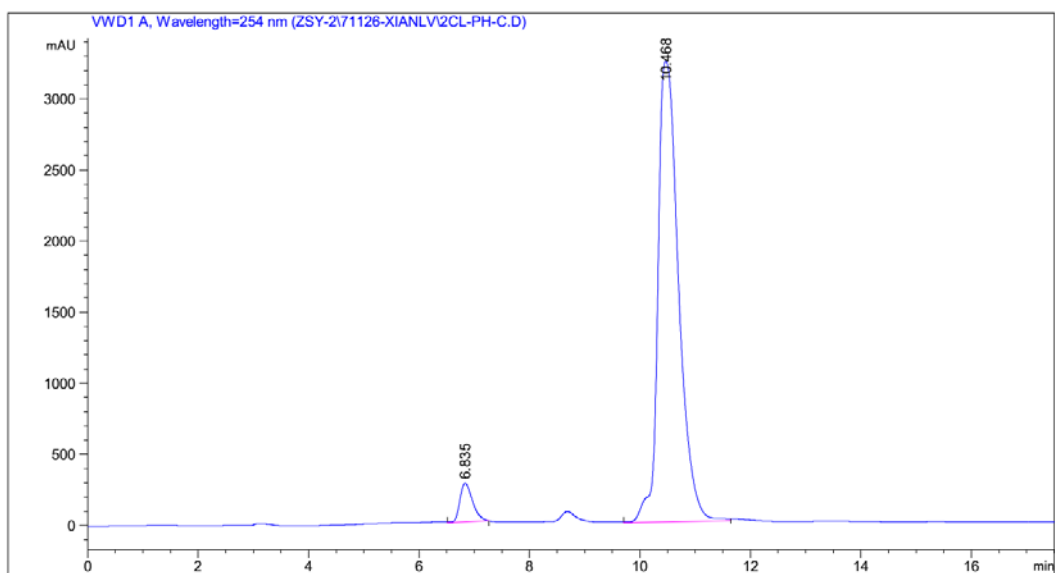

| Peak | Processed channel | Retention time (min) | Peak area (mAU*s) | Peak height (mAU) | Peak area (%) |
|------|-------------------|----------------------|-------------------|-------------------|---------------|
| 1    | PDA 254 nm        | 6.835                | 4330.88037        | 272.07785         | 4.88          |
| 2    | PDA 254 nm        | 10.468               | 8.43472e4         | 3241.88672        | 95.11         |

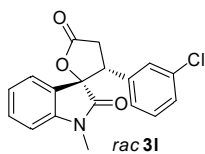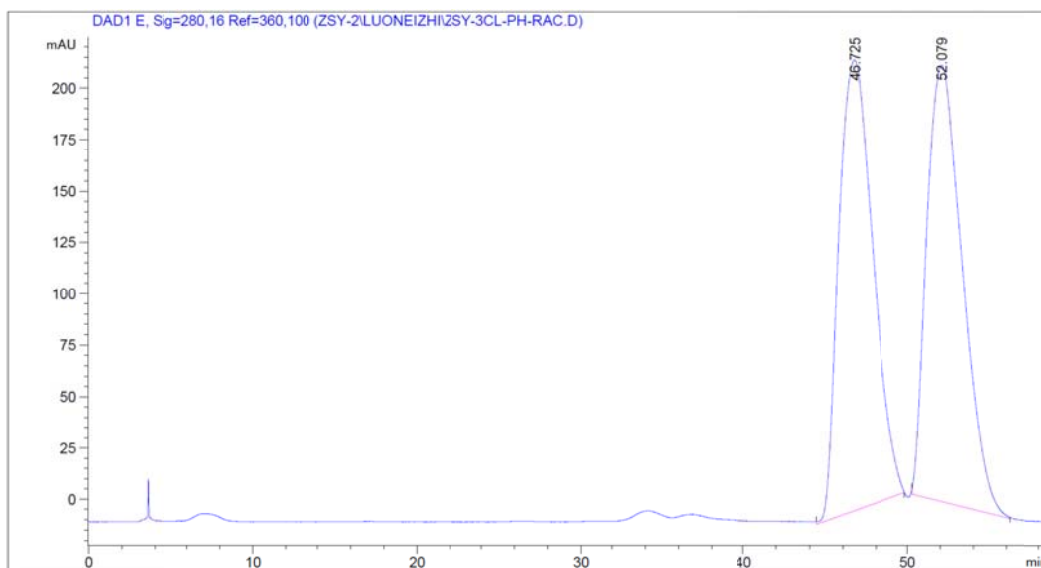

| Peak | Processed channel | Retention time (min) | Peak area (mAU*s) | Peak height (mAU) | Peak area (%) |
|------|-------------------|----------------------|-------------------|-------------------|---------------|
| 1    | PDA 280 nm        | 46.725               | 3.16768e4         | 219.19832         | 49.92         |
| 2    | PDA 280 nm        | 52.079               | 3.17813e4         | 212.05476         | 50.08         |

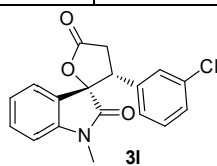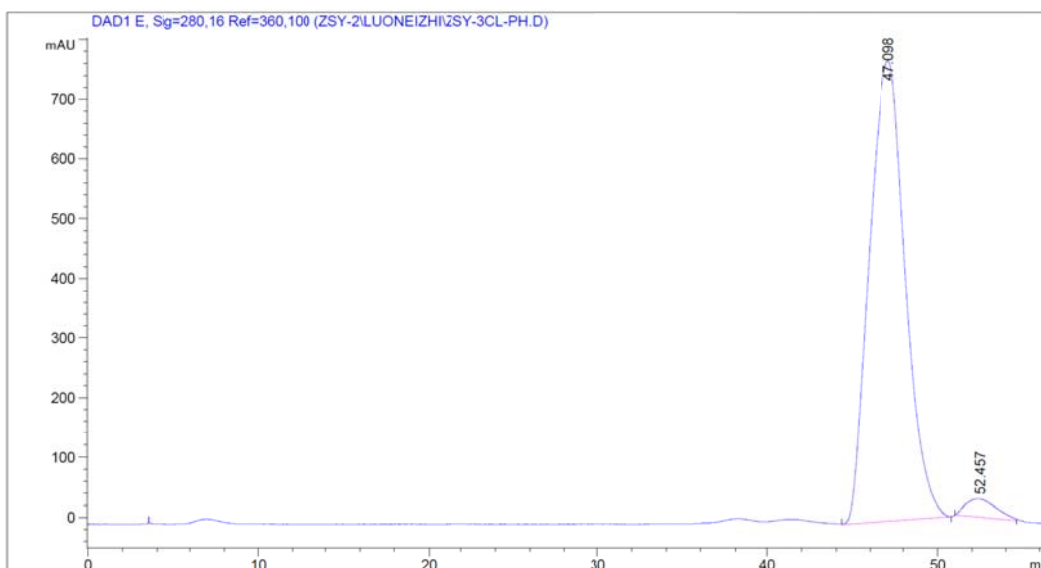

| Peak | Processed channel | Retention time (min) | Peak area (mAU*s) | Peak height (mAU) | Peak area (%) |
|------|-------------------|----------------------|-------------------|-------------------|---------------|
| 1    | PDA 280 nm        | 47.098               | 1.15041e5         | 771.53644         | 96.84         |
|      | PDA 280 nm        | 52.457               | 3761.53516        | 30.25532          | 3.16          |

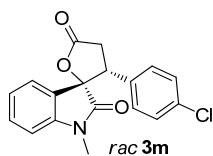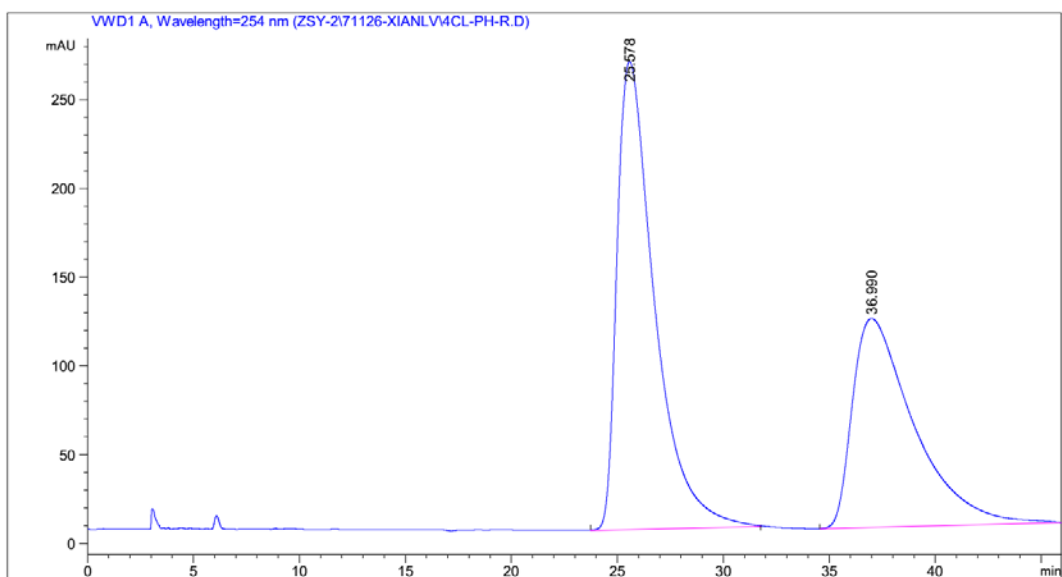

| Peak | Processed channel | Retention time (min) | Peak area (mAU*s) | Peak height (mAU) | Peak area (%) |
|------|-------------------|----------------------|-------------------|-------------------|---------------|
| 1    | PDA 254 nm        | 25.578               | 3.24891e4         | 263.87503         | 54.85         |
| 2    | PDA 254 nm        | 36.990               | 2.36690e4         | 117.73990         | 45.15         |

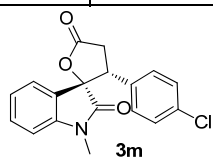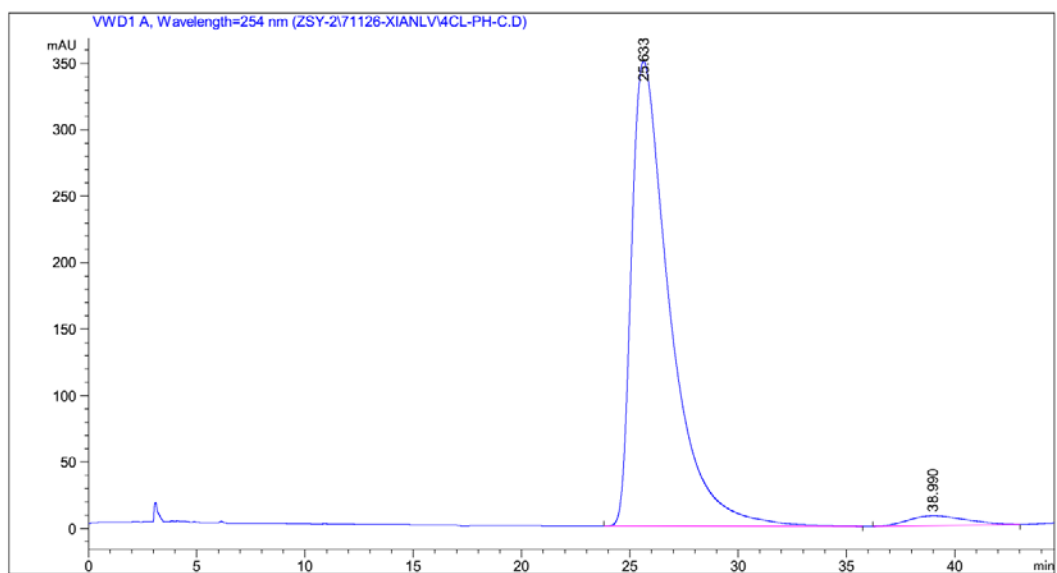

| Peak | Processed channel | Retention time (min) | Peak area (mAU*s) | Peak height (mAU) | Peak area (%) |
|------|-------------------|----------------------|-------------------|-------------------|---------------|
| 1    | PDA 254 nm        | 25.633               | 4.27842e4         | 349.75385         | 97.03         |
| 2    | PDA 254 nm        | 38.990               | 1309.70886        | 7.17981           | 2.97          |

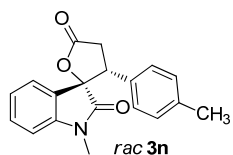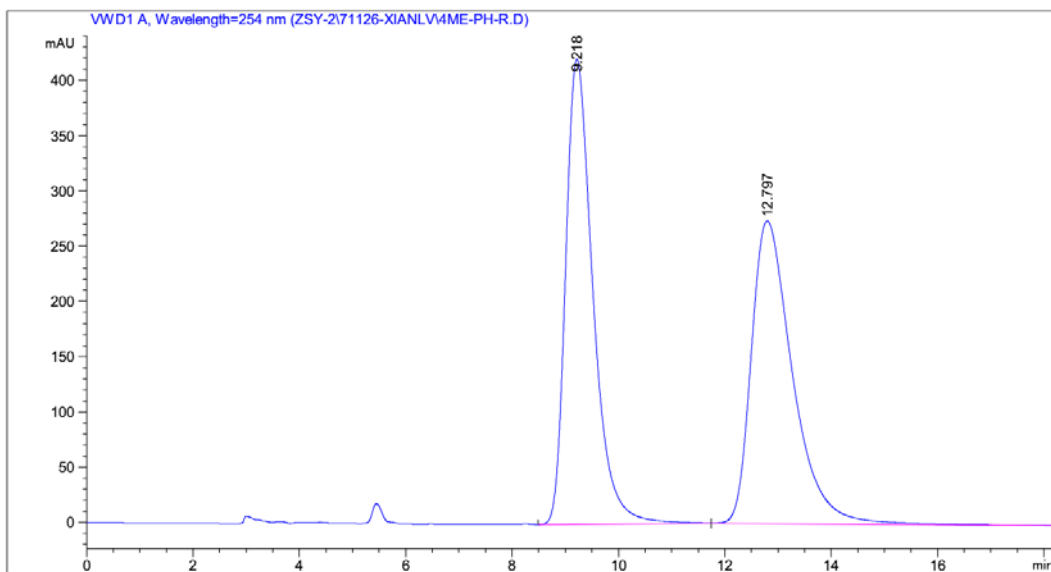

| Peak | Processed channel | Retention time (min) | Peak area (mAU*s) | Peak height (mAU) | Peak area (%) |
|------|-------------------|----------------------|-------------------|-------------------|---------------|
| 1    | PDA 254 nm        | 9.218                | 1.49308e4         | 420.64984         | 50.44         |
| 2    | PDA 254 nm        | 12.797               | 1.46730e4         | 273.82755         | 49.56         |

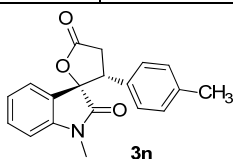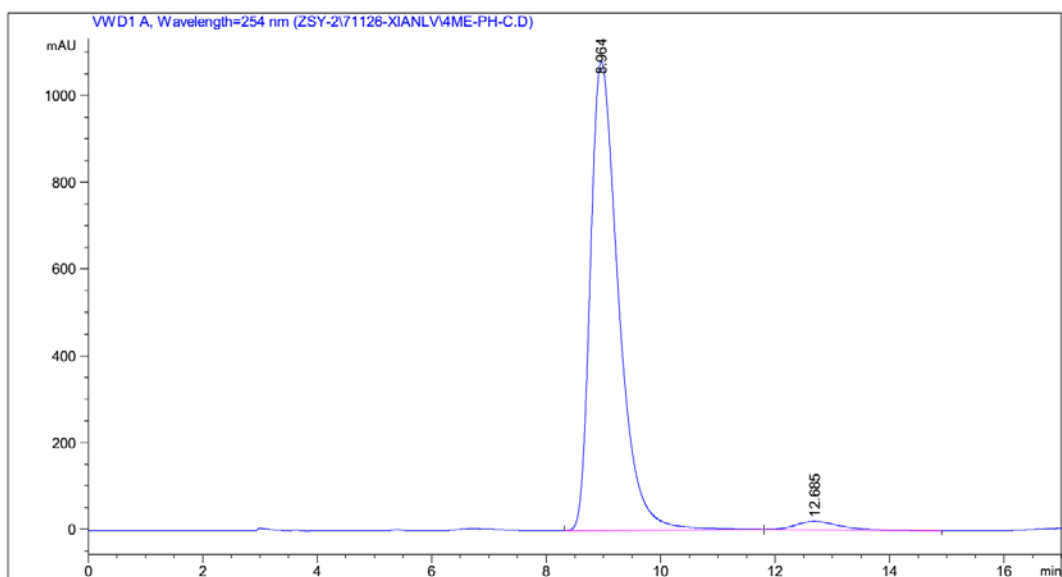

| Peak | Processed channel | Retention time (min) | Peak area (mAU*s) | Peak height (mAU) | Peak area (%) |
|------|-------------------|----------------------|-------------------|-------------------|---------------|
| 1    | PDA 254 nm        | 8.964                | 3.67620e4         | 1081.23206        | 98.62         |
| 2    | PDA 254 nm        | 12.685               | 987.95496         | 19.28213          | 1.38          |

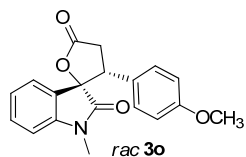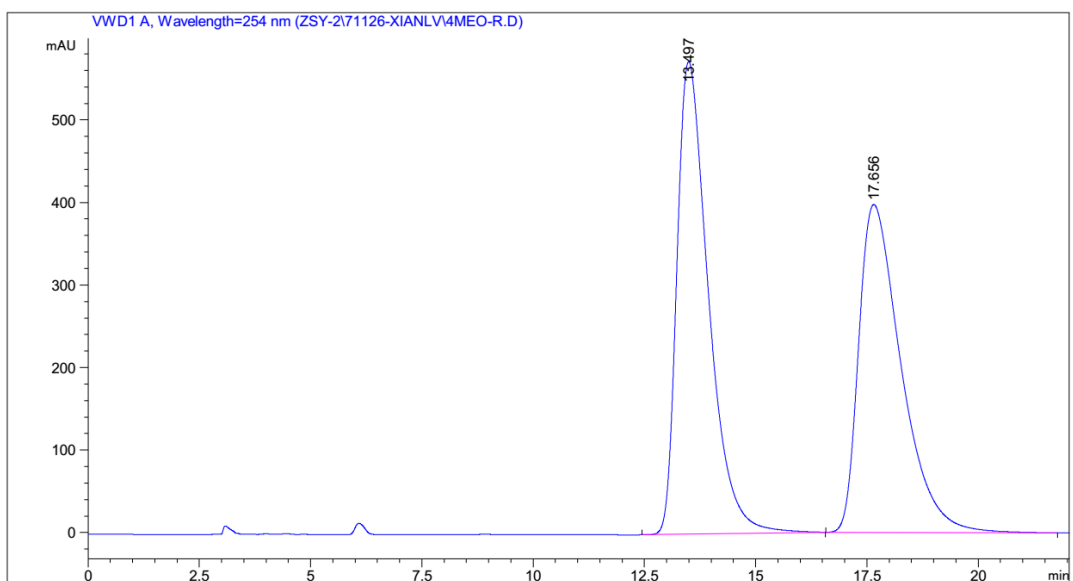

| Peak | Processed channel | Retention time (min) | Peak area (mAU*s) | Peak height (mAU) | Peak area (%) |
|------|-------------------|----------------------|-------------------|-------------------|---------------|
| 1    | PDA 254 nm        | 13.497               | 2.82043e4         | 572.54382         | 51.74         |
| 2    | PDA 254 nm        | 17.656               | 2.63089e4         | 397.30475         | 48.26         |

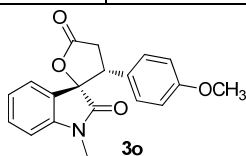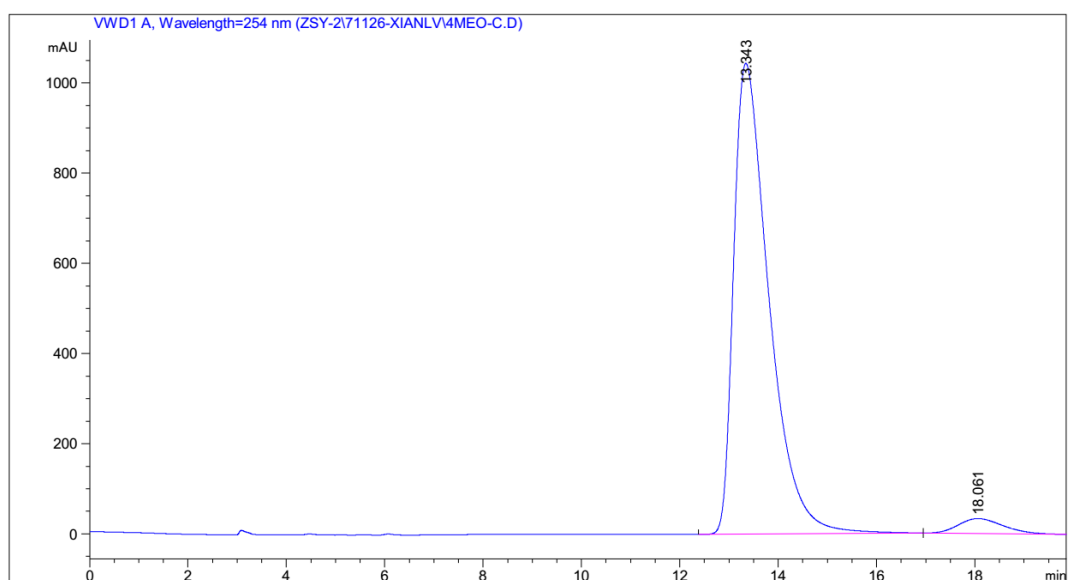

| Peak | Processed channel | Retention time (min) | Peak area (mAU*s) | Peak height (mAU) | Peak area (%) |
|------|-------------------|----------------------|-------------------|-------------------|---------------|
| 1    | PDA 254 nm        | 13.443               | 5.19571e4         | 1044.12244        | 97.66         |
| 2    | PDA 254 nm        | 18.061               | 2105.10522        | 33.10919          | 2.34          |

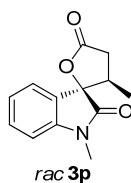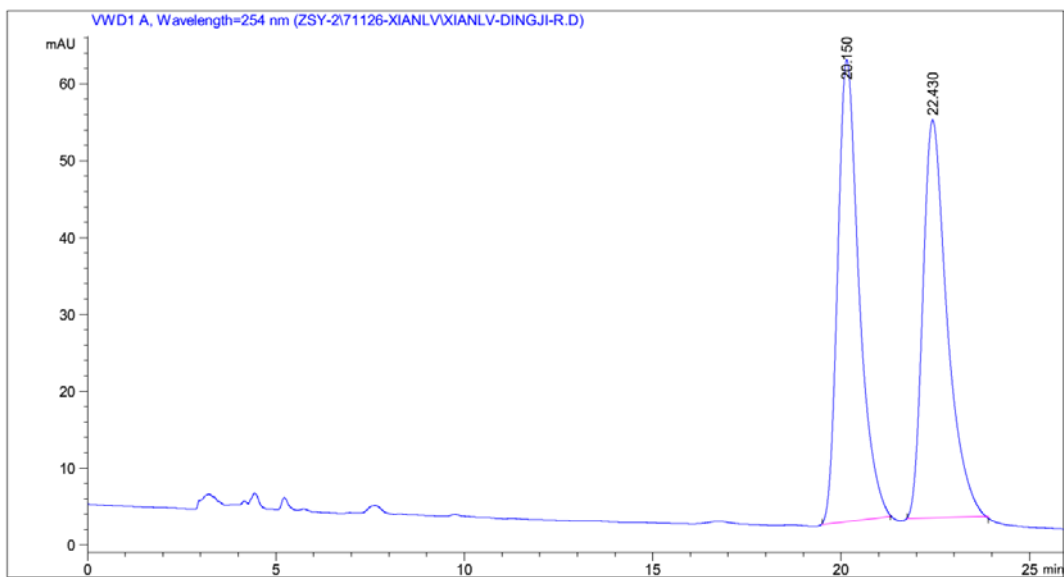

| Peak | Processed channel | Retention time (min) | Peak area (mAU*s) | Peak height (mAU) | Peak area (%) |
|------|-------------------|----------------------|-------------------|-------------------|---------------|
| 1    | PDA 254 nm        | 20.150               | 2371.76123        | 60.13734          | 50.52         |
| 2    | PDA 254 nm        | 22.430               | 2322.74219        | 51.78837          | 49.48         |

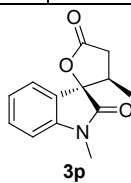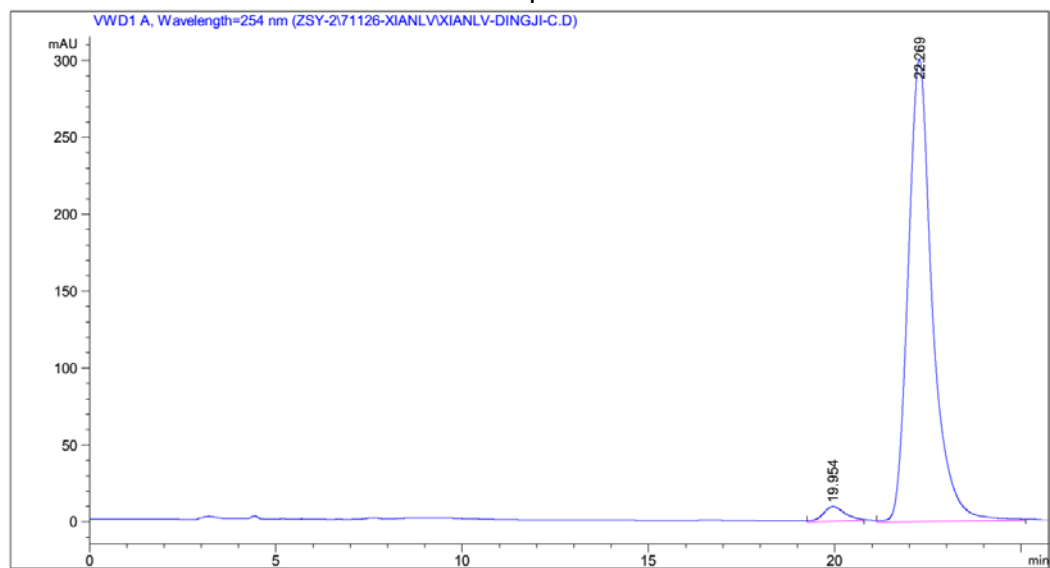

| Peak | Processed channel | Retention time (min) | Peak area (mAU*s) | Peak height (mAU) | Peak area (%) |
|------|-------------------|----------------------|-------------------|-------------------|---------------|
| 1    | PDA 254 nm        | 19.954               | 395.56198         | 9.58714           | 2.63          |
| 2    | PDA 254 nm        | 22.269               | 1.35730e4         | 300.62967         | 97.37         |

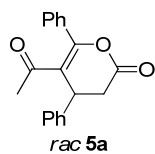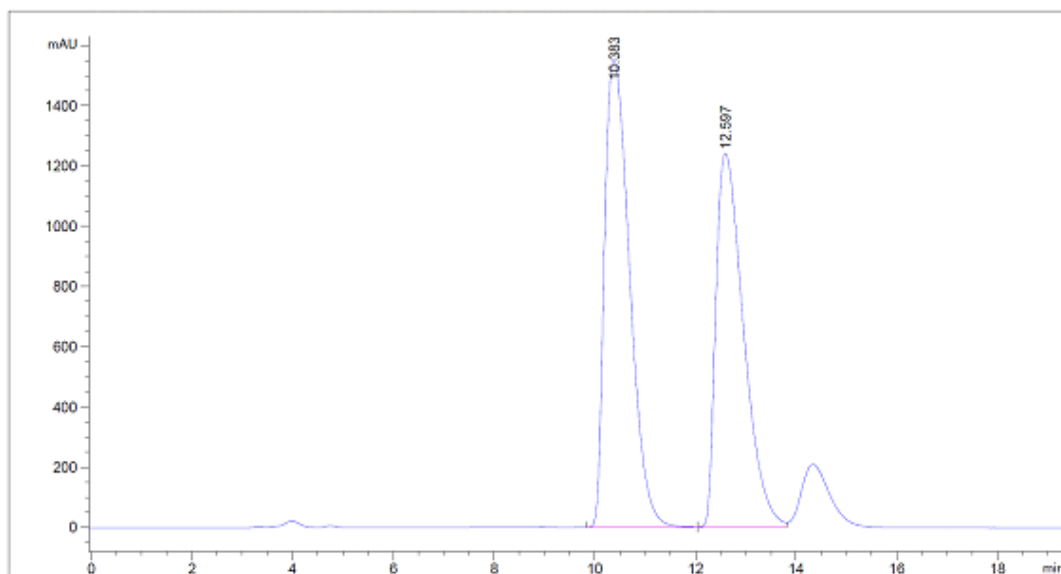

| Peak | Processed channel | Retention time (min) | Peak area (mAU*s) | Peak height (mAU) | Peak area (%) |
|------|-------------------|----------------------|-------------------|-------------------|---------------|
| 1    | PDA 280 nm        | 10.383               | 5.35277e4         | 1552.80420        | 53.07         |
| 2    | PDA 280 nm        | 12.597               | 4.73409e4         | 1240.23083        | 46.93         |

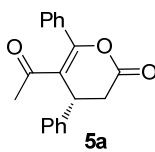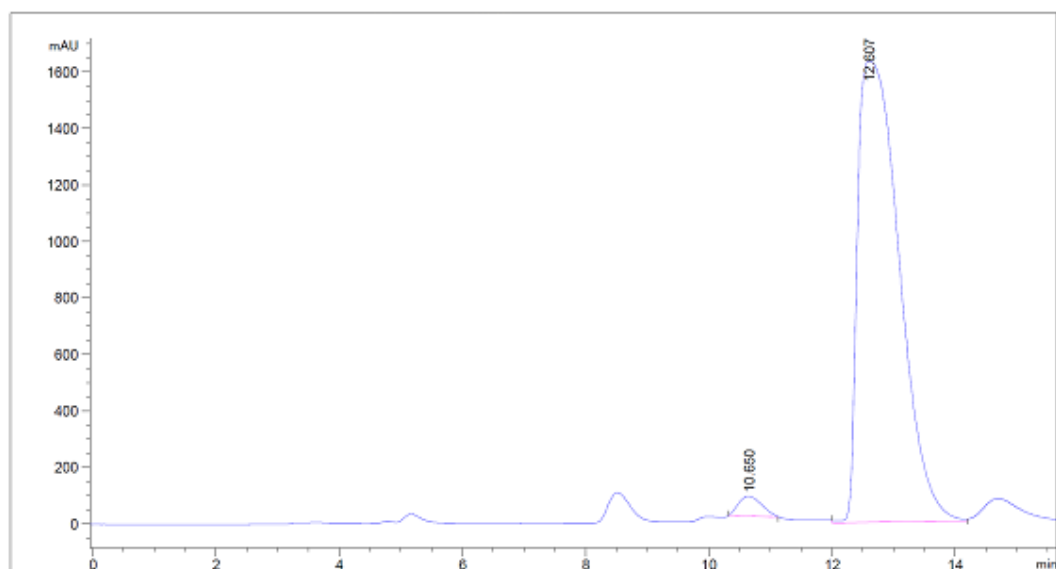

| Peak | Processed channel | Retention time (min) | Peak area (mAU*s) | Peak height (mAU) | Peak area (%) |
|------|-------------------|----------------------|-------------------|-------------------|---------------|
| 1    | PDA 280 nm        | 10.650               | 1852.39600        | 70.20706          | 2.36          |
| 2    | PDA 280 nm        | 12.607               | 7.65690e4         | 1633.32336        | 97.64         |



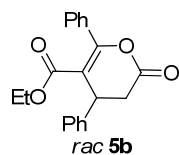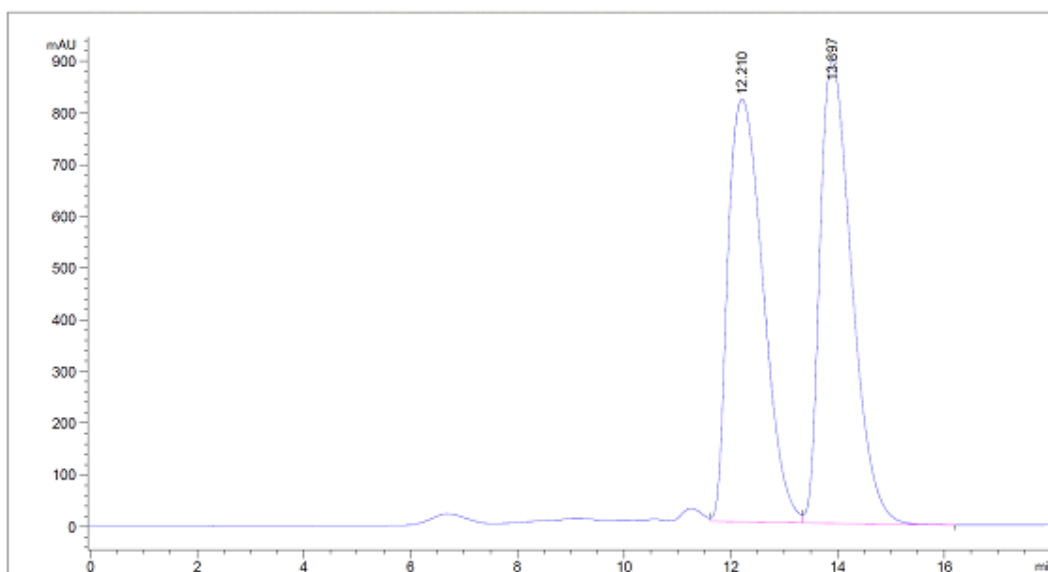

| Peak | Processed channel | Retention time (min) | Peak area (mAU*s) | Peak height (mAU) | Peak area (%) |
|------|-------------------|----------------------|-------------------|-------------------|---------------|
| 1    | PDA 280 nm        | 12.210               | 3.72243e4         | 817.08600         | 50.08         |
| 2    | PDA 280 nm        | 13.897               | 3.71014e4         | 894.90759         | 49.92         |

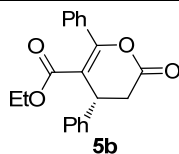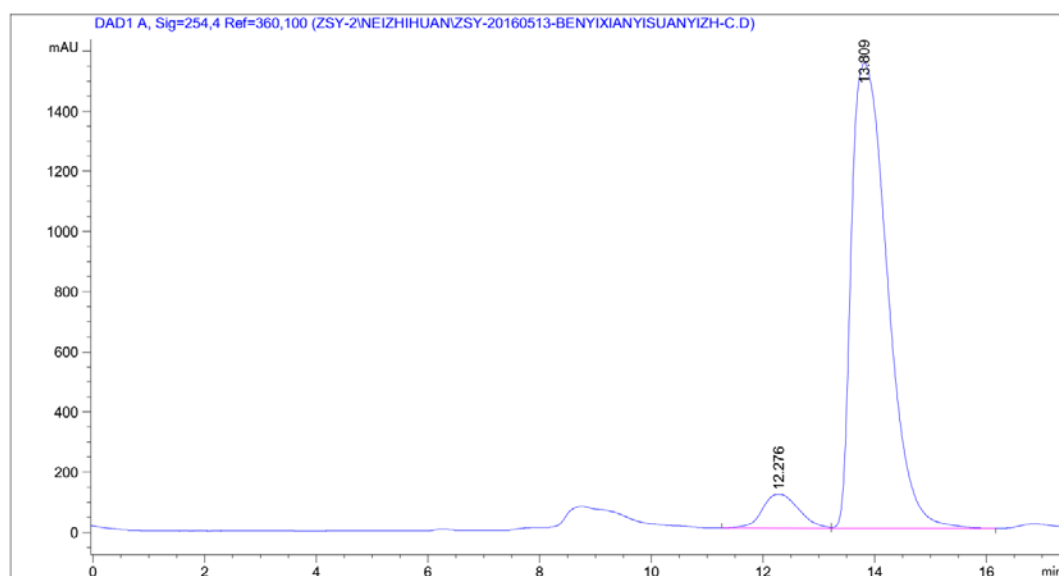

| Peak | Processed channel | Retention time (min) | Peak area (mAU*s) | Peak height (mAU) | Peak area (%) |
|------|-------------------|----------------------|-------------------|-------------------|---------------|
| 1    | PDA 280 nm        | 12.276               | 2582.92065        | 69.47312          | 4.35          |
| 2    | PDA 280 nm        | 13.809               | 5.46270e4         | 1304.64160        | 95.65         |

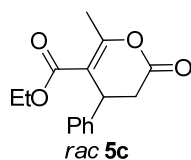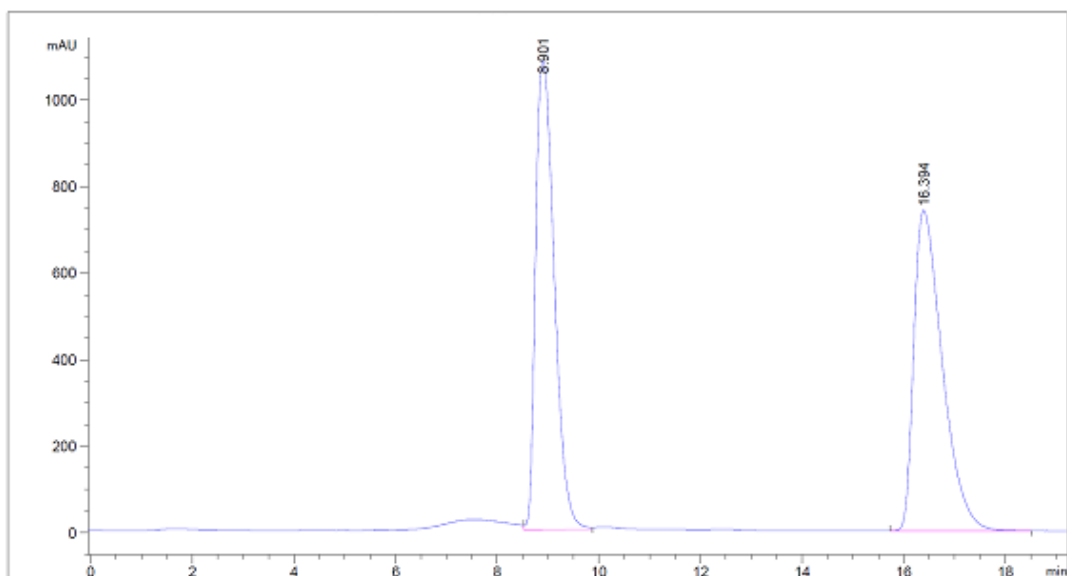

| Peak | Processed channel | Retention time (min) | Peak area (mAU*s) | Peak height (mAU) | Peak area (%) |
|------|-------------------|----------------------|-------------------|-------------------|---------------|
| 1    | PDA 230 nm        | 8.901                | 2.76678e4         | 1083.27173        | 48.95         |
| 2    | PDA 230 nm        | 16.394               | 2.88580e4         | 740.59827         | 51.05         |

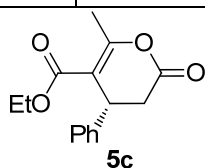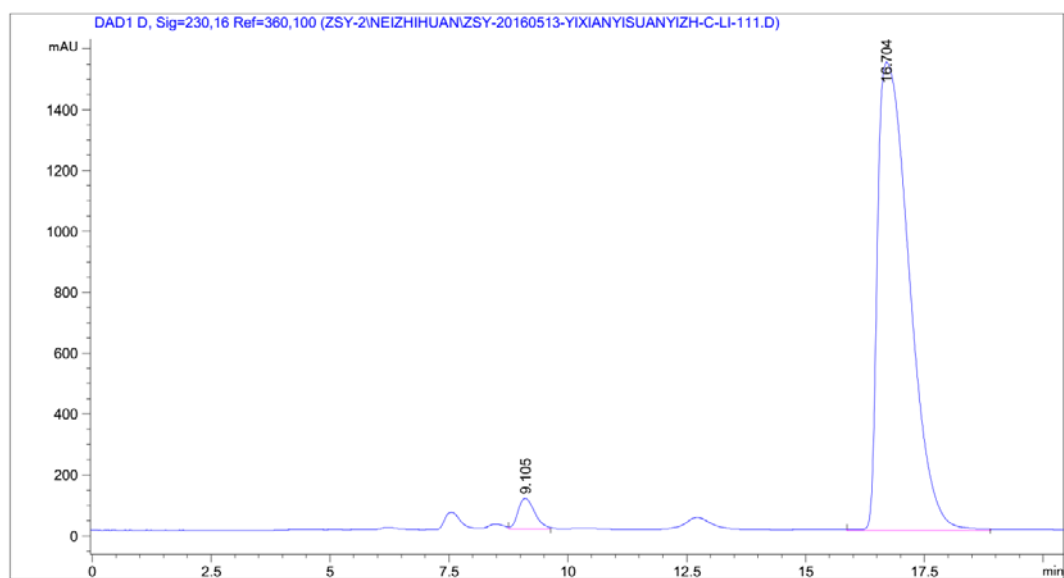

| Peak | Processed channel | Retention time (min) | Peak area (mAU*s) | Peak height (mAU) | Peak area (%) |
|------|-------------------|----------------------|-------------------|-------------------|---------------|
| 1    | PDA 230 nm        | 9.105                | 1835.94568        | 86.06533          | 2.44          |
| 2    | PDA 230 nm        | 16.704               | 7.05180e4         | 1534.99316        | 97.56         |

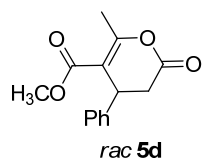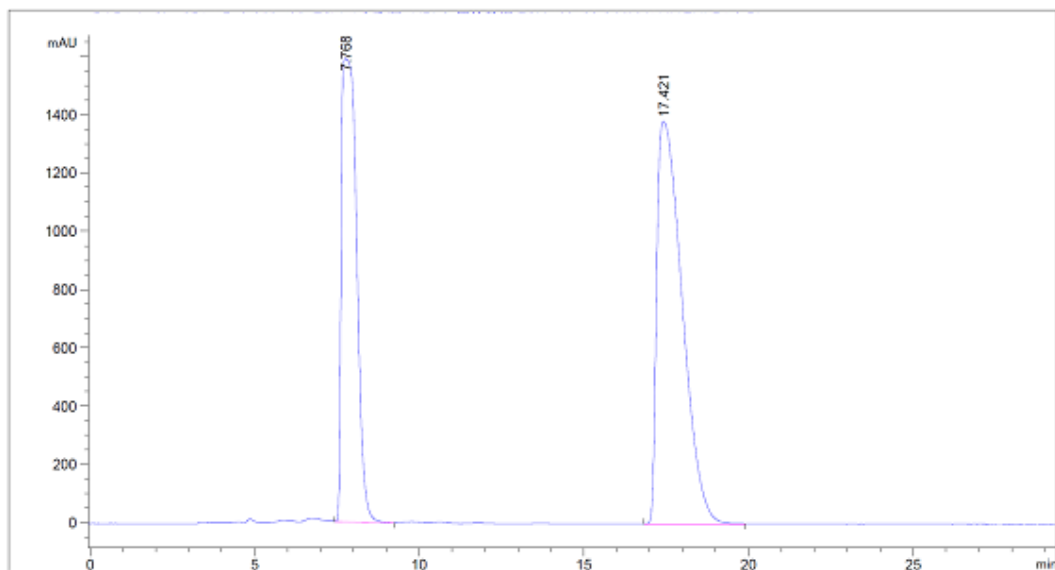

| Peak | Processed channel | Retention time (min) | Peak area (mAU*s) | Peak height (mAU) | Peak area (%) |
|------|-------------------|----------------------|-------------------|-------------------|---------------|
| 1    | PDA 254 nm        | 7.768                | 5.08243e4         | 1589.94666        | 45.87         |
| 2    | PDA 254 nm        | 17.421               | 7.35177e4         | 1381.68469        | 54.13         |

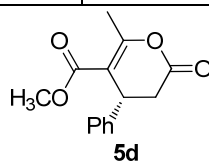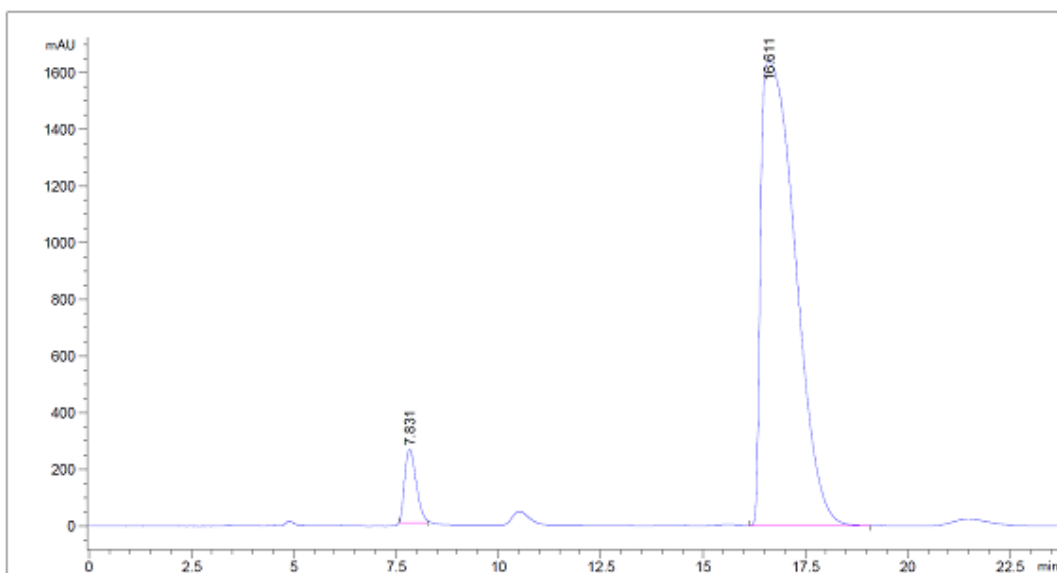

| Peak | Processed channel | Retention time (min) | Peak area (mAU*s) | Peak height (mAU) | Peak area (%) |
|------|-------------------|----------------------|-------------------|-------------------|---------------|
| 1    | PDA 254 nm        | 7.831                | 5082.59863        | 258.62338         | 4.46          |
| 2    | PDA 254 nm        | 16.611               | 9.53986e4         | 1641.20764        | 95.54         |

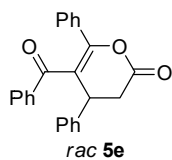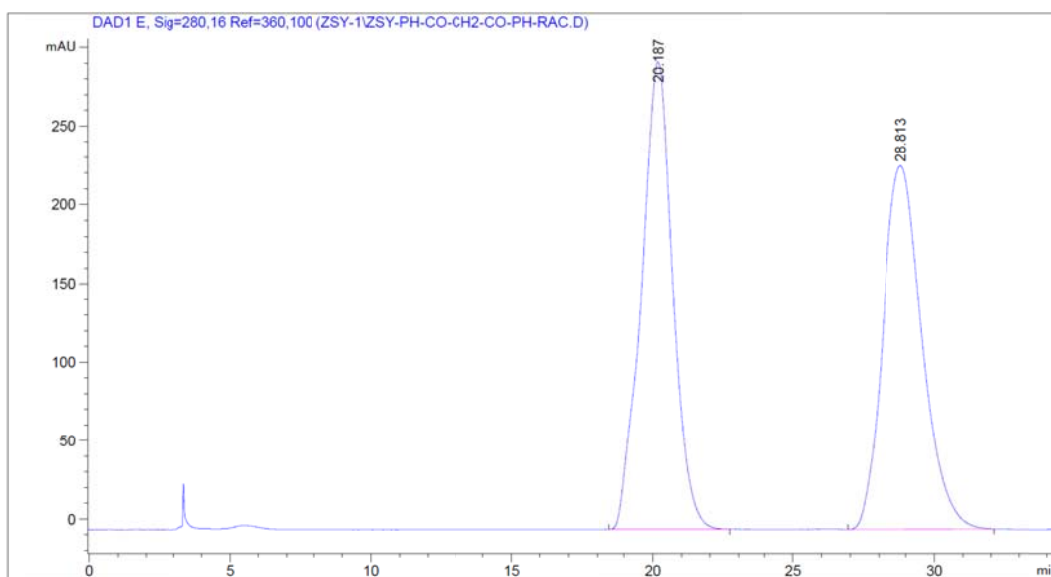

| Peak | Processed channel | Retention time (min) | Peak area (mAU*s) | Peak height (mAU) | Peak area (%) |
|------|-------------------|----------------------|-------------------|-------------------|---------------|
| 1    | PDA 254 nm        | 20.187               | 2.25771 e4        | 297.19433         | 50.03         |
| 2    | PDA 254 nm        | 28.813               | 2.25511 e4        | 228.92552         | 49.97         |

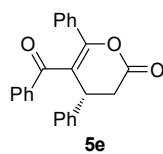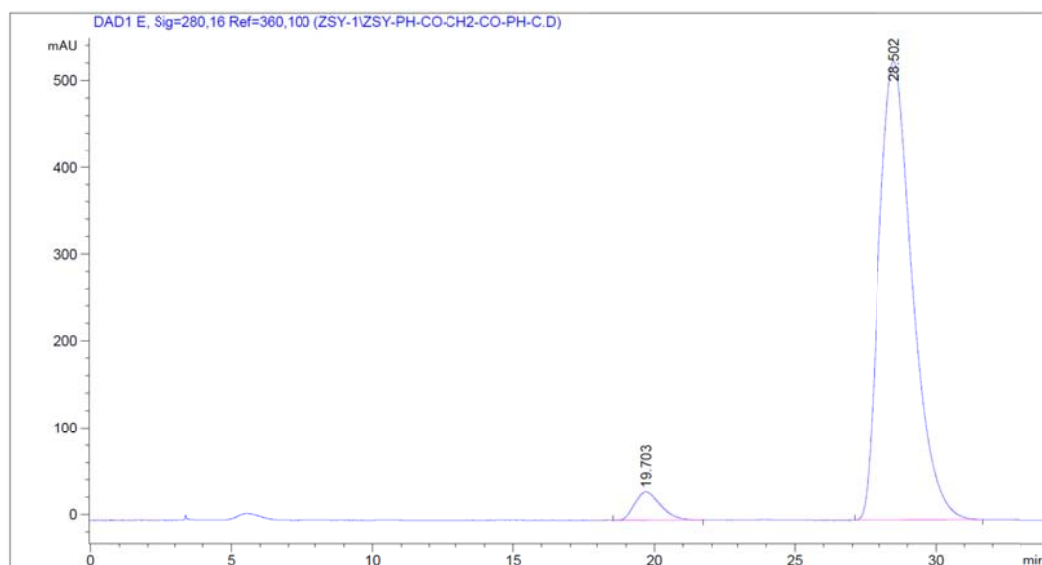

| Peak | Processed channel | Retention time (min) | Peak area (mAU*s) | Peak height (mAU) | Peak area (%) |
|------|-------------------|----------------------|-------------------|-------------------|---------------|
| 1    | PDA 254 nm        | 19.703               | 2042.74182        | 32.60457          | 4.57          |
| 2    | PDA 254 nm        | 28.502               | 4.36587e4         | 528.56146         | 95.43         |

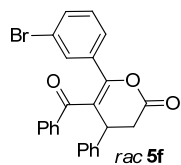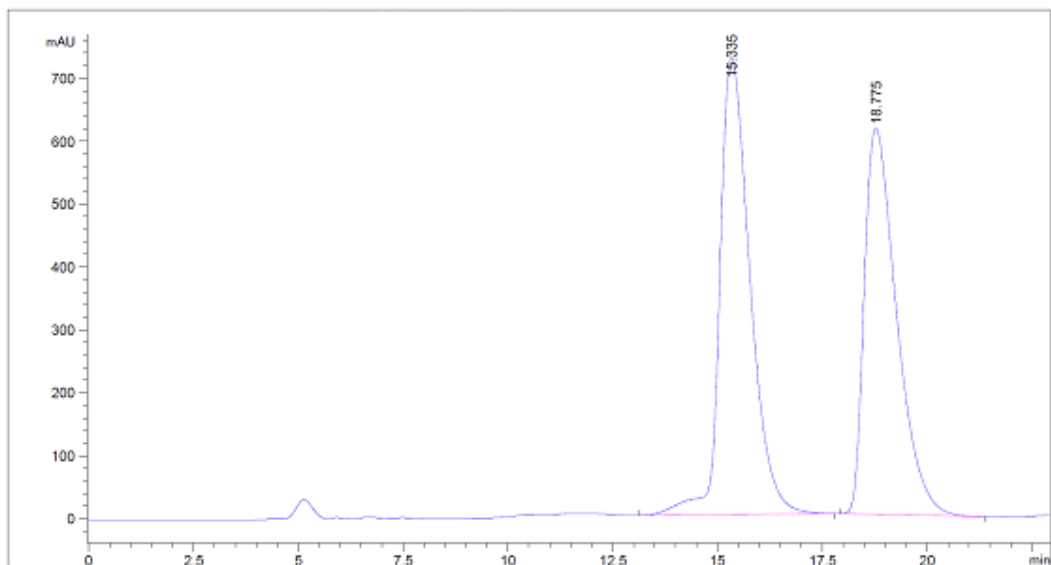

| Peak | Processed channel | Retention time (min) | Peak area (mAU*s) | Peak height (mAU) | Peak area (%) |
|------|-------------------|----------------------|-------------------|-------------------|---------------|
| 1    | PDA 254 nm        | 15.335               | 3.65230e4         | 726.63184         | 52.6592       |
| 2    | PDA 254 nm        | 18.775               | 3.28342e4         | 614.07043         | 47.3408       |

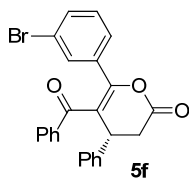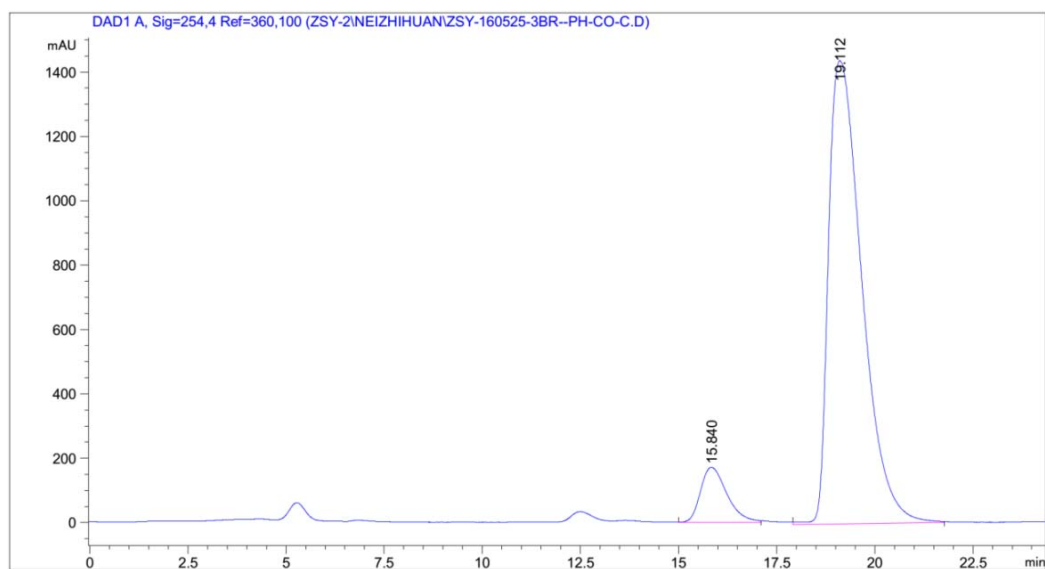

| Peak | Processed channel | Retention time (min) | Peak area (mAU*s) | Peak height (mAU) | Peak area (%) |
|------|-------------------|----------------------|-------------------|-------------------|---------------|
| 1    | PDA 254 nm        | 15.840               | 2850.69312        | 70.71241          | 6.46          |
| 2    | PDA 254 nm        | 19.112               | 4.06294e4         | 742.55450         | 93.54         |

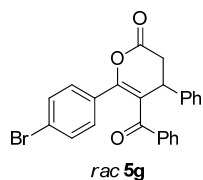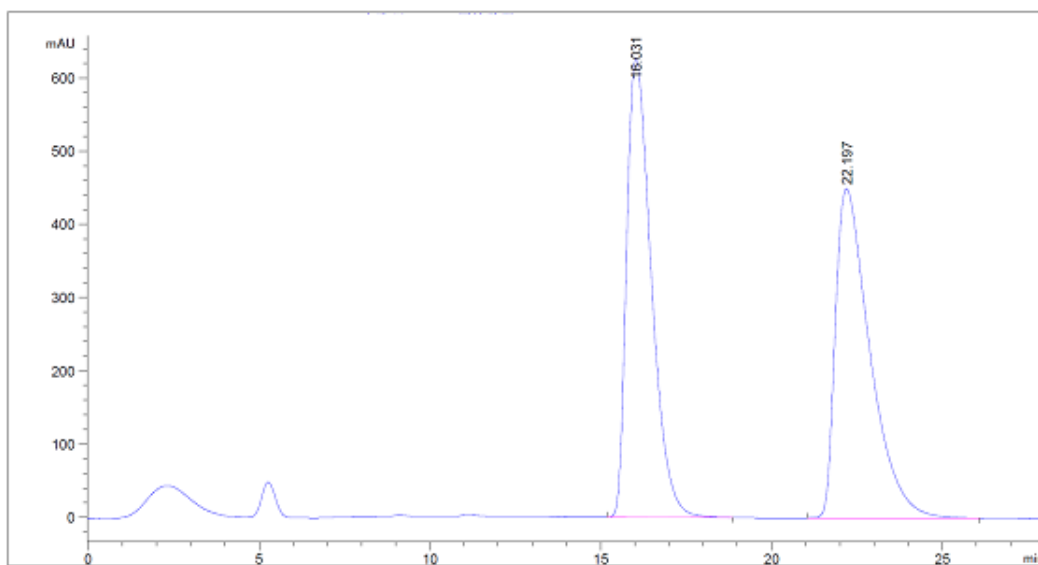

| Peak | Processed channel | Retention time (min) | Peak area (mAU*s) | Peak height (mAU) | Peak area (%) |
|------|-------------------|----------------------|-------------------|-------------------|---------------|
| 1    | PDA 254 nm        | 16.031               | 3.13770e4         | 625.71527         | 49.82         |
| 2    | PDA 254 nm        | 22.197               | 3.16042e4         | 449.75967         | 50.18         |

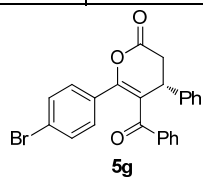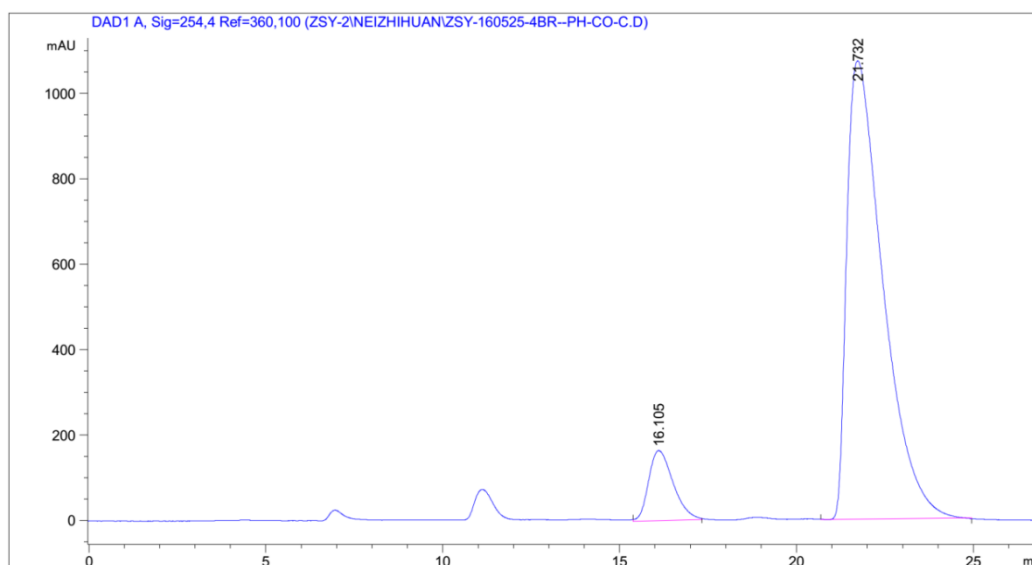

| Peak | Processed channel | Retention time (min) | Peak area (mAU*s) | Peak height (mAU) | Peak area (%) |
|------|-------------------|----------------------|-------------------|-------------------|---------------|
| 1    | PDA 254 nm        | 16.105               | 5375.09473        | 125.85065         | 6.44          |
| 2    | PDA 254 nm        | 21.732               | 6.49187e4         | 920.04065         | 93.56         |

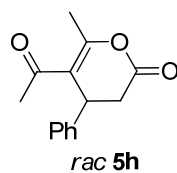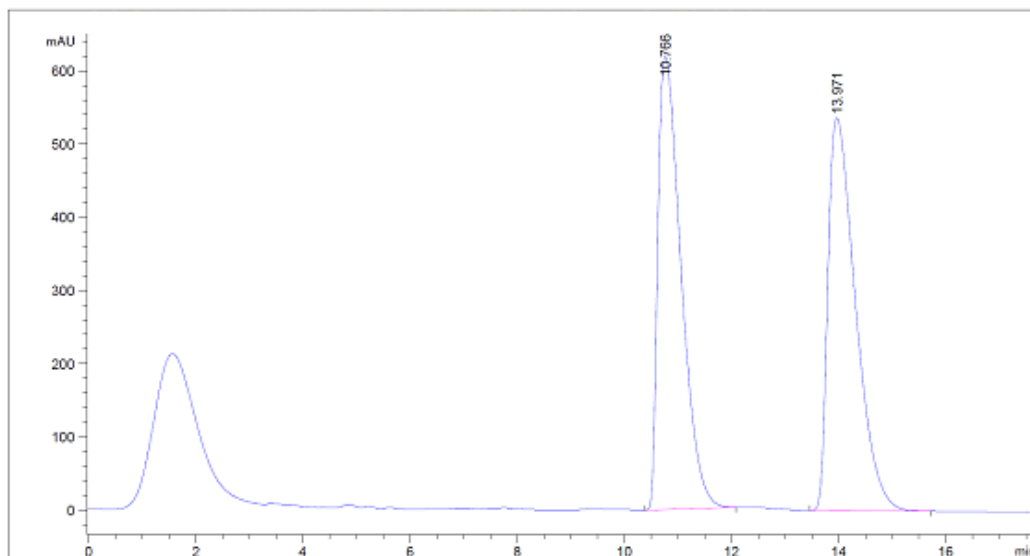

| Peak | Processed channel | Retention time (min) | Peak area (mAU*s) | Peak height (mAU) | Peak area (%) |
|------|-------------------|----------------------|-------------------|-------------------|---------------|
| 1    | PDA 254 nm        | 10.766               | 1.85695e4         | 617.98260         | 49.23         |
| 2    | PDA 254 nm        | 13.971               | 1.91513e4         | 535.67426         | 50.77         |

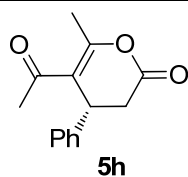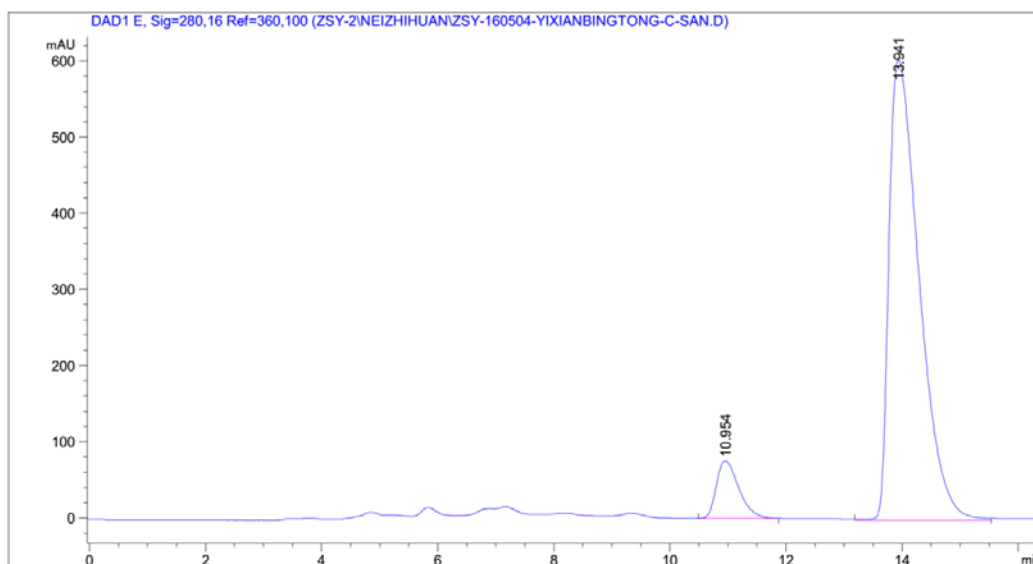

| Peak | Processed channel | Retention time (min) | Peak area (mAU*s) | Peak height (mAU) | Peak area (%) |
|------|-------------------|----------------------|-------------------|-------------------|---------------|
| 1    | PDA 254 nm        | 10.954               | 1669.51978        | 70.43662          | 5.19          |
| 2    | PDA 254 nm        | 13.941               | 2.15267e4         | 602.72693         | 92.81         |

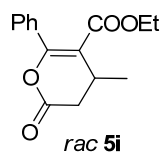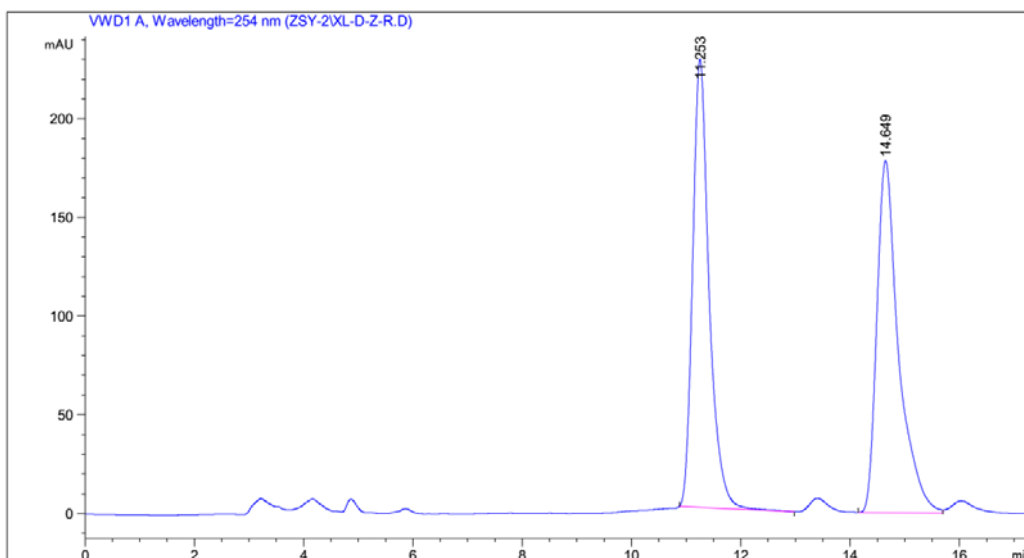

| Peak | Processed channel | Retention time (min) | Peak area (mAU*s) | Peak height (mAU) | Peak area (%) |
|------|-------------------|----------------------|-------------------|-------------------|---------------|
| 1    | PDA 254 nm        | 11.253               | 4749.16016        | 227.04272         | 49.10         |
| 2    | PDA 254 nm        | 14.649               | 4923.09961        | 178.28705         | 50.90         |

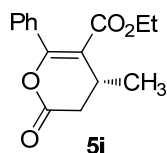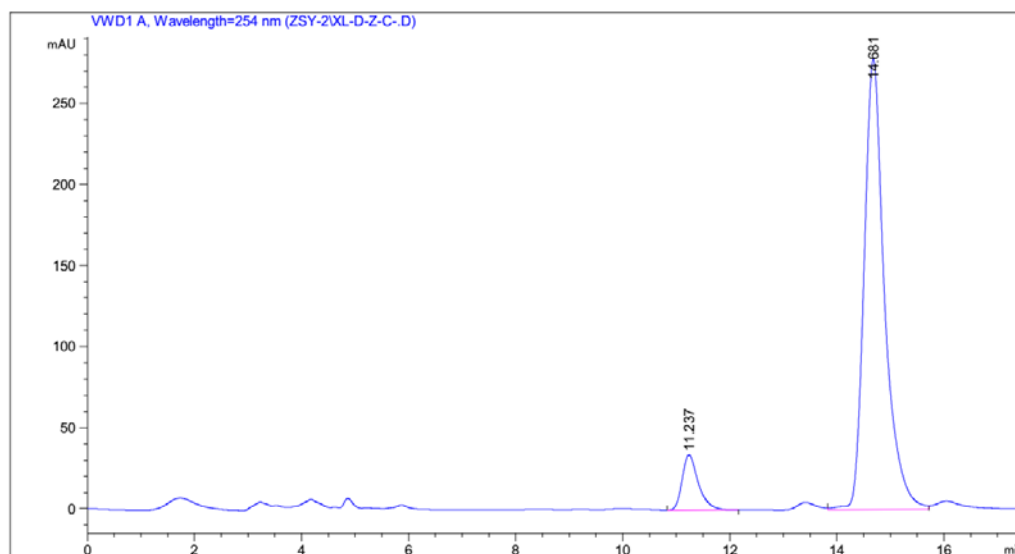

| Peak | Processed channel | Retention time (min) | Peak area (mAU*s) | Peak height (mAU) | Peak area (%) |
|------|-------------------|----------------------|-------------------|-------------------|---------------|
| 1    | PDA 254 nm        | 11.237               | 713.41681         | 34.10785          | 8.41          |
| 2    | PDA 254 nm        | 14.681               | 7382.97266        | 278.02084         | 91.59         |



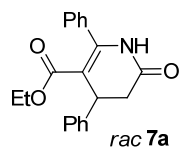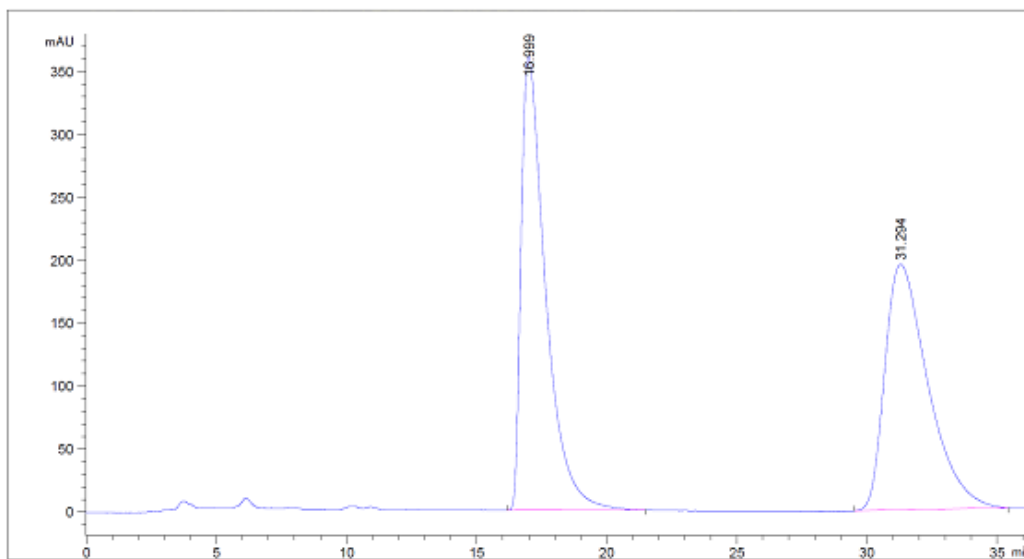

| Peak | Processed channel | Retention time (min) | Peak area (mAU*s) | Peak height (mAU) | Peak area (%) |
|------|-------------------|----------------------|-------------------|-------------------|---------------|
| 1    | PDA 254 nm        | 16.999               | 2.35951e4         | 360.10287         | 51.26         |
| 2    | PDA 254 nm        | 31.294               | 2.24315e4         | 195.12534         | 48.74         |

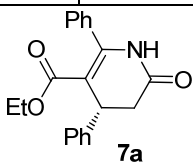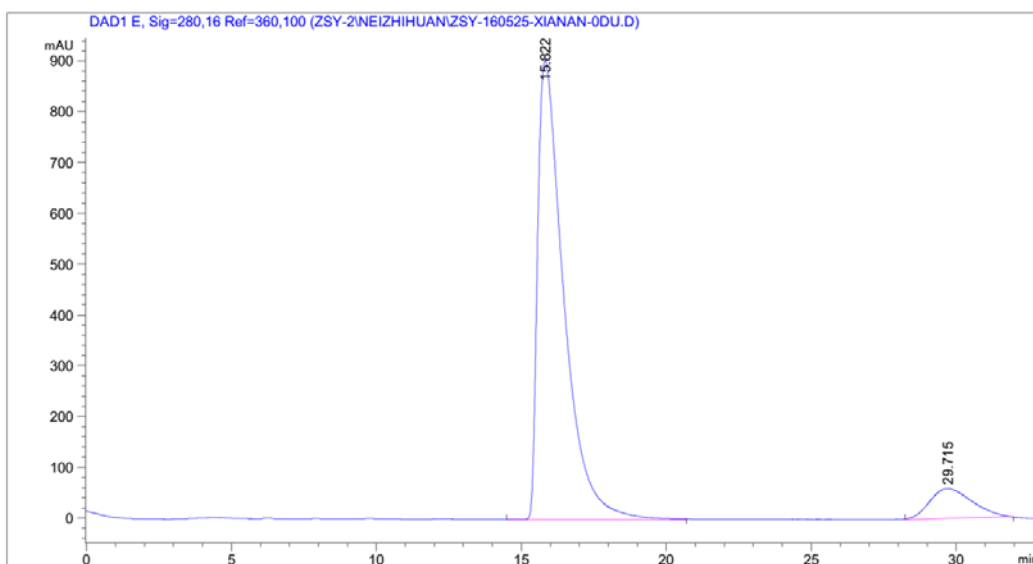

| Peak | Processed channel | Retention time (min) | Peak area (mAU*s) | Peak height (mAU) | Peak area (%) |
|------|-------------------|----------------------|-------------------|-------------------|---------------|
| 1    | PDA 254 nm        | 15.822               | 5.64948e4         | 903.24915         | 92.77         |
| 2    | PDA 254 nm        | 29.715               | 4742.16846        | 53.55134          | 7.23          |

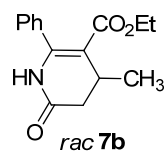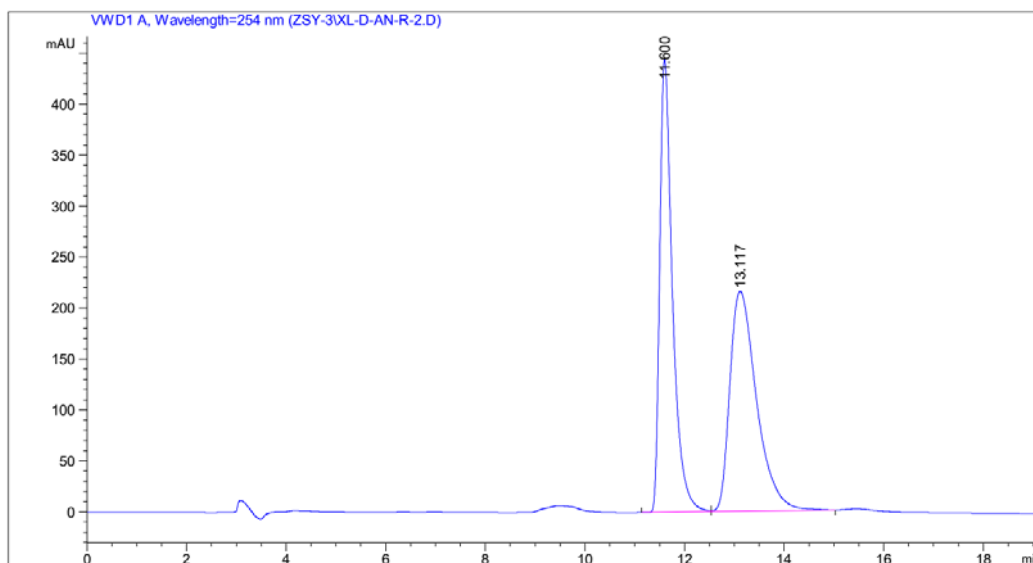

| Peak | Processed channel | Retention time (min) | Peak area (mAU*s) | Peak height (mAU) | Peak area (%) |
|------|-------------------|----------------------|-------------------|-------------------|---------------|
| 1    | PDA 254 nm        | 11.600               | 7892.28906        | 444.20700         | 49.56         |
| 2    | PDA 254 nm        | 13.117               | 8032.83691        | 215.71977         | 50.44         |

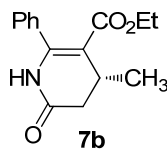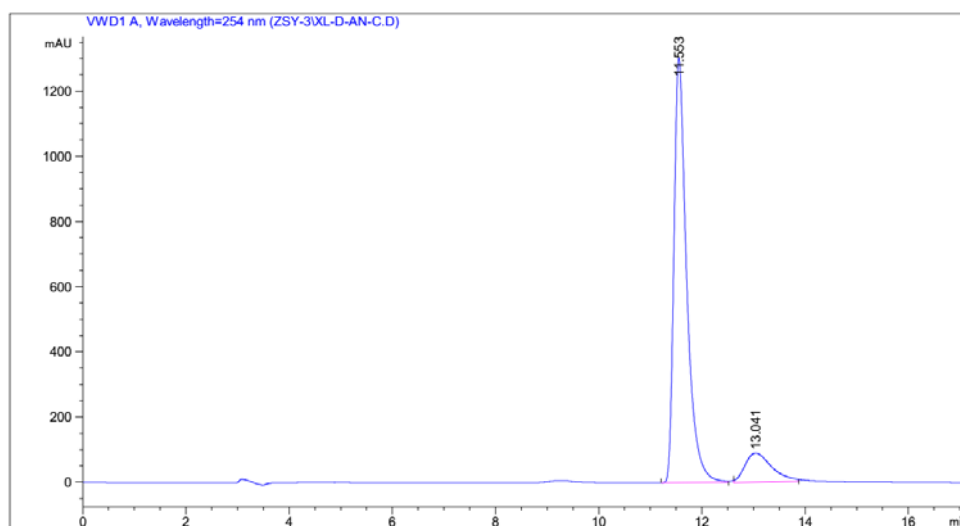

| Peak | Processed channel | Retention time (min) | Peak area (mAU*s) | Peak height (mAU) | Peak area (%) |
|------|-------------------|----------------------|-------------------|-------------------|---------------|
| 1    | PDA 254 nm        | 11.553               | 2.23191e4         | 1303.38452        | 87.67         |
| 2    | PDA 254 nm        | 13.041               | 3240.26709        | 89.55066          | 12.33         |
